# Supplementary material for: Medicinal Plants for Mitigating Pain and Inflammatory-Related Conditions: An Appraisal of Ethnobotanical Uses and Patterns in South Africa
Source: PubMed Central journal article supplement (PMC8569556; doi:10.3389/fphar.2021.758583), 2021-10-22
Supplement: Table1.pdf [file Table1.pdf]

**Supplementary Table S1:** An inventory of 495 plants used for mitigating pain and inflammatory-related conditions in South Africa. Botanical names were verified using PlantZAfrica (pza.sanbi.org), South African National Biodiversity Institute website (<http://newposa.sanbi.org/sanbi/Explore>) as well as the World Flora Online (<http://www.worldfloraonline.org/>). \*Common name: A = Afrikaans; E = English; K= Khoi; KS = Khoisan (Khoe-San), SS = Southern Sotho; SL = Sepulana; SP = Sepedi; NS = Northern Sotho; TW = Twana; X = Xhosa; V= Vhenda; Z = Zulu. #Part used: ns = not specified. Nm =number of mentions/citations

| Botanical name                                                                                                                                                                                             | *Common name                                                            | Family        | Life-form | #Part used  | Application                                                                         | Reference                                  | Nm |
|------------------------------------------------------------------------------------------------------------------------------------------------------------------------------------------------------------|-------------------------------------------------------------------------|---------------|-----------|-------------|-------------------------------------------------------------------------------------|--------------------------------------------|----|
| <i>Abrus precatorius</i> L. Synonyms: <i>Abrus maculatus</i> Noronha, <i>Abrus squamulosus</i> E.Mey.                                                                                                      | Bead vine, coral bead plant, coral bean (E), Umkhokha (Z)               | Fabaceae      | Climber   | ns          | Analgesic (sharp internal body pains)                                               | Mhlongo and Van Wyk (2019)                 | 1  |
| <i>Abutilon fruticosum</i> Guill. & Perr.                                                                                                                                                                  | Shrubby Abutilon (E)                                                    | Malvaceae     | Herb      | Whole plant | Root decoction is used for cramps                                                   | Tshikalange et al. (2016)                  | 1  |
| <i>Acacia dealbata</i> Link. Synonyms: <i>Acacia decurrens</i> var. <i>dealbata</i> (Link) Muller, <i>Racosperma dealbatum</i> (Link) Pedley                                                               | Mimosa, Silver wattle (E), Uwatela (Z)                                  | Fabaceae      | Tree      | ns          | Analgesic (toothache). Used for period pains                                        | Mhlongo and Van Wyk (2019); Mbanjwa (2020) | 2  |
| <i>Acacia mearnsii</i> De Wild. Synonyms: <i>Racosperma mearnsii</i> (De Wild.) Pedley, <i>Acacia decurrens</i> var. <i>mollis</i> Lindl.                                                                  | Black wattle (E), Uwatela (Z)                                           | Fabaceae      | Tree      | Bark, ns    | Analgesic (toothache). Ground bark is given with water thrice daily for stomachache | Mhlongo and Van Wyk (2019); Bhat (2014)    | 2  |
| <i>Acalypha glabrata</i> Thunb. var. <i>glabrata</i> Synonyms: <i>Acalypha betulina</i> E.Mey., <i>Ricinocarpus glabratus</i> (Thunb.) Kuntze                                                              | Forest False Nettle, Forest Mock Nettle (E), Isithobothi, Uthobothi (Z) | Euphorbiaceae | Shrub     | ns          | Analgesic (general body pains)                                                      | Mhlongo and Van Wyk (2019)                 | 1  |
| <i>Acalypha glandulifolia</i> Buchinger & Meisn. ex C.Krauss Synonyms: <i>Acalypha entumenica</i> Prain, <i>Acalypha peduncularis</i> var. <i>glandulifolia</i> (Buchinger & Meisn. ex C.Krauss) Müll.Arg. | Umsununundu (Z)                                                         | Euphorbiaceae | Herb      | ns          | Musculo-skeletal (inflammation)                                                     | Mhlongo and Van Wyk (2019)                 | 1  |

| <b>Botanical name</b>                                                                                                                           | <b>*Common name</b>                                                                                                                                       | <b>Family</b> | <b>Life-form</b> | <b>#Part used</b> | <b>Application</b>                                                                                                                                                                                            | <b>Reference</b>                                                                                              | <b>Nm</b> |
|-------------------------------------------------------------------------------------------------------------------------------------------------|-----------------------------------------------------------------------------------------------------------------------------------------------------------|---------------|------------------|-------------------|---------------------------------------------------------------------------------------------------------------------------------------------------------------------------------------------------------------|---------------------------------------------------------------------------------------------------------------|-----------|
| <i>Acanthospermum hispidum</i> DC.<br>Synonyms <i>Acanthospermum humile</i> var. <i>hispidum</i> (DC.)<br>Kuntze                                | Upright starbur, goat's head (E), inkunaana (X)                                                                                                           | Asteraceae    | Herb             | Whole plant       | Whole plant decoction is used to treat stomachache in children                                                                                                                                                | Bhat (2013)                                                                                                   | 1         |
| <i>Acokanthera oblongifolia</i> (Hochst.) Codd<br>Synonyms: <i>Acokanthera spectabilis</i> (Sond.) Hook.f., <i>Carissa oblongifolia</i> Hochst. | Dune poison-bush (E), Inxinebe (X), Inhlungunyemba, Inhlungunyembe (Z)                                                                                    | Apocynaceae   | Shrub            | Leaves, ns        | Headache, analgesic (headache, general pains, toothache), musculo-skeletal inflammation                                                                                                                       | Maroyi (2017); Mhlongo and Van Wyk (2019)                                                                     | 2         |
| <i>Acokanthera oppositifolia</i> (Lam.) Codd.<br>Synonyms: <i>Acokanthera venenata</i> , <i>Carissa acokanthera</i>                             | Bushman's arrow poison, Hottentot's poison bush, kaffir poison bush, poison bush/tree (E), iNxinene (X), ubuhlungu-benyoka, umkhwangu, Inhlungunyembe (Z) | Apocynaceae   | Shrub            | Leaves, roots     | For painful feet, rheumatism, toothache, abnormal menstrual period and swellings. Analgesic (headache, general pain, sharp internal body pains). Powder made from the dry roots is used as stuff for headache | Hutchings et al. (1996); Watt and Breyer-Brandwijk (1962); Mhlongo and Van Wyk (2019); Bhat and Jacobs (1995) | 4         |
| <i>Acorus calamus</i> L.<br>Synonyms: <i>Acorus angustifolius</i> Schott, <i>Acorus verus</i> (L.) Raf.                                         | Sweet-flag (E), makkalmoes (A), Indawolucwatho, ikalamuzi (Z)                                                                                             | Acoraceae     | Herb             | ns                | Used for period pains                                                                                                                                                                                         | Mbanjwa (2020)                                                                                                | 1         |
| <i>Adansonia digitata</i> L.<br>Synonyms: <i>Adansonia bahobab</i> L., <i>Baobabus digitata</i> (L.) Kuntze                                     | Baobab, Cream of Tartar tree, monkey-bread tree, lemonade tree (E), kremetartboom(A), mowana (TW), muvhuyu (V), isimuku, umShimulu, isiMuhu (Z)           | Malvaceae     | Tree             | Leaves            | Cooked leaves are eaten by women as potherb at the same time acting as the period pains reliever                                                                                                              | Mokganya and Tshisikhawe (2019)                                                                               | 1         |
| <i>Adenandra uniflora</i> (L.) Willd.<br>Synonyms: <i>Adenandra pottsii</i> Dummer, <i>Glandulifolia uniflora</i> (L.) J.C. Wendl.              | China flower, shepherd's delight (E), Kommetjie teewater, bergskaapboegoe (A)                                                                             | Rutaceae      | Shrub            | Leaves            | Remedy for pains                                                                                                                                                                                              | Mintsa Mi Nzue (2009)                                                                                         | 1         |

| <b>Botanical name</b>                                                                                                                                                                   | <b>*Common name</b>                                                                                                       | <b>Family</b>  | <b>Life-form</b> | <b>#Part used</b> | <b>Application</b>                                                                                                                                                                                                                            | <b>Reference</b>                                                                                                                        | <b>Nm</b> |
|-----------------------------------------------------------------------------------------------------------------------------------------------------------------------------------------|---------------------------------------------------------------------------------------------------------------------------|----------------|------------------|-------------------|-----------------------------------------------------------------------------------------------------------------------------------------------------------------------------------------------------------------------------------------------|-----------------------------------------------------------------------------------------------------------------------------------------|-----------|
| <i>Adenia digitata</i> (Harv.) Engl.<br>Synonyms: <i>Adenia angustisecta</i><br>Burt Davy, <i>Modecca digitata</i><br>Harv.                                                             | Wild granadilla (E), dundu<br>(V)                                                                                         | Passifloraceae | Climber          | Roots             | Root decoction is drunk and<br>applied external to swollen<br>legs                                                                                                                                                                            | Arnold and<br>Gulumian (1984)                                                                                                           | 1         |
| <i>Adenia gummifera</i> (Harv.)<br>Harms. Synonyms: <i>Adenia</i><br><i>rhodesica</i> Suess., <i>Modecca</i><br><i>gummifera</i> Harv.                                                  | Wild Grenadilla, Snake-<br>climber, Monkey Rope (E),<br>Slangklimop (A), Impinda,<br>Umphindamshaya,<br>Impindamshaye (Z) | Passifloraceae | Climber          | Vine, bark        | For treating body pains and<br>headache. Used to cure pain<br>in shoulders and between<br>shoulder blades ( <i>isibhobo</i> ).<br>Bark is used for period pains                                                                               | Philander (2011);<br>Mbanjwa (2020)                                                                                                     | 2         |
| <i>Adromischus triflorus</i> (L.f.)<br>A.Berger. Synonyms:<br><i>Adromischus procurvus</i><br>(N.E.Br.) C.A.Sm., <i>Cotyledon</i><br><i>triflora</i> L.f.                               | duck's foot, calico heart<br>(E), bontplakkie, eendevoet<br>(A)                                                           | Crassulaceae   | Herb             | Leaves            | Leaf juice is used for ear-<br>ache (otitis) and toothache                                                                                                                                                                                    | Hulley and Van<br>Wyk (2019)                                                                                                            | 1         |
| <i>Afroaster hispida</i> (Thunb.) J.C.<br>Manning & Goldblatt.<br>Synonyms: <i>Aster asper</i><br>J.M.Wood & M.S.Evans, <i>Aster</i><br><i>bakerianus</i> Burt Davy ex<br>C.A.Sm.       | Udlutshana, Udlutshani (Z)                                                                                                | Asteraceae     | Shrub            | ns                | Musculo-skeletal (back<br>problem)                                                                                                                                                                                                            | Mhlongo and Van<br>Wyk (2019)                                                                                                           | 1         |
| <i>Afrocanthium mundianum</i><br>(Cham. & Schltdl.) Lantz.<br>Synonyms: <i>Canthium</i><br><i>mundianum</i> Cham. & Schltdl.,<br><i>Plectronia mundiana</i> (Cham. &<br>Schltdl.) Pappe | Rock-alder (E), Klipels (A),<br>mutomboti (V)                                                                             | Rubiaceae      | Tree             | Roots             | Root maceration is drunk for<br>abdominal pains                                                                                                                                                                                               | Arnold and<br>Gulumian (1984)                                                                                                           | 1         |
| <i>Agathosma betulina</i> (Berg.)<br>Pillans. Synonyms: <i>Diosma</i><br><i>betulina</i> Thunb., <i>Bucco betulina</i><br>Schult.                                                       | Long-leaf buchu (E),<br>langblaar boegoe (A),<br>buchu (K), ibuchu (X)                                                    | Rutaceae       | Shrub            | Leaves            | For relieving the symptoms<br>of rheumatism and easing<br>backache. Dried leaves are<br>used to treat stomachache.<br>Infusions used for arthritis,<br>inflammation and backache.<br>Applied externally for<br>sprains. For sprains and pains | Watt and Breyer-<br>Brandwijk<br>(1962); De Beer<br>and Van Wyk<br>(2011); Hulley<br>and Van Wyk<br>(2019); Philander<br>(2011); Thring | 6         |

| Botanical name                                                                                                                                          | *Common name                                                                                                                                    | Family       | Life-form | #Part used      | Application                                                                                                                                                    | Reference                                              | Nm |
|---------------------------------------------------------------------------------------------------------------------------------------------------------|-------------------------------------------------------------------------------------------------------------------------------------------------|--------------|-----------|-----------------|----------------------------------------------------------------------------------------------------------------------------------------------------------------|--------------------------------------------------------|----|
|                                                                                                                                                         |                                                                                                                                                 |              |           |                 | (including arthritic pain), the dried leaves are placed on a cloth and sprinkle with brandy or vinegar and wrap cloth around affected area to relieve the pain | and Weitz (2006); Mintsu Mi Nzue (2009)                |    |
| <i>Agathosma imbricata</i> (L.) Willd.<br>Synonyms: <i>Agathosma lambii</i> Dummer, <i>Hartogia ciliata</i> P.J.Bergius                                 | Sand buchu (E), sandboegoe (A)                                                                                                                  | Rutaceae     | Shrub     | Leaves          | Applied externally for sprains                                                                                                                                 | Philander (2011)                                       | 1  |
| <i>Agathosma odoratissima</i> (Montin) Pillans. Synonyms: <i>Barosma alpina</i> Eckl. & Zeyh., <i>Diosma odoratissima</i> Montin                        | Breëblaarboegoe (A)                                                                                                                             | Rutaceae     | Shrub     | Leaves          | Applied externally for sprains                                                                                                                                 | Philander (2011)                                       | 1  |
| <i>Agathosma ovata</i> (Thunb.) Pillans. Synonyms: <i>Agathosma acuminata</i> Drège ex Walp., <i>Barosma lanceolata</i> Sond.                           | Kluitjieskraal false buchu (E), Kluitjieskraalbasterboegoe (A)                                                                                  | Rutaceae     | Shrub     | ns              | Treatment of back pain                                                                                                                                         | Van Wyk et al. (2008)                                  | 1  |
| <i>Agave americana</i> L. Synonyms: <i>Agave americana</i> var. <i>marginata</i> Trel., <i>Aloe americana</i> (L.) Crantz                               | American agave, American aloe, century plant (E), Amerikaanse aalwee, Amerikaanse aalwyn, blou-aalwee, blougaringboom, gareboom, makaalwyn (A), | Asparagaceae | Herb      | Leaves          | Leaves used as a poultice for pain and inflammation, sprained ankle and rheumatism                                                                             | Hulley and Van Wyk (2019)                              | 1  |
| <i>Albizia adianthifolia</i> (Schumach.) W.Wight. Synonyms: <i>Albizia adianthifolia</i> var. <i>adianthifolia</i> , <i>Mimosa adianthifolia</i> Schum. | Flat-crown albizia, rough-bark flat-crown (E), platkroon (A), iGowane, Usolo, umNebelele (Z), umHlandlothi (X)                                  | Fabaceae     | Tree      | Bark            | Infusions of the bark are taken orally to treat arthritis. Analgesic (backache, headache)                                                                      | Van Wyk and Gericke (2000); Mhlongo and Van Wyk (2019) | 2  |
| <i>Alepidea amatymbica</i> Eckl. & Zeyh.                                                                                                                | larger tinsel flower (E), kalmoes (A), Iqwili (X), ikhathazo (Z)                                                                                | Apiaceae     | Herb      | Rhizomes, roots | Rhizomes are used for rheumatism. Rootstock is used for abdominal pain and headache                                                                            | Hutchings et al. (1996); Maroyi (2017)                 | 2  |

| <b>Botanical name</b>                                                                                                                         | <b>*Common name</b>                                                                                                | <b>Family</b>    | <b>Life-form</b> | <b>#Part used</b> | <b>Application</b>                                                                                                                                                                                                                        | <b>Reference</b>                                                                   | <b>Nm</b> |
|-----------------------------------------------------------------------------------------------------------------------------------------------|--------------------------------------------------------------------------------------------------------------------|------------------|------------------|-------------------|-------------------------------------------------------------------------------------------------------------------------------------------------------------------------------------------------------------------------------------------|------------------------------------------------------------------------------------|-----------|
| <i>Alepidea setifera</i> N.E.Br.                                                                                                              | Lesokwana (SS)                                                                                                     | Apiaceae         | Herb             | ns                | Used to treat toothache                                                                                                                                                                                                                   | Mogale et al. (2019)                                                               | 1         |
| <i>Allium sativum</i> L. Synonyms: <i>Allium longicuspis</i> Regel, <i>Porrum ophioscorodon</i> (Link) Rchb.                                  | Garlic (E), knoffel (A)                                                                                            | Amaryllidaceae   | Herb             | Bulbs             | Cloves are eaten raw. Taken on a daily basis for arthritis and pains, backache and rheumatism                                                                                                                                             | Thring and Weitz (2006)                                                            | 1         |
| <i>Aloe arborescens</i> Mill. Synonyms: <i>Aloe arborea</i> Medik., <i>Catevala arborescens</i> (Mill.) Medik.                                | Krantz aloe (E), kransaalwyn (A), ikalene (X), Inhlabane, Inkalane (Z)                                             | Xanthorrhoeaceae | Shrub            | Leaves, ns        | Musculo-skeletal inflammation. Small piece of leaves are mixed with chicken feed as anti-inflammatory herb. Two-three spoon of leaf gel is taken orally to treat stomachache. For relieving menstrual pains and poultice for painful feet | Mhlongo and Van Wyk (2019); Bhat (2014); Mbanjwa (2020)                            | 3         |
| <i>Aloe aristata</i> Haw. Synonyms: <i>Aloe aristata</i> var. <i>leiophylla</i> Baker, <i>Aloe longiaristata</i> Schult. & Schult.f.          | Lace aloe (E), uMathithibala (Z)                                                                                   | Xanthorrhoeaceae | Herb             | Roots             | For relieving headache                                                                                                                                                                                                                    | Mintsa Mi Nzue (2009)                                                              | 1         |
| <i>Aloe chabaudii</i> Schönland. Synonyms: <i>Aloe chabaudii</i> var. <i>chabaudii</i> , <i>Aloe chabaudii</i> var. <i>verekeri</i> Christian | Tshikhopha (V)                                                                                                     | Xanthorrhoeaceae | Herb             | Leaves            | Leaves are cut with razor, warmed on fire and pressed on swollen ankles                                                                                                                                                                   | Arnold and Gulumian (1984)                                                         | 1         |
| <i>Aloe dichotoma</i> Masson = <i>Aloidendron dichotomum</i> (Masson) Klopper & Gideon F.Sm.                                                  | Quiver tree (E); kokerboom (A), Kokerboom (KS)                                                                     | Xanthorrhoeaceae | Tree             | Roots             | Root decoction used for treatment of pain. An infusion is used for backache                                                                                                                                                               | Nortje and van Wyk (2015); De Beer and Van Wyk (2011)                              | 2         |
| <i>Aloe ferox</i> Mill. Synonyms: <i>Aloe galpinii</i> Baker, <i>Aloe muricata</i> Haw.                                                       | Bitter aloe, red aloe, century tree (E), bitteraalwyn, bergaalwyn (A), iKhala, umHlaba, uNomaweni (X), iNhlaba (Z) | Xanthorrhoeaceae | Shrub            | Leaves            | Leaves are boiled in water and taken orally for arthritis. Leaf gel is used for stomachache. Leaf infusion is used for back pain. Leaf decoctions (half a cup) is                                                                         | Watt and Breyer-Brandwijk (1962); Bruce (1975); Maroyi (2017); De Beer and Van Wyk | 8         |

| Botanical name                                                                                                                                                             | *Common name                                                                                                          | Family           | Life-form | #Part used | Application                                                                                                   | Reference                                                                              | Nm |
|----------------------------------------------------------------------------------------------------------------------------------------------------------------------------|-----------------------------------------------------------------------------------------------------------------------|------------------|-----------|------------|---------------------------------------------------------------------------------------------------------------|----------------------------------------------------------------------------------------|----|
|                                                                                                                                                                            |                                                                                                                       |                  |           |            | taken orally for stomachache. Leaf infusion is taken orally as a gargle for toothache. For relieving headache | (2011); Bhat and Jacobs (1995); Bhat (2014); Hulley and Van Wyk (2019); Mbanjwa (2020) |    |
| <i>Aloe greatheadii</i> var. <i>davyana</i> (Schönland) Glen & D.S.Hardy. Synonyms: <i>Aloe davyana</i> Schönland, <i>Aloe mutans</i> Reynolds                             | Spotted aloe (E), Transvaalaalwyn, grasaalwyn (A), kgopane (TW), lekgala, lekgala la Lesotho, lekgala la quthing (SS) | Xanthorrhoeaceae | Shrub     | Leaves     | Leaf is placed in hot water and used to rub over a sprained ankle/joint                                       | Mogale et al. (2019)                                                                   | 1  |
| <i>Aloe maculata</i> All. Synonyms: <i>Aloe commutata</i> var. <i>bicolor</i> A.Berger, <i>Aloe umbellata</i> DC.                                                          | Soap aloe (E), bontaalwyn (A), Ikena, Ichenyane, Inhlaba (Z)                                                          | Xanthorrhoeaceae | Herb      | ns         | Musculo-skeletal inflammation. Used as poultice for painful feet                                              | Mhlongo and Van Wyk (2019); Mbanjwa (2020)                                             | 2  |
| <i>Aloe microstigma</i> Salm-Dyck. Synonyms: <i>Aloe brunthaleri</i> A.Berger ex Camm., <i>Aloe juttae</i> Dinter                                                          | Karoo aloe, small-spotted aloe (E), karoo-aalwyn (A)                                                                  | Xanthorrhoeaceae | Herb      | Leaves     | Leaves are used to treat back pain                                                                            | De Beer and Van Wyk (2011); Hulley and Van Wyk (2019)                                  | 2  |
| <i>Aloe striata</i> Haw. Synonyms: <i>Aloe albocincta</i> Haw., <i>Aloe rhodocincta</i> Baker                                                                              | Coral aloe (E), Blouaalwyn (A)                                                                                        | Xanthorrhoeaceae | Herb      | Leaves     | Leaves are heated in the fire or in warm ash and apply for leg pain and rheumatism                            | Van Wyk et al. (2008)                                                                  | 1  |
| <i>Aloe thraskii</i> Baker                                                                                                                                                 | Dune aloe (E), Inhlaba yasolwandle, Isigoba (Z)                                                                       | Xanthorrhoeaceae | Tree      | ns         | Analgesic (sharp internal pains)                                                                              | Mhlongo and Van Wyk (2019)                                                             | 1  |
| <i>Aloe variegata</i> L. = <i>Gonialoe variegata</i> (L.) Boatwr. & J.C.Manning. Synonyms: <i>Aloe ausana</i> Dinter, <i>Aloe variegata</i> var. <i>haworthii</i> A.Berger | Partridge breast aloe (E), kanniedood, bontalwyn (A)                                                                  | Xanthorrhoeaceae | Herb      | Leaves     | Leaf pulp is used to treat pain. Leaves used as poultice for inflammation, boils and whitlow fingers          | De Beer and Van Wyk (2011); Hulley and Van Wyk (2019)                                  | 2  |
| <i>Aloidendron barberae</i> (Dyer) Klopper & Gideon F.Sm. = <i>Aloe bainesii</i> T.-Dyer. Synonyms <i>Aloe barberae</i> Dyer                                               | Tree aloe (E), sigoba, Inhlabende, Inhlaba yesilungu (Z)                                                              | Xanthorrhoeaceae | Tree      | ns         | Analgesic (sharp internal body pains). Used for toothache                                                     | Mhlongo and Van Wyk (2019); Mbanjwa (2020)                                             | 2  |

| <b>Botanical name</b>                                                                                                                                                                                   | <b>*Common name</b>                                                                                                                                       | <b>Family</b>  | <b>Life-form</b> | <b>#Part used</b> | <b>Application</b>                                                                       | <b>Reference</b>                                                              | <b>Nm</b> |
|---------------------------------------------------------------------------------------------------------------------------------------------------------------------------------------------------------|-----------------------------------------------------------------------------------------------------------------------------------------------------------|----------------|------------------|-------------------|------------------------------------------------------------------------------------------|-------------------------------------------------------------------------------|-----------|
| <i>Alsophila dregei</i> (Kunze)<br>R.M.Tryon. Synonym: <i>Cyathea dregei</i>                                                                                                                            | Grassland tree fern,<br>common tree fern (E),<br>Inkomankoma,<br>Inkombandlela (Z)                                                                        | Cyatheaceae    | Shrub            | ns                | Analgesic (sharp internal<br>body pains)                                                 | Mhlongo and Van<br>Wyk (2019)                                                 | 1         |
| <i>Amaranthus spinosus</i> L.<br>Synonyms: <i>Amaranthus spinosus</i> var. <i>basicissus</i> Thell.,<br><i>Galliardia spitosa</i> (L.) Nieuwl.                                                          | Spiny amaranth, spiny<br>pigweed, prickly amaranth<br>(E), Isinyembane (Z)                                                                                | Amaranthaceae  | Herb             | ns                | Analgesic (sharp internal<br>body pains- <i>izibhobo</i> )                               | Mhlongo and Van<br>Wyk (2019)                                                 | 1         |
| <i>Ammocharis coranica</i> (Ker<br>Gawl.) Herb. Synonyms:<br><i>Amaryllis coranica</i> Ker Gawl.,<br><i>Brunsvigia coranica</i> (Ker<br>Gawl.) Ker Gawl., <i>Crinum<br/>tavelianum</i> (Schinz) Fritsch | karoo lily, koranna lily,<br>sore eye flower, bible<br>flower, ground lily (E),<br>berglelie, gifbol,<br>seeroogblom (A) isidiya,<br>icukudo, incotho (Z) | Amaryllidaceae | Herb             | Bulbs             | Bulb is used in the treatment<br>of footache                                             | Mongalo and<br>Makhafola (2018)                                               | 1         |
| <i>Aneilema aequinoctiale</i><br>(P.Beauv.) Loudon. Synonyms:<br><i>Aneilema adhaerens</i> Kunth                                                                                                        | Clinging aneilema (E),<br>Idangabane (Z)                                                                                                                  | Commelinaceae  | Shrub            | ns                | Musculo-skeletal<br>(inflammation)                                                       | Mhlongo and Van<br>Wyk (2019)                                                 | 1         |
| <i>Anemone tenuifolia</i> (L.f.) DC.<br>Synonyms: <i>Anemone capensis</i><br>Lam., <i>Clematis capensis</i> Poir.                                                                                       | Cape Anemone, Syblom,<br>Wildanemone, Windflower,<br>black widow (E),<br>Anemoon, Syblom,<br>katiedreiblaar,<br>Veldanemoon (A)                           | Ranunculaceae  | Herb             | Leaves            | Leaves used for treating<br>toothache and headache                                       | Philander (2011)                                                              | 1         |
| <i>Anemone vesicatoria</i> (L.f.)<br>Prantl. Synonyms: <i>Knowltonia<br/>vesicatoria</i> (L.f.) Sims,<br><i>Christophoriana vesicatoria</i><br>(L.f.) Kuntze                                            | Blisterleaf (E), brandblaar,<br>katjiedrieblaar,<br>tandpynblaar (A)                                                                                      | Ranunculaceae  | Herb             | Leaves            | Fresh leaf infusions are used<br>for rheumatism. Used to treat<br>toothache and headache | Forbes (1986);<br>Hutchings et al.<br>(1996); Hulley<br>and Van Wyk<br>(2019) | 3         |
| <i>Anginon difforme</i> (L.) B.L.Burtt.<br>Synonyms: <i>Bupleurum difforme</i><br>L., <i>Rhyticarpus difformis</i> (L.)<br>Briq.                                                                        | Common needle-leaf (E),<br>Pennebos (KS)                                                                                                                  | Apiaceae       | Shrub            | Leaves            | Leaf decoction is used for<br>backache                                                   | Nortje and van<br>Wyk (2015)                                                  | 1         |
| <i>Anisodonteia triloba</i> (Thunb.)<br>D.M.Bates. Synonyms: <i>Malva</i>                                                                                                                               | Wildestokroos (A)                                                                                                                                         | Malvaceae      | Herb             | Leaves            | Leaf infusion is used for<br>headache                                                    | De Beer and Van<br>Wyk (2011)                                                 | 1         |

| Botanical name                                                                                                             | *Common name                                                                                                                                                                                | Family           | Life-form | #Part used      | Application                                                                                                                                                                                                                                                            | Reference                                             | Nm |
|----------------------------------------------------------------------------------------------------------------------------|---------------------------------------------------------------------------------------------------------------------------------------------------------------------------------------------|------------------|-----------|-----------------|------------------------------------------------------------------------------------------------------------------------------------------------------------------------------------------------------------------------------------------------------------------------|-------------------------------------------------------|----|
| <i>triloba</i> Thunb., <i>Malvastrum grossulariifolium</i> var. <i>parvifolium</i> Harv. p.p.                              |                                                                                                                                                                                             |                  |           |                 |                                                                                                                                                                                                                                                                        |                                                       |    |
| <i>Annona senegalensis</i> Pers.<br>Synonyms: <i>Annona arenaria</i> Thonn. ex Schumach., <i>Annona chrysophylla</i> Bojer | African custard-apple, wild custard apple (E), Muembe (V)                                                                                                                                   | Annonaceae       | Shrub     | Roots, branches | Roots are boiled and the mixture drunk for pains during pregnancy. Root maceration is taken for stomachache. Root decoction is used to prepare soft porridge twice daily to relieve headache due to indigestion. Branches are tied around the head to relieve headache | Mahwasane et al. (2013); Arnold and Gulumian (1984)   | 2  |
| <i>Ansellia africana</i> Lindl.                                                                                            | Leopard orchid (E), Imfe yenkawu, Iphakama (Z)                                                                                                                                              | Orchidaceae      | Herb      | ns              | Analgesic (sharp internal body pains)                                                                                                                                                                                                                                  | Mhlongo and Van Wyk (2019)                            | 1  |
| <i>Antidesma venosum</i> E.Mey. ex Tul. Synonyms: <i>Antidesma fuscocinereum</i> Beille, <i>Minutalia tomentosa</i> Fenzl  | Tasselberry (E), Voëlsitboom, Tosselbessie (A), modulane (NS), Kgôbê-tsabadisana, Moingwe, Segagama (TW), Mufhala-khwali (V), Umtiyongi (X), Isiqutwane, Umhlabahlungulu, Umhlalanyoni (Z), | Phyllanthaceae   | Tree      | ns              | For treating headache                                                                                                                                                                                                                                                  | Mintsa Mi Nzue (2009)                                 | 1  |
| <i>Antizoma miersiana</i> Harv.<br>Synonym: <i>Cissampelos angustifolia</i>                                                | Bloubos (KS)                                                                                                                                                                                | Menispermaceae   | Shrub     | Leaves, twigs   | Leaf and twig decoction used for pains, such as backache and knee pain                                                                                                                                                                                                 | Nortje and van Wyk (2015)                             | 1  |
| <i>Aptosimum indivisum</i> Burch. ex Benth. Synonym: <i>Aptosimum nanum</i> Engl.                                          | Veld Violet, Wild Violet, Karoo Violet (E), Karoovioltjie (A)                                                                                                                               | Scrophulariaceae | Herb      | Whole plant     | Infusion of whole plant is used to treat stomachache, toothache and headache. Used for ear-ache. Leaf infusion is drunk for pain and inflammation                                                                                                                      | De Beer and Van Wyk (2011); Hulley and Van Wyk (2019) | 2  |



| <b>Botanical name</b>                                                                                                                            | <b>*Common name</b>                                               | <b>Family</b>    | <b>Life-form</b> | <b>#Part used</b> | <b>Application</b>                                                                                                                                                                                                                                                                                                                                       | <b>Reference</b>                                                                                                                                              | <b>Nm</b> |
|--------------------------------------------------------------------------------------------------------------------------------------------------|-------------------------------------------------------------------|------------------|------------------|-------------------|----------------------------------------------------------------------------------------------------------------------------------------------------------------------------------------------------------------------------------------------------------------------------------------------------------------------------------------------------------|---------------------------------------------------------------------------------------------------------------------------------------------------------------|-----------|
| <i>Aptosimum procumbens</i> (Lehm.) Burch. ex Steud. Synonyms: <i>Aptosimum depressum</i> Burch. ex Benth., <i>Ohlendorffia procumbens</i> Lehm. | Carpet flower, Karoo violet (E), kankerbos (A)                    | Scrophulariaceae | Herb             | Leaves            | Used as an ointment, as wash for toothache                                                                                                                                                                                                                                                                                                               | Hulley and Van Wyk (2019)                                                                                                                                     | 1         |
| <i>Aptosimum spinescens</i> (L.Bolus) F.E.Weber. Synonyms: <i>Aptosimum abietinum</i> Burch. ex Benth., <i>Aptosimum scaberrimum</i> Schinz      | Sandboega (A)                                                     | Scrophulariaceae | Herb             | Leaves            | Leaves are dried and used as a snuff for headache, stomachache and back ache                                                                                                                                                                                                                                                                             | De Beer and Van Wyk (2011)                                                                                                                                    | 1         |
| <i>Arctotis laevis</i> Thunb.<br>Synonym: <i>Archotis laciniata</i>                                                                              | Kankerbossie (KS)                                                 | Asteraceae       | Herb             | Leaves            | Leaf used as compress for pains                                                                                                                                                                                                                                                                                                                          | Nortje and van Wyk (2015)                                                                                                                                     | 1         |
| <i>Artemisia absinthium</i> L.<br>Synonym: <i>Absinthium majus</i> Geoffr.                                                                       | Wormwood, grand wormwood (E), Groenamara (KS)                     | Asteraceae       | Herb             | Leaves            | Leaf used as compress for pain and backache. Leaves can be chewed or infused for the treatment of stomachache and menstruation pains                                                                                                                                                                                                                     | Nortje and van Wyk (2015); Hulley and Van Wyk (2019)                                                                                                          | 2         |
| <i>Artemisia afra</i> Jacq. ex Willd.<br>Synonyms: <i>Absinthium ponticum</i> (L.) Garsault, <i>Absinthium tenuifolium</i> Gaterau               | Wild wormwood, African wormwood (E), Wildeals (KS), Mhlonyane (Z) | Asteraceae       | Shrub            | Leaves, stem      | Leaves used as compress with cooking oil to alleviate pain (inflammation). For treating backache and stomach pain. Infusion used for headache and ear-ache. Leaves placed in ear as bud for toothache. An infusion made from a handful of the leaves can be taken daily to treat headache. Leaves are made into poultice for inflammation and rheumatism | Nortje and van Wyk (2015); De Beer and Van Wyk (2011); Cooposamy and Naidoo (2012); Hulley and Van Wyk (2019); Thring and Weitz (2006); Mintsu Mi Nzue (2009) | 6         |
| <i>Asclepias crispa</i> P.J.Bergius.<br>Synonyms: <i>Asclepias sabulosa</i>                                                                      | Bitter Root (E), bitterhout (A), Witvergeet (KS)                  | Apocynaceae      | Herb             | Roots             | The root used with a clove as snuff for headache, root chewed and placed in a tooth                                                                                                                                                                                                                                                                      | Nortje and van Wyk (2015); Van Wyk et al. (2008);                                                                                                             | 3         |

| Botanical name                                                                                                                                           | *Common name                                                                                                                                                       | Family        | Life-form | #Part used             | Application                                                                                                                                      | Reference                                                                    | Nm |
|----------------------------------------------------------------------------------------------------------------------------------------------------------|--------------------------------------------------------------------------------------------------------------------------------------------------------------------|---------------|-----------|------------------------|--------------------------------------------------------------------------------------------------------------------------------------------------|------------------------------------------------------------------------------|----|
| Schltr., <i>Asclepias sinuosa</i><br>Burm.f.                                                                                                             |                                                                                                                                                                    |               |           |                        | for toothache. Root decoctions used for toothache and stomachache. Root infusion is used as a wash for the treatment of rheumatism               | Hulley and Van Wyk (2019)                                                    |    |
| <i>Asparagus exuvialis</i> Burch.                                                                                                                        | Nkwangulatilo (Xitsonga)                                                                                                                                           | Asparagaceae  | Climber   | Root                   | Root decoction is used for back pains                                                                                                            | Tshikalange et al. (2016)                                                    | 1  |
| <i>Asparagus laricinus</i> Burch.<br>Synonyms: <i>Asparagus angolensis</i> Baker,<br><i>Protasparagus laricinus</i> (Burch.) Oberm.                      | Bushveld Asparagus (E),<br>Isgoba, Uvucu (Z)                                                                                                                       | Asparagaceae  | Shrub     | ns                     | Remedy for internal side pains in children                                                                                                       | Mhlongo and Van Wyk (2019)                                                   | 1  |
| <i>Athrixia phyllicoides</i> DC.                                                                                                                         | Bushman's tea (E),<br>Boesmanstee (A),<br>icholocholo, its'helo,<br>Inkalane, Ishanelo,<br>umtshanela (Z)                                                          | Asteraceae    | Shrub     | Leaves                 | Leaves are used with roots of <i>Athrixia elata</i> in decoctions for bathing sore feet. Musculo-skeletal (inflammation). For relieving headache | Watt and Breyer-Brandwijk (1962); Mhlongo and Van Wyk (2019); Mbanjwa (2020) | 3  |
| <i>Azanza garckeana</i> (F.Hoffm.)<br>Exell & Hillc. Synonyms:<br><i>Bupariti garckeana</i> (F.Hoffm.)<br>Rothm., <i>Thespesia garckeana</i><br>F.Hoffm. | Rhodesian tree-hibiscus,<br>slime-apple, snot-apple,<br>tree-hibiscus (E),<br>slymappel, snotappel (A),<br>morôbja, morôja, morôjwa<br>(TW), mutogwe (V)           | Malvaceae     | Tree      | Stem-bark              | Stem bark is used to treat painful joints in aged individuals                                                                                    | Mongalo and Makhafola (2018)                                                 | 1  |
| <i>Azima tetracantha</i> Lam.<br>Synonyms: <i>Azima angustifolia</i><br>DC., <i>Monetia barlerioides</i><br>L'Hér.                                       | Beehanger, Bee-sting Bush,<br>Four Thorns, Stink Bush,<br>Needle Bush (E),<br>Byangelbos, Naaldbos (A),<br>Icegeceya (X), Murunda (V),<br>isiKhumukele, Gecaya (Z) | Salvadoraceae | Shrub     | Roots                  | Roots are used for toothache. The sap is used for toothache                                                                                      | Gerstner (1941);<br>Corrigan et al. (2011)                                   | 2  |
| <i>Baccharoides adoensis</i><br>(Sch.Bip. ex Walp.) H.Rob.<br>Synonyms: <i>Ascaricida adoensis</i>                                                       | innyathelo, inyathelo ,<br>uhlonyane (Z)                                                                                                                           | Asteraceae    | Herb      | Leaves,<br>stem, roots | Decoctions from leaves and stem are used for stomach cramps, nervous spasms of                                                                   | Watt and Breyer-Brandwijk (1962); Pujol                                      | 3  |

| Botanical name                                                                                                                          | *Common name                                                                                    | Family     | Life-form | #Part used  | Application                                                                                                                                                                                                                                                                                                                                                             | Reference                                                                                                                                 | Nm |
|-----------------------------------------------------------------------------------------------------------------------------------------|-------------------------------------------------------------------------------------------------|------------|-----------|-------------|-------------------------------------------------------------------------------------------------------------------------------------------------------------------------------------------------------------------------------------------------------------------------------------------------------------------------------------------------------------------------|-------------------------------------------------------------------------------------------------------------------------------------------|----|
| Steetz, <i>Vernonia polymorpha</i> var. <i>polymorpha</i>                                                                               |                                                                                                 |            |           |             | the stomach, and backbone pain. Root decoctions are taken for chest pain                                                                                                                                                                                                                                                                                                | (1990); Hutchings et al. (1996)                                                                                                           |    |
| <i>Ballota africana</i> (L.) Benth. Synonyms: <i>Marrubium africanum</i> L., <i>Stachys africana</i> (L.) Kuntze                        | Cape horehound, Cat Herb, Catmint (E), Kattekruie, Kattekruie, kattedkruie (A), Kattekruie (KS) | Lamiaceae  | Herb      | Leaves      | Leaves are used for the treatment of arthritis. As compress on sick children's feet, to get rid of the pains, on head, for headache, on cheek for toothache. Leaf infusion is given for stomach pain and headache. For washing aching legs. Applied as an ointment to pain and inflammation as well as backache. Leaf infusion used externally for headache, rheumatism | Watt and Breyer-Brandwijk (1962); Nortje and van Wyk (2015); Van Wyk et al. (2008); De Beer and Van Wyk (2011); Hulley and Van Wyk (2019) | 5  |
| <i>Bauhinia galpinii</i> N.E.Br. Synonyms: <i>Bauhinia galpinii</i> var. <i>galpinii</i> , <i>Perlebia galpinii</i> (N.E.Br.) A.Schmitz | Pride of De Kaap (E), Vlam-van-die-Vlakte (A), Mutswiriri (V)                                   | Fabaceae   | Tree      | Bark, roots | Maceration of the bark and root is drunk for stomach spasms                                                                                                                                                                                                                                                                                                             | Arnold and Gulumian (1984)                                                                                                                | 1  |
| <i>Berchemia discolor</i> (Klotzsch) Hemsl. Synonyms: <i>Phyllogeiton discolor</i> , <i>Scutia discolor</i>                             | Bird plum, wild almond (E), bruinivoor (A), umhlungulo, umumu, uvuku (Z)                        | Rhamnaceae | Tree      | Bark        | Bark is used for toothache                                                                                                                                                                                                                                                                                                                                              | Hutchings et al. (1996)                                                                                                                   | 1  |
| <i>Berchemia zeyheri</i> (Sond.) Grubov. Synonyms: <i>Phyllogeiton zeyheri</i> , <i>Rhamnus zeyheri</i>                                 | Ivory wood, red ebony (E), Dinee (SL), umgologolo, umncaka, umneyi, umnini (Z)                  | Rhamnaceae | Tree      | Bark, roots | Bark infusions are administered as enemas for pains in the back and for rectal ulceration in children. Roots are used as remedy to relieve headache                                                                                                                                                                                                                     | Mabogo (1990); Watt and Breyer-Brandwijk (1962); Shai et al. (2020)                                                                       | 3  |
| <i>Berkheya bipinnatifida</i> (Harv.) Roessler. Synonyms: <i>Stobaea</i>                                                                | Ubani (Z)                                                                                       | Asteraceae | Shrub     | ns          | Chest pain in children                                                                                                                                                                                                                                                                                                                                                  | Mhlongo and Van Wyk (2019)                                                                                                                | 1  |

| Botanical name                                                                                                                                        | *Common name                                                                                      | Family         | Life-form | #Part used          | Application                                                                                                                                                                                                                                                                                                             | Reference                                                                                                               | Nm |
|-------------------------------------------------------------------------------------------------------------------------------------------------------|---------------------------------------------------------------------------------------------------|----------------|-----------|---------------------|-------------------------------------------------------------------------------------------------------------------------------------------------------------------------------------------------------------------------------------------------------------------------------------------------------------------------|-------------------------------------------------------------------------------------------------------------------------|----|
| <i>bipinnatifida</i> Harv., <i>Stobaea seminivea</i> DC.                                                                                              |                                                                                                   |                |           |                     |                                                                                                                                                                                                                                                                                                                         |                                                                                                                         |    |
| <i>Berkheya</i> sp.                                                                                                                                   | ikambi lomkuhlane, isidawo, ukakaka, ulimi-lwenkomo, ulimi-lwenyathi, ushaqa, ushwawu (Z)         | Asteraceae     | Shrub     | Leaves, roots       | Roots are mixed with pounded leaves in cold water and applied as foment for rheumatism. As a poultice to relieve aches and pains                                                                                                                                                                                        | Watt and Breyer-Brandwijk (1962); Pujol (1990)                                                                          | 2  |
| <i>Berkheya umbellata</i> DC.                                                                                                                         | Geelklossiedissel (A), Ikhakhasi, Ulimi lwenkomo (Z)                                              | Asteraceae     | Shrub     | ns                  | Musculo-skeletal (inflammation)                                                                                                                                                                                                                                                                                         | Mhlongo and Van Wyk (2019)                                                                                              | 1  |
| <i>Berula erecta</i> subsp. <i>thunbergii</i> (DC.) B.L.Burtt. Synonyms: <i>Berula thunbergii</i> (DC.) H.Wolff, <i>Berula erecta</i> (Huds.) Coville | Toothache Root, Water Parsnip (E)                                                                 | Apiaceae       | Herb      | ns                  | Used for the treatment of toothache                                                                                                                                                                                                                                                                                     | Hulley and Van Wyk (2019)                                                                                               | 1  |
| <i>Bidens pilosa</i> L. Synonyms: <i>Bidens alausensis</i> Kunth, <i>Bidens cannabina</i> Lam.                                                        | Black jack, Spanish needles (E), knapsekerel, wewenaars (A), inongwe (X), amalenjane, uqadolo (Z) | Asteraceae     | Herb      | Stem, seeds, leaves | Young shoots are chewed for rheumatism. Burnt seed is rubbed into scarifications on the sides of the body for the relief of pain. Leaf decoction (1/4 <sup>th</sup> a cup) is taken twice daily to treat arthritis. Squeezed liquid from leaves is used as ear drops to relieve ear-ache. For relieving menstrual pains | Watt and Breyer-Brandwijk (1962); Hutchings et al. (1996); Bhat (2014); Mokganya and Tshisikhawe (2019); Mbanjwa (2020) | 5  |
| <i>Blepharis capensis</i> (L.f.) Pers. Synonyms: <i>Acanthodium capense</i> (L.f.) Nees, <i>Blepharis capensis</i> var. <i>latibracteata</i> Oberm.   | scorpion's tail (E), skerpioenstert (A), ubuHlungu besigcawu (X)                                  | Acanthaceae    | Shrub     | ns                  | A poultice is applied onto teeth to treat toothache                                                                                                                                                                                                                                                                     | Hulley and Van Wyk (2019)                                                                                               | 1  |
| <i>Boophone disticha</i> (L. f.) Herb. Synonyms: <i>Amaryllis disticha</i>                                                                            | Cape poison bulb, sore-eye flower (E), gitbol, gifui, kopseerblom (A), incotho,                   | Amaryllidaceae | Herb      | Bulbs               | Bulb decoctions are administered by mouth or as enemas to adults for                                                                                                                                                                                                                                                    | Watt and Breyer-Brandwijk (1962); Hutchings                                                                             | 5  |

| Botanical name                                                                                                                                           | *Common name                                                                                                                             | Family         | Life-form | #Part used       | Application                                                                                                                                                                                                                                                                                                                                                                                             | Reference                                                                                          | Nm |
|----------------------------------------------------------------------------------------------------------------------------------------------------------|------------------------------------------------------------------------------------------------------------------------------------------|----------------|-----------|------------------|---------------------------------------------------------------------------------------------------------------------------------------------------------------------------------------------------------------------------------------------------------------------------------------------------------------------------------------------------------------------------------------------------------|----------------------------------------------------------------------------------------------------|----|
| L.f., <i>Boophone longipedicellata</i><br>Pax                                                                                                            | incwadi, Ingotho,<br>Umayime (Z)                                                                                                         |                |           |                  | headaches, sharp chest pains and persistent bladder pains. Given to patients suffering from <i>inkwatshu</i> , a condition characterised by the development of cramp-like pains in the calf muscles associated with a feeling of tightness in the fingers and toes. Moistened bulb scales used for rheumatic pain. Analgesic (lower back aches). Bulb leaves used as compress for pain and inflammation | et al. (1996); Mhlongo and Van Wyk (2019); Coopoosamy and Naidoo (2012); Hulley and Van Wyk (2019) |    |
| <i>Boophone haemanthoides</i><br>F.M.Leight.                                                                                                             | Namaqua century plant (E),<br>gifbol, kwaslelie (A)                                                                                      | Amaryllidaceae | Herb      | Bulbs            | Bulb used as a compress on<br>paining knees                                                                                                                                                                                                                                                                                                                                                             | De Beer and Van<br>Wyk (2011)                                                                      | 1  |
| <i>Boscia oleoides</i> (Burch. ex DC.)<br>Toelken. Synonyms: <i>Capparis<br/>clutiifolia</i> Burch. ex DC.,<br><i>Capparis oleoides</i> Burch. ex<br>DC. | Bastard Shepherd Tree,<br>Karoo Shepherd Tree (E),<br>Karoo-witgat, witgatboom<br>(A), Umgqamagqama,<br>Umgqomo-gqomo,<br>Umphunzisa (X) | Capparaceae    | Tree      | Roots            | Root is mixed with<br>swartstorm root, bruised and<br>drunk for stomach pain.<br>Remedy for back pain                                                                                                                                                                                                                                                                                                   | Van Wyk et al.<br>(2008)                                                                           | 1  |
| <i>Bowiea volubilis</i> Harv. =<br><i>Bowiea volubilis</i> Harv. Ex<br>Hook.f. subsp. <i>volubilis</i>                                                   | Climbing onion (E),<br>knolklimop (A), umgaqana<br>(X), ugibisisila; iguleni (Z)                                                         | Asparagaceae   | Herb      | Bulbs            | Used as remedy for headache<br>and inflammation. Remedy<br>for backache and muscle pain                                                                                                                                                                                                                                                                                                                 | Maroyi (2017);<br>Philander (2011)                                                                 | 2  |
| <i>Brachylaena discolor</i> DC.<br>Synonyms: <i>Brachylaena<br/>discolor</i> subsp. <i>discolour</i> ,<br><i>Brachylaena natalensis</i> Sch.Bip.         | Coast silver oak (E),<br>Kusvaalbos (A), Phahla<br>(Z), Mphahla (NS),<br>umPhahla (X)                                                    | Asteraceae     | Tree      | ns               | Used for stomachache                                                                                                                                                                                                                                                                                                                                                                                    | Corrigan et al.<br>(2011)                                                                          | 1  |
| <i>Brachylaena elliptica</i> (Thunb.)<br>Less. Synonyms: <i>Brachylaena<br/>dentata</i> ; <i>Tarchonamhus<br/>ellipticus</i>                             | Bitter-leaf (E), bitterblaar,<br>suurbos (A), iphahle,<br>isiduli-ehlathi,<br>uhlunguhlungu (Z)                                          | Asteraceae     | Tree      | Leaves,<br>roots | Leaf infusions are<br>administered as enemas for<br>backache. Decorticated root                                                                                                                                                                                                                                                                                                                         | Watt and Breyer-<br>Brandwijk<br>(1962); Hutchings<br>et al. (1996)                                | 2  |

| Botanical name                                                                                                                        | *Common name                                                                                       | Family           | Life-form | #Part used          | Application                                                                                                                                                                                                              | Reference                                                                              | Nm |
|---------------------------------------------------------------------------------------------------------------------------------------|----------------------------------------------------------------------------------------------------|------------------|-----------|---------------------|--------------------------------------------------------------------------------------------------------------------------------------------------------------------------------------------------------------------------|----------------------------------------------------------------------------------------|----|
|                                                                                                                                       |                                                                                                    |                  |           |                     | infusions are taken as emetics for pains in the side                                                                                                                                                                     |                                                                                        |    |
| <i>Brackenridgea zanguebarica</i> Oliv. Synonyms: <i>Brackenridgea bussei</i> Gilg, <i>Pleuroridgea zanguebarica</i> (Oliv.) Tiegh.   | yellow peeling plane (E), Mutavhatsindi (V)                                                        | Ochnaceae        | Tree      | Roots               | Powdered roots is rubbed on after treatment with <i>Aloe chabaudii</i> to relieve swollen ankles                                                                                                                         | Arnold and Gulumian (1984)                                                             | 1  |
| <i>Bridelia cathartica</i> Bertol. Synonyms: <i>Bridelia cathartica</i> subsp. <i>cathartica</i> , <i>Bridelia schlechteri</i> Hutch. | umKhawulangazi (Z)                                                                                 | Phyllanthaceae   | Tree      | Leaves              | An infusion made from the leaves to soak feet to relieve pain                                                                                                                                                            | Corrigan et al. (2011)                                                                 | 1  |
| <i>Bridelia micrantha</i> (Hochst.) Baill. Synonyms: <i>Bridelia stenocarpa</i> Müll.Arg., <i>Candelabria micrantha</i> Hochst.       | Coastal goldenleaf (E), bruinstinkhout (A), Ditsere (SL), munzere (V) umhlamagwababa, umshonge (Z) | Phyllanthaceae   | Tree      | Roots, bark, leaves | Roots are used for severe epigastric pain and rubbed into the scalp for headache. Bark used for toothache and leaves for painful eyes and headache. Bark decoction is used to rinse the oral cavity to relieve toothache | Hutchings et al. (1996); Mabogo (1990); Shai et al. (2020), Arnold and Gulumian (1984) | 4  |
| <i>Brunsvigia grandiflora</i> Lindl. Synonyms: <i>Amaryllis banksiana</i> Lindl., <i>Brunsvigia sphaerocarpa</i> Baker                | Giant Candelabra Flower (E), isichwe (X)                                                           | Amaryllidaceae   | Herb      | Leaves              | Leaves are used externally during circumcision of boys to prevent inflammation                                                                                                                                           | Bhat and Jacobs (1995)                                                                 | 1  |
| <i>Brunsvigia josephinae</i> (Delile) Ker Gawl. Synonyms: <i>Amaryllis gigantea</i> Marum, <i>Coburgia josephinae</i> (Delile) Herb.  | Candelabra lily (E), kandelaarblom, lantanter (A)                                                  | Amaryllidaceae   | Herb      | ns                  | Used as a compress for pain and inflammatio                                                                                                                                                                              | Hulley and Van Wyk (2019)                                                              | 1  |
| <i>Buddleja saligna</i> Willd. Synonyms: <i>Buddleja salicifolia</i> Jacq., <i>Nuxia saligna</i> (Willd.) Benth.                      | False olive (E), witolien (A), lelothwane (SS), mothlware (TW), unGqeba (X), iGqeba-elimhlope (Z)  | Scrophulariaceae | Tree      | Leaves              | Leaf infusion used in treatment of teething problems                                                                                                                                                                     | Hulley and Van Wyk (2019)                                                              | 1  |
| <i>Bulbine abyssinica</i> A.Rich. Synonyms: <i>Bulbine asphodeloides</i> var. <i>filifolioides</i>                                    | Bushy bulbine (E), geelkatstert, wildekopieva (A), uyakayakana, intelezi (Xhosa); ibhucu (Zulu);   | Xanthorrhoeaceae | Herb      | Leaves, roots       | For relieving menstrual pain. Root is used for back pain                                                                                                                                                                 | Maroyi (2017); Van Wyk et al. (2008)                                                   | 2  |

| Botanical name                                                                                                               | *Common name                                                                                                                                                                                                             | Family           | Life-form | #Part used                | Application                                                                                                                                                 | Reference                                                                         | Nm |
|------------------------------------------------------------------------------------------------------------------------------|--------------------------------------------------------------------------------------------------------------------------------------------------------------------------------------------------------------------------|------------------|-----------|---------------------------|-------------------------------------------------------------------------------------------------------------------------------------------------------------|-----------------------------------------------------------------------------------|----|
| De Wild., <i>Bulbine xanthobotrys</i><br>Engl. & Gilg                                                                        |                                                                                                                                                                                                                          |                  |           |                           |                                                                                                                                                             |                                                                                   |    |
| <i>Bulbine alooides</i> (L.) Willd.<br>Synonyms: <i>Bulbine acaulis</i> L.,<br><i>Anthericum alooides</i> L.                 | Kopiva (A), Waterpypie,<br>Wildekopiva (A), Ibhucu<br>(Z)                                                                                                                                                                | Xanthorrhoeaceae | Herb      | Tubers                    | Tubers were used for<br>rheumatism by the Xhosa<br>and by Dutch settlers in the<br>Cape                                                                     | Watt and Breyer-<br>Brandwijk<br>(1962); Hutchings<br>et al. (1996)               | 2  |
| <i>Bulbine frutescens</i> (L.) Willd.                                                                                        | Stalked bulbine, snake<br>flower (E), Geneesbos(sie)<br>(KS)                                                                                                                                                             | Xanthorrhoeaceae | Shrub     | Leaves                    | Fleshy part of leaf and leaf<br>juice used for pains and<br>sprained ankles                                                                                 | Nortje and van<br>Wyk (2015)                                                      | 1  |
| <i>Bulbine latifolia</i> (L.f.) Spreng.<br>Synonyms: <i>Bulbine<br/>brunsvigiaefolia</i> , <i>Bulbine<br/>natalensis</i>     | Broad-leaved bulbine, red<br>carrot (E), rooiwortel,<br>geelkopieva (A), incelwane<br>(X), ibhucu (Z)                                                                                                                    | Xanthorrhoeaceae | Herb      | Tubers,<br>roots          | Xhosa and Dutch settlers use<br>tubers for rheumatism. Root<br>infusions or decoctions are<br>used for rheumatism. Roots<br>are used for treating arthritis | Hutchings et al.<br>(1996); Van Wyk<br>and Gericke<br>(2000); Philander<br>(2011) | 3  |
| <i>Cadaba aphylla</i> (Thunb.) Wild.<br>Synonyms: <i>Cadaba juncea</i><br>Szyszyl., <i>Cleome sodiroi</i> Gilg<br>ex Heilbr. | leafless cadaba, leafless<br>wormbush (E), swartstorm,<br>doubos, douwurbos,<br>gifhoutjie, rooistorm,<br>stormbos (A), mfitshwana,<br>mhitshwana,<br>monnamontsho (TW),<br>mudiatsiwana, tshikuni (V),<br>usitorhom (X) | Capparaceae      | Shrub     | Roots                     | Root infusion used for<br>treating backache,<br>constipation, stomachache,<br>rheumatism, menstruation<br>pains, general pain and<br>inflammation           | Hulley and Van<br>Wyk (2019)                                                      | 1  |
| <i>Caesalpinia decapetala</i> (Roth.)<br>Alston. Synonym: <i>Biancaea<br/>decapetela</i> (Roth) O. Deg.                      | Mauritius thorn (E),<br>Luanakha (V)                                                                                                                                                                                     | Fabaceae         | Shrub     | Roots                     | Roots are boiled and the<br>mixture drunk for treating<br>dysmenorrhoe                                                                                      | Mahwasane et al.<br>(2013)                                                        | 1  |
| <i>Canna indica</i> L. Synonyms:<br><i>Canna achiras</i> Gillies ex<br>D.Don, <i>Xyphostylis lutea</i> (Mill.)<br>Raf.       | African arrowroot, edible<br>canna, purple arrowroot,<br>Sierra Leone arrowroot (E),<br>kanna, kennablare (A)                                                                                                            | Cannaceae        | Herb      | Leaves                    | Leaves used as compress for<br>pain and inflammation,<br>backache, rheumatism, sores,<br>headache, toothache and<br>sprains                                 | Hulley and Van<br>Wyk (2019)                                                      | 1  |
| <i>Cannabis sativa</i> L. Synonyms:<br><i>Cannabis chinensis</i> Delile,                                                     | Marijuana (E), dagga (A),<br>Umya, Matakwane,<br>intsangu (X),                                                                                                                                                           | Cannabaceae      | Herb      | Whole<br>plant,<br>leaves | Whole plant is used to treat<br>excessive headache. Leaf<br>decoction is taken to relieve                                                                   | Mongalo and<br>Makhafola<br>(2018); Bhat                                          | 3  |

| Botanical name                                                                                                                 | *Common name                                                                                                                                                     | Family      | Life-form | #Part used | Application                                                                                                                                                                                    | Reference                                                                                           | Nm |
|--------------------------------------------------------------------------------------------------------------------------------|------------------------------------------------------------------------------------------------------------------------------------------------------------------|-------------|-----------|------------|------------------------------------------------------------------------------------------------------------------------------------------------------------------------------------------------|-----------------------------------------------------------------------------------------------------|----|
| <i>Cannabis sativa</i> var. <i>indica</i> (Lam.) Wehmer                                                                        | Matekwane/Patse (NS), Nsangu (Z)                                                                                                                                 |             |           |            | chronic pain. Used as painkillers and for toothache                                                                                                                                            | (2013); Mbanjwa (2020)                                                                              |    |
| <i>Canthium spinosum</i> (Klotzsch ex Eckl. & Zeyh.) Kuntze. Synonym: <i>Plectronia spinosa</i> Klotzsch                       | Thorny turkey-berry, coastal turkey-berry, coastal canthium (E), Ikhanyisani, Isihlungu sankonka, Ubuchopho bekati, Ubuchopho benja, Udlozini, Umhlabandlazi (Z) | Rubiaceae   | Shrub     | ns         | Analgesic (sharp internal body pains)                                                                                                                                                          | Mhlongo and Van Wyk (2019)                                                                          | 1  |
| <i>Capparis tomentosa</i> Lam. Synonyms: <i>Capparis alexandrae</i> Chiov., <i>Capparis subtomentosa</i> De Wild.              | Woolly caper bush (E), Wollerige kapperbos (A), inkunzi-ebomvu, iqwaningi, umqoqolo (Z)                                                                          | Capparaceae | Tree      | Roots      | The roots boiled in water half a cupful of the infusion is taken three times a day. Powdered roots are rubbed on swollen ankles. Roots are burned and the smoke is inhaled to relieve headache | Hutchings et al. (1996); Pujol (1990); Watt and Breyer-Brandwijk (1962); Arnold and Gulumian (1984) | 4  |
| <i>Carissa bispinosa</i> (L.) Desf. ex Brenan                                                                                  | Forest num-num (E), bosnoemnoem (A), Amathungulu (Z)                                                                                                             | Apocynaceae | Shrub     | ns         | Analgesic (headache)                                                                                                                                                                           | Mhlongo and Van Wyk (2019)                                                                          | 1  |
| <i>Carissa macrocarpa</i> (Eckl.) A.DC. Synonyms: <i>Carissa africana</i> A.DC., <i>Jasminonerium africanum</i> (A.DC.) Kuntze | Natal plum, big num-num (E), Amathungulu (Z)                                                                                                                     | Apocynaceae | Shrub     | ns         | Analgesic (headache)                                                                                                                                                                           | Mhlongo and Van Wyk (2019)                                                                          | 1  |
| <i>Carissa spinarum</i> L. Synonyms: <i>Antura edulis</i> Forssk., <i>Carissa edulis</i> (Forssk.) Vahl.                       | Simple-spined num-num, climbing num-num, small num-num (E), kleinnoemnoem (A), mothokolo (NS), Dithokolo (SL), murungulu (V)                                     | Apocynaceae | Shrub     | Roots      | Roots are medicine used for body pains                                                                                                                                                         | Shai et al. (2020)                                                                                  | 1  |
| <i>Carpobrotus dimidiatus</i> (Haw.) L. Bolus. Synonyms: <i>Carpobrotus juritzii</i> (L.Bolus)                                 | Natal sour fig (E), Natalse suurvy/strandvy (A), Ibohloholo lesilungu (Z)                                                                                        | Aizoaceae   | Creepers  | ns         | Musculo-skeletal inflammation. Used as poultice for painful and swollen feet                                                                                                                   | Mhlongo and Van Wyk (2019); Mbanjwa (2020)                                                          | 2  |



| Botanical name                                                                                                                                                  | *Common name                                                                                                                                              | Family        | Life-form | #Part used               | Application                                                                                                                           | Reference                                                                                                   | Nm |
|-----------------------------------------------------------------------------------------------------------------------------------------------------------------|-----------------------------------------------------------------------------------------------------------------------------------------------------------|---------------|-----------|--------------------------|---------------------------------------------------------------------------------------------------------------------------------------|-------------------------------------------------------------------------------------------------------------|----|
| L.Bolus, <i>Mesembryanthemum juritzii</i> L.Bolus                                                                                                               |                                                                                                                                                           |               |           |                          |                                                                                                                                       |                                                                                                             |    |
| <i>Carpobrotus edulis</i> (L.) N.E.Br. Synonyms: <i>Abryanthemum edule</i> (L.) Rothm., <i>Mesembryanthemum edule</i> L.                                        | Sour fig, Cape fig, Hottentots fig (E), ghaukum, ghoenavy, Hottentotsvy, Kaapsevy, perdevy, rankvy, suurvy, vyerank (A), ikhambilamabulawo, umgongozi (Z) | Aizoaceae     | Creeper   | Leaves                   | To treat painful lungs. Leaf juice gargled for sore throat, teething problems and ear-ache as well as stomachache                     | Van Wyk et al. (2008); Hulley and Van Wyk (2019); Philander (2011); Mogale et al. (2019)                    | 4  |
| <i>Cassine transvaalensis</i> (Burt Davy) Codd. Synonyms: <i>Elaeodendron transvaalense</i> (Burt Davy) R.H.Archer, <i>Salacia transvaalensis</i> Burt Davy     | Mulumana-mana, mukuvhazwihi (V)                                                                                                                           | Celastraceae  | Tree      | Bark, roots              | Bark infusion is drunk twice daily for stomachache. maceration of the powdered roots is drunk to relieve stomachache in male          | Arnold and Gulumian (1984)                                                                                  | 1  |
| <i>Cassytha ciliolata</i> Nees. Synonyms: <i>Cassytha capensis</i> Meisn., <i>Cassytha triflora</i> E.Mey.                                                      | Devil's Tresses, False Dodder (E), Bôjaantou (KS)                                                                                                         | Lauraceae     | Climber   | Leaves                   | Leaf decoction is used for pains, snuff for headache                                                                                  | Nortje and van Wyk (2015)                                                                                   | 1  |
| <i>Catharanthus roseus</i> (L.) G.Don. Synonyms: <i>Lochnera rosea</i> , <i>Pervinca rosea</i> (L.) Gaterau, <i>Vinca rosea</i> var. <i>alba</i> (G. Don) Sweet | Periwinkle, vinca (E), Imbali yamathuna, Imbali yesibaya, Isona, Ubani bezwe, Umangashi (Z)                                                               | Apocynaceae   | Herb      | Leaves, roots, milky sap | Leaves are used for the rheumatism. Milky sap is used for insect bites. Roots are used for toothache. Analgesic (headache; toothache) | Watt and Breyer-Brandwijk (1962); Hutchings et al. (1996); Mhlongo and Van Wyk (2019); Mogale et al. (2019) | 4  |
| <i>Cavacoa aurea</i> (Cavaco) J. Léonard. Synonym: <i>Grossera aurea</i> Cavaco                                                                                 | Natal hickory (E), Natalokkerneut (A), umbhuku, umbuku (Z)                                                                                                | Euphorbiaceae | Tree      | Roots                    | Root infusions are taken to ease pain                                                                                                 | Palmer and Pitman (1961)                                                                                    | 1  |
| <i>Celtis africana</i> Burm.f. Synonyms: <i>Celtis burmanni</i>                                                                                                 | white stinkwood (E), witstinkhout (A), Modutu (TW), umVumvu (X),                                                                                          | Cannabaceae   | Tree      | Bark                     | Bark decoction is used as nose and ear drops to relieve                                                                               | Arnold and Gulumian (1984)                                                                                  | 1  |

| Botanical name                                                                                                                                                  | *Common name                                                                                                        | Family         | Life-form | #Part used                | Application                                                                                                                                                                         | Reference                                                                                  | Nm |
|-----------------------------------------------------------------------------------------------------------------------------------------------------------------|---------------------------------------------------------------------------------------------------------------------|----------------|-----------|---------------------------|-------------------------------------------------------------------------------------------------------------------------------------------------------------------------------------|--------------------------------------------------------------------------------------------|----|
| Planch., <i>Celtis vesiculosa</i><br>Hochst. ex Planch.                                                                                                         | Mumvumvu, Mpopano (V),<br>uSinga lwesalukazi (Z)                                                                    |                |           |                           | toothache due to mandibular<br>and maxillar pains                                                                                                                                   |                                                                                            |    |
| <i>Cenchrus ciliaris</i> L. Synonyms:<br><i>Cenchrus bulbosus</i> Fresen.,<br><i>Cenchrus rufescens</i> Desf.                                                   | Buffalo grass<br>(E), bloubuffel sgras (A),<br>idungamuzi, indungulu (Z)                                            | Poaceae        | Herb      | Stem/runne<br>r           | Underground runners are<br>used for body pain and<br>dysmenorrhoea (painful<br>menstruation)                                                                                        | Pujol (1990);<br>Gebashe et al.<br>(2019)                                                  | 2  |
| <i>Centaurea benedicta</i> (L.) L.<br>Synonyms: <i>Benedicta officinalis</i><br>Bernh., <i>Cnicus benedictus</i> L.<br><i>Epitrachys microcephala</i><br>K.Koch | St. Benedict's thistle,<br>blessed thistle, holy thistle,<br>spotted thistle (E),<br>karmedik, doringbietoea<br>(A) | Asteraceae     | Herb      | Leaves,<br>stem, ns       | Infusions used for the<br>treatment of stomachache                                                                                                                                  | Hulley and Van<br>Wyk (2019);<br>Mintsa Mi Nzue<br>(2009)                                  | 2  |
| <i>Centella asiatica</i> (L.) Urb.<br>Synonyms: <i>Centella hirtella</i><br>Nannf., <i>Hydrocotyle biflora</i> P.<br>Vell.                                      | Marsh Pennywort (E),<br>kleinkattekruid,<br>varkoortjies (A),<br>Umangobozane, Isgoba (Z)                           | Apiaceae       | Herb      | Whole<br>plant,<br>leaves | Fresh plant decoction is<br>taken orally for rheumatoid<br>arthritis. Analgesic (sharp<br>internal body pains). Fresh<br>leaves used as ear plugs to<br>relief ear pain in children | Van Wyk and<br>Gericke (2000);<br>Mhlongo and Van<br>Wyk (2019); Van<br>Wyk et al. (2008)  | 3  |
| <i>Centella dolichocarpa</i> M.Schub.<br>& B.-E.van Wyk                                                                                                         | Skillpadbossie (A)                                                                                                  | Apiaceae       | Herb      | Leaves                    | Used for arthritis                                                                                                                                                                  | Philander (2011)                                                                           | 1  |
| <i>Cephalaria zeyheriana</i> Szabó.<br>Synonym: <i>Cephalaria ustulata</i>                                                                                      | False scabiosa (E), Uzondle<br>(Z)                                                                                  | Caprifoliaceae | Herb      | Roots                     | Root decoctions are for any<br>unaccountable swellings and<br>pains                                                                                                                 | Watt and Breyer-<br>Brandwijk (1962)                                                       | 1  |
| <i>Chamarea capensis</i> (Thunb.)<br>Eckl. & Zeyh. Synonyms:<br><i>Anethum capense</i> Thunb.,<br><i>Foeniculum capense</i> DC.                                 | Cape Caraway, Chamare<br>(E), Finkelwortel,<br>Vinkelbol (A)                                                        | Apiaceae       | Herb      | Roots                     | Root is chewed to treat<br>stomachache                                                                                                                                              | Hulley and Van<br>Wyk (2019)                                                               | 1  |
| <i>Chamarea longipedicellata</i><br>B.L.Burt                                                                                                                    | Vinkel (A)                                                                                                          | Apiaceae       | Herb      | Roots                     | Roots is used to relieve<br>headache                                                                                                                                                | De Beer and Van<br>Wyk (2011)                                                              | 1  |
| <i>Chironia baccifera</i> L.<br>Synonyms: <i>Chironia parviflora</i><br>Salisb., <i>Chironia baccifera</i> var.<br><i>elongata</i> E.Mey.                       | Christmas berry (E),<br>aambeibossie, bitterbossie<br>(A), Bitterbos (KS)                                           | Gentianaceae   | Shrub     | Leaves,<br>whole plant    | Used for backache,<br>rheumatism, arthritis and<br>woman ailments (menstrual<br>pains). Infusions used for<br>stomach ailments, pain and                                            | Nortje and van<br>Wyk (2015);<br>Hulley and Van<br>Wyk (2019);<br>Mintsa Mi Nzue<br>(2009) | 3  |

| Botanical name                                                                                                                                               | *Common name                                                                   | Family         | Life-form | #Part used          | Application                                                                                                                                                                                  | Reference                                                               | Nm |
|--------------------------------------------------------------------------------------------------------------------------------------------------------------|--------------------------------------------------------------------------------|----------------|-----------|---------------------|----------------------------------------------------------------------------------------------------------------------------------------------------------------------------------------------|-------------------------------------------------------------------------|----|
|                                                                                                                                                              |                                                                                |                |           |                     | inflammation, backache and headache                                                                                                                                                          |                                                                         |    |
| <i>Chrysocoma ciliata</i> L.<br>Synonyms: <i>Aster discoideus</i> Sond., <i>Chrysocoma tenuifolia</i> P.J.Bergius                                            | Bitter bush, bitter cowcud (E), beesbos, bitterbos (A)                         | Asteraceae     | Shrub     | Leaves, twigs       | Leaf decoction is used for aching legs. Chew twig for stomach ailments and ulcers, leaves used as bud for toothache                                                                          | De Beer and Van Wyk (2011); Hulley and Van Wyk (2019)                   | 2  |
| <i>Cichorium intybus</i> L.<br>Synonyms: <i>Cichorium balearicum</i> Porta, <i>Cichorium intybus</i> f. <i>rubicunda</i> Farw.                               | Blue dandelion, chicory (E), sigorei, bloublommetjie (A)                       | Asteraceae     | Herb      | ns                  | Used for the treatment of stomach ailments and rheumatism                                                                                                                                    | Hulley and Van Wyk (2019)                                               | 1  |
| <i>Cinnamomum camphora</i> (L.) J.Presl. Synonyms: <i>Camphora officinarum</i> var. <i>glaucescens</i> A.Braun, <i>Cinnamomum officinarum</i> Nees ex Steud. | Camphor (E), Urosalina (Z)                                                     | Lauraceae      | Tree      | Bark                | Used for inflammation                                                                                                                                                                        | Philander (2011)                                                        | 1  |
| <i>Cissampelos capensis</i> L.f.<br>Synonyms: <i>Antizoma capensis</i> (L.f.) Diels, <i>Phyllanthus cinereoviridis</i> Pax                                   | Davidjieswortel, Dawidjieswortel, Fynblaarklimop (A)                           | Menispermaceae | Shrub     | Roots, leaves       | Roots are chewed for severe stomach pain. Root infusions as remedy for toothache and headache. Fresh leaf infusions and decoctions are used for treating pain, backache and stomach ailments | Van Wyk et al. (2008); Hulley and Van Wyk (2019); Mintsu Mi Nzue (2009) | 3  |
| <i>Cissampelos torulosa</i> E.Mey. ex Harv. & Sond. Synonyms: <i>Cissampelos truncatus</i> Engl., <i>Menispermum capense</i> Thunb.                          | Davidjies, Davidjieswortel (A), Ukhaliemele, Ukhaliemele-omkhulu, Umthombo (Z) | Menispermaceae | Shrub     | ns                  | Used for backache                                                                                                                                                                            | Hulley and Van Wyk (2019)                                               | 1  |
| <i>Clausena anisata</i> (Willd.) Hook.f. ex Benth. Synonyms: <i>Clausena inaequalis</i> , <i>Clausena inaequalis</i>                                         | Horsewood (E), basternieshout (A), isifuthu, umnukelambiba, umsanka (Z)        | Rutaceae       | Shrub     | Leaves, bark, roots | Leaf decoctions are used for rheumatism and fevers. Leaf decoctions are taken or inhaled for abdominal pain and toothache                                                                    | Hutchings et al. (1996); Philander (2011)                               | 2  |

| Botanical name                                                                                                                                 | *Common name                                                                                                                 | Family        | Life-form | #Part used            | Application                                                                                                                                                                         | Reference                                                          | Nm |
|------------------------------------------------------------------------------------------------------------------------------------------------|------------------------------------------------------------------------------------------------------------------------------|---------------|-----------|-----------------------|-------------------------------------------------------------------------------------------------------------------------------------------------------------------------------------|--------------------------------------------------------------------|----|
| <i>Clematis brachiata</i> Thunb.<br>Synonyms: <i>Clematis biloba</i> Steud., <i>Clematis triloba</i> var. <i>congensis</i> (A.Chev.) M.Johnson | traveller's joy, old man's beard, wild clematis (E), klimop, lemoenbloeisels (A), ityolo (X), Tshiumbeumbe (V), umdlonzo (Z) | Ranunculaceae | Climber   | Leaves                | Fresh leaves are smoke and inhaled to relieve headache. Leaf decoction at 1 teasppon is drunk thrice daily and team is inhaled to relieve headache                                  | Arnold and Gulumian (1984)                                         | 1  |
| <i>Cliffortia odorata</i> L.f.<br>Synonyms: <i>Cliffortia alnifolia</i> Rchb. <i>Cliffortia odorata</i> var. <i>vera</i> Harv.                 | Wild vine (E), wildewingerd, wildevyerank (A)                                                                                | Rosaceae      | Shrub     | Leaves, roots, stems  | Used for backache, pain and inflammation as well as arthritis                                                                                                                       | Hulley and Van Wyk (2019); Philander (2011); Mintsá Mi Nzue (2009) | 3  |
| <i>Colocasia antiquorum</i> Schott.<br>Synonyms: <i>Colocasia fontanesii</i> Schott, <i>Colocasia tonoiimo</i> Nakai                           | Elephant's ear (E), idumbe (lomfula), idumbi (Z)                                                                             | Araceae       | Herb      | Tubers, roots, leaves | Crushed root decoctions are administered as enemas for stomach trouble. Tubers are used as poultices for rheumatism. Bruised leaves are applied directly to cuts from insect stings | Hutchings et al. (1996); Hulme (1954); Pujol (1990)                | 3  |
| <i>Colophospermum mopane</i> (Benth.) Leonard. Synonym: <i>Copaifera mopane</i> Benth.                                                         | mopane, turpentine tree (E), mopanie (A), mohlanare (NS); mophane (TW)                                                       | Fabaceae      | Tree      | Leaves                | Leaf decoction is drunk for stomachache                                                                                                                                             | Arnold and Gulumian (1984)                                         | 1  |
| <i>Combretum caffrum</i> (Eckl. & Zeyh.) Kuntze. Synonyms: <i>Combretum salicifolium</i> E.Mey. ex Hook., <i>Dodonaea dubia</i> Eckl. & Zeyh.  | Bush willow bushveld willow (E), isidubu (X)                                                                                 | Combretaceae  | Tree      | Roots                 | Ground root is boiled and filtered and 1 cup of the mixture is mixed with water to bathe (twice daily) to relieve body and leg pains                                                | Bhat and Jacobs (1995)                                             | 1  |
| <i>Combretum collinum</i> Fresen.                                                                                                              | Weeping Bushwillow, Bicoloured Bushwillow (E), Vaiërende Boswilg (A), Muvuvha (V), Fufu (Xitsonga)                           | Combretaceae  | Tree      | Roots                 | Root infusion is used for painful legs, cramps and joint pains                                                                                                                      | Tshikalange et al. (2016)                                          | 1  |
| <i>Combretum kraussii</i> Hochst.<br>Synonyms: <i>Combretum nelsonii</i>                                                                       | umDubu wehlathi, umDubu (X)                                                                                                  | Combretaceae  | Tree      | Roots                 | Ground root is boiled and filtered and 1 cup of the mixture is mixed with water                                                                                                     | Bhat and Jacobs (1995); Mbanjwa (2020)                             | 2  |

| Botanical name                                                                                                                      | *Common name                                                                                                     | Family         | Life-form | #Part used | Application                                                                                                  | Reference                                             | Nm |
|-------------------------------------------------------------------------------------------------------------------------------------|------------------------------------------------------------------------------------------------------------------|----------------|-----------|------------|--------------------------------------------------------------------------------------------------------------|-------------------------------------------------------|----|
| Dummer, <i>Combretum woodii</i><br>Dummer                                                                                           |                                                                                                                  |                |           |            | to bathe (twice daily) to relieve body and leg pains. Rememdy for back pain                                  |                                                       |    |
| <i>Combretum molle</i> R.Br. ex G.Don. Synonyms: <i>Combretum gueinzii</i> Sond, <i>Combretum velutinum</i> DC.                     | Velvet bush willow, velvet leaf willow (E), mokgwethe (NS), Isibondwe, Umbonda, Umbondwe (Z)                     | Combretaceae   | Tree      | ns         | Analgesic (general body pains, internal sharp body pains, lower back pain)                                   | Mhlongo and Van Wyk (2019)                            | 1  |
| <i>Combretum paniculatum</i> Vent. Synonyms: <i>Combretum abbreviatum</i> Engl., <i>Combretum ramosissimum</i> Engl. & Diels        | Burning bush, forest flame-creeper (E), Mukopo-kopo, Gopo-Gopo (V)                                               | Combretaceae   | Shrub     | Roots      | Root decoction is used to prepare soft porridge twice daily and taken to relieve headache die to indigestion | Arnold and Gulumian (1984)                            | 1  |
| <i>Commelina africana</i> L. Synonyms: <i>Commelina edulis</i> A.Rich, <i>Dirtea africana</i> (L.) Raf.                             | Common yellow commelina (E), Geeleendagsblom (A), Idangabane, Idangabane lomfula (Z)                             | Commelinaceae  | Herb      | ns         | Musculo-skeletal (inflammation). Used for menstruation pains                                                 | Mhlongo and Van Wyk (2019); Hulley and Van Wyk (2019) | 2  |
| <i>Commelina benghalensis</i> L. Synonyms: <i>Commelina canescens</i> Vahl, <i>Commelina turbinata</i> Vahl                         | Benghal dayflower, tropical spiderwort, Benghal wandering Jew (E), blouselblommetjie (A), Idangabane lentaba (Z) | Commelinaceae  | Herb      | ns         | Musculo-skeletal (inflammation)                                                                              | Mhlongo and Van Wyk (2019)                            | 1  |
| <i>Commelina eckloniana</i> Kunth. Synonyms: <i>Commelina weimarckiana</i> Norl, <i>Polyspatha eckloniana</i> Hassk. ex C.B.Clarke. | Idangabane, Idangabane lamanzi (Z)                                                                               | Commelinaceae  | Herb      | ns         | Musculo-skeletal (inflammation)                                                                              | Mhlongo and Van Wyk (2019)                            | 1  |
| <i>Commelina erecta</i> L. Synonyms: <i>Commelina aethiopica</i> C.B.Clarke, <i>Commelina elegans</i> Kunth                         | White mouth dayflower, slender dayflower, or widow's tears (E), Idangabane (Z)                                   | Commelinaceae  | Herb      | ns         | Musculo-skeletal (inflammation)                                                                              | Mhlongo and Van Wyk (2019)                            | 1  |
| <i>Convolvulus sagittatus</i> Thunb.                                                                                                | Wild Bindweed (E), bobbejaantou (A), Uboqo (X), Uvimbukhalo (Z)                                                  | Convolvulaceae | Herb      | Roots      | Headache                                                                                                     | Maroyi (2017)                                         | 1  |

| <b>Botanical name</b>                                                                                                                                                    | <b>*Common name</b>                                                                                           | <b>Family</b>  | <b>Life-form</b> | <b>#Part used</b> | <b>Application</b>                                                                                                                                                                                                                                          | <b>Reference</b>                                                                                                                                   | <b>Nm</b> |
|--------------------------------------------------------------------------------------------------------------------------------------------------------------------------|---------------------------------------------------------------------------------------------------------------|----------------|------------------|-------------------|-------------------------------------------------------------------------------------------------------------------------------------------------------------------------------------------------------------------------------------------------------------|----------------------------------------------------------------------------------------------------------------------------------------------------|-----------|
| <i>Conyza scabrida</i> DC.<br>Synonyms: <i>Nidorella ivifolia</i> (L.) J.C.Manning & Goldblatt, <i>Erigeron dentatus</i> Burm.f., <i>Fimbrillaria baccharoides</i> Cass. | Oven Bush (E), Bakbos, oondbos, paddabos (A), Vleiwilger (KS)                                                 | Asteraceae     | Shrub            | Leaves            | Leaf decoction used for backache. Infusion with ballerja used for headache. Leaf infusions used for cramps after labour and pain as well as rheumatism. Used as a compress to relieve, arthritis, pain and inflammation, headache, backache and stomachache | Nortje and van Wyk (2015); Van Wyk et al. (2008); De Beer and Van Wyk (2011); Hulley and Van Wyk (2019); Philander (2011); Thring and Weitz (2006) | 6         |
| <i>Cotyledon orbiculata</i> L.<br>Synonyms: <i>Cotyledon ambigua</i> Salisb., <i>Cotyledon tricuspidata</i> Haw.                                                         | Pig's ears, cotyledon (E), plakkie, platjies, varkoorblare, varkoor, kouterie (A), impbewula (X), ipewula (Z) | Crassulaceae   | Herb             | Leaves            | Leaves are boiled, filtered and a drop of decoction is used for ear-ache. Leaves is heated and placed on a swollen body part to treat inflammation. Leaf juice treats earache, toothache. Used for ear-ache                                                 | Bhat and Jacobs (1995); Hulley and Van Wyk (2019); Philander (2011)                                                                                | 3         |
| <i>Crassula muscosa</i> L. Synonyms: <i>Combesia muscosa</i> (L.) P.V.Heath, <i>Crassula imbricata</i> Burm.f.                                                           | skilpadbos; klein koorsbos (A)                                                                                | Crassulaceae   | Herb             | Leaves, stem      | Leafy stem use to treat back ache                                                                                                                                                                                                                           | De Beer and Van Wyk (2011)                                                                                                                         | 1         |
| <i>Crinum bulbispermum</i> (Burm.f.) Milne-Redh. & Schweick.<br>Synonyms: <i>Crinum capense</i> Herb, <i>Amaryllis riparia</i> Burch. ex Kunth                           | Orange River lily, Vaal River lily, wild amaryllis (E), Oranjerivierlelie (A); umnduze (Z)                    | Amaryllidaceae | Herb             | Bulbs             | Roasted bulbs are applied to aching joints, rheumatism, varicose veins and backache                                                                                                                                                                         | Watt and Breyer-Brandwijk (1962)                                                                                                                   | 1         |
| <i>Crinum macowanii</i> Baker.<br>Synonyms: <i>Crinum corradii</i> Chiov. ex Chiarugi, <i>Crinum pedicellatum</i> Pax                                                    | Boslelie (A), Cape Coast Lily, Common Vlei Crinum (E), Intelezi (X), Intelezi, Uguqu, Umduze (Z)              | Amaryllidaceae | Herb             | Bulbs             | Decoctions of the bulb taken orally for rheumatic fever. Analgesic (toothache), musculo-skeletal inflammation. Used for headache                                                                                                                            | Hutchings et al. (1996); Van Wyk and Gericke (2000); Mhlongo and Van Wyk (2019); Mbanjwa (2020)                                                    | 4         |

| <b>Botanical name</b>                                                                                                                      | <b>*Common name</b>                                                                                              | <b>Family</b> | <b>Life-form</b> | <b>#Part used</b> | <b>Application</b>                                                                                                                                                                                                 | <b>Reference</b>                                                                      | <b>Nm</b> |
|--------------------------------------------------------------------------------------------------------------------------------------------|------------------------------------------------------------------------------------------------------------------|---------------|------------------|-------------------|--------------------------------------------------------------------------------------------------------------------------------------------------------------------------------------------------------------------|---------------------------------------------------------------------------------------|-----------|
| <i>Croton gratissimus</i> Burch.<br>Synonyms: <i>Croton gratissimus</i> ,<br><i>Croton antunesii</i> Pax                                   | Bergboegoe (A), lavender<br>croton, fever-berry (E),<br>Mufhorola (V) Uhubeshane<br>(Z)                          | Euphorbiaceae | Shrub            | Bark,<br>leaves   | Finely ground dry bark is<br>rubbed as an irritant into<br>incisions on the skin for<br>inflammation and pain in the<br>chest. Leaves as ingredients<br>in mixtures used for<br>'smoking' by rheumatic<br>patients | Watt and Breyer-<br>Brandwijk<br>(1962); Hutchings<br>et al. (1996)                   | 2         |
| <i>Croton steenkampianus</i> Gerstner                                                                                                      | Marsh Fever-berry (E),<br>vleikoorsbessie (A),<br>uhubeshane omkhulu (Z)                                         | Euphorbiaceae | Shrub            | Leaves            | Steam from fresh leaf<br>decoctions is inhaled to<br>relieve aches. A remedy<br>against painful joints, back<br>and rheumatism                                                                                     | Pooley (1993);<br>Watt and Breyer-<br>Brandwijk<br>(1962); Hutchings<br>et al. (1996) | 3         |
| <i>Croton sylvaticus</i> Hochst.<br>Synonyms: <i>Croton bukobensis</i><br>Pax, <i>Croton verdickii</i> De Wild.                            | Boskoorsbessie (A), forest<br>croton, forest fever-berry<br>(E), uminya, ummbila,<br>Umgweba, Umzilanyoni<br>(Z) | Euphorbiaceae | Shrub            | Bark              | Bark is used for abdominal<br>disorders, internal<br>inflammations. Analgesic<br>(toothache, sharp internal<br>body pains)                                                                                         | Bryant (1966);<br>Mhlongo and Van<br>Wyk (2019)                                       | 2         |
| <i>Cryptocarya latifolia</i> Sond.                                                                                                         | Broad-leafed quince,<br>Nitonga nut (E),<br>Basterswartysterhout (A),<br>umkhondweni,<br>undlangwenya (Z)        | Lauraceae     | Tree             | Bark              | Bark is also used to treat<br>internal pains, muscular and<br>cramps                                                                                                                                               | Pujol (1990)                                                                          | 1         |
| <i>Cryptocarya myrtifolia</i> Stapf.<br>Synonyms: <i>Cryptocarya<br/>vacciniifolia</i> Stapf, <i>Cryptocarya<br/>vaccinioides</i> Kosterm. | Camphor tree (E),<br>kanferboom (A), igqeba,<br>umkhondweni, umngqabe<br>(Z)                                     | Lauraceae     | Tree             | Bark              | Snuff or smoke from the bark<br>is inhaled to treat headaches.                                                                                                                                                     | Hutchings et al.<br>(1996); Watt and<br>Breyer-Brandwijk<br>(1962)                    | 2         |
| <i>Cucumis africanus</i> L.f.<br>Synonyms: <i>Cucumis hookeri</i><br>Naud, <i>Cucumis arenarius</i><br>Schrad.                             | Agurkie, bitterappel (A),<br>thorn cucumber, wild<br>cucumber (E), isende-lenja,<br>uselwa-lwemamba (Z)          | Cucurbitaceae | Herb             | Fruit,<br>leaves  | Warm water infusions of<br>fruit pulp are administered as<br>enemas for the relief of<br>lumbago                                                                                                                   | Watt and Breyer-<br>Brandwijk (1962)                                                  | 1         |
| <i>Cussonia nicholsonii</i> Strey                                                                                                          | South Coast Cabbage-tree<br>(E), Insengane, Umsenge<br>(Z)                                                       | Araliaceae    | Tree             | ns                | Musculo-skeletal<br>inflammation                                                                                                                                                                                   | Mhlongo and Van<br>Wyk (2019)                                                         | 1         |

| <b>Botanical name</b>                                                                                                                                                         | <b>*Common name</b>                                                                                                                                        | <b>Family</b>  | <b>Life-form</b> | <b>#Part used</b> | <b>Application</b>                                                | <b>Reference</b>                           | <b>Nm</b> |
|-------------------------------------------------------------------------------------------------------------------------------------------------------------------------------|------------------------------------------------------------------------------------------------------------------------------------------------------------|----------------|------------------|-------------------|-------------------------------------------------------------------|--------------------------------------------|-----------|
| <i>Cussonia spicata</i> Thunb.<br>Synonyms: <i>Cussonia boivinii</i> Drake, <i>Cussonia triptera</i> Colla                                                                    | Cabbage-tree, common cabbage tree (E), kiepersol (A), Umsenge (Z)                                                                                          | Araliaceae     | Tree             | ns                | Musculo-skeletal inflammation. Used for headache                  | Mhlongo and Van Wyk (2019); Mbanjwa (2020) | 2         |
| <i>Cyanotis speciosa</i> (L.f.) Hassk.<br>Synonyms: <i>Tradescantia nodiflora</i> Lam, <i>Tonningia nodiflora</i> (Lam.) Kuntze                                               | Doll's Powderpuff, Job's Tears (E), loupoeierkwassie (A), Theepe-balingoana (SS), Iphindemuva, (Udabulamafu), Unkungwini (Z)                               | Commelinaceae  | Herb             | ns                | Musculo-skeletal (inflammation)                                   | Mhlongo and Van Wyk (2019)                 | 1         |
| <i>Cycnium racemosum</i> Benth.<br>Synonyms: <i>Cycnium huttoniae</i> , <i>Cycnium kraussianum</i>                                                                            | Large mountain ink flower (E), berginkplant (A), Injanga (X), Uhlabahlangane (Z)                                                                           | Orobanchaceae  | Herb             | Roots             | Root infusions are taken as emetics for general pains in the body | Watt and Breyer-Brandwijk (1962)           | 1         |
| <i>Cymbopogon marginatus</i> (Steud.) Stapf ex Burtt-Davy.<br>Synonyms: <i>Andropogon marginatus</i> Steud., <i>Andropogon nardus</i> subsp. <i>marginatus</i> (Steud.) Hack. | Lemon Grass, Lemon-scented Grass, Dobo Grass, Khuskhus (E), Koperdraad, Koperdraadgras, Kuskusgras (A), Lebata (SS), Fungwi (V), Umqungu (X), Isiqunga (Z) | Poaceae        | Grass            | Roots             | Roots are burned and smoke inhaled to relieve headache            | Arnold and Gulumian (1984)                 | 1         |
| <i>Cyperus papyrus</i> L. Synonyms: <i>Chlorocyperus papyrus</i> (L.) Rikli, <i>Papyrus antiquorum</i> Willd.                                                                 | Papyrus (E), Papirus (A), Ibhuma, Intandelo (Z)                                                                                                            | Cyperaceae     | Herb             | ns                | Musculo-skeletal (inflammation)                                   | Mhlongo and Van Wyk (2019)                 | 1         |
| <i>Cyphostemma cirrhosum</i> (Thunb.) Desc. ex Wild & R.B.<br>Synonyms: <i>Cissus cirrhosa</i> (Thunb.) Willd, <i>Vitis cirrhosa</i> Thunb.                                   | Wildedruif, Wildedruive (A), Isidikili (Z)                                                                                                                 | Vitaceae       | Creeper          | ns                | Musculo-skeletal (inflammation)                                   | Mhlongo and Van Wyk (2019)                 | 1         |
| <i>Cyrtanthus obliquus</i> (L.f.) Aiton. Synonyms: <i>Amaryllis pendula</i> Salisb., <i>Timmia obliqua</i> (L.f.) J.F.Gmel.                                                   | Knysna lily (E), Knysnalelie (A), Umathunga (X), Umathaga (Z)                                                                                              | Amaryllidaceae | Herb             | Roots             | Root infusion is taken for stomachache                            | Bhat and Jacobs (1995)                     | 1         |



| <b>Botanical name</b>                                                                                                                         | <b>*Common name</b>                                                                                                                     | <b>Family</b> | <b>Life-form</b> | <b>#Part used</b> | <b>Application</b>                                                                                                                                                                                                                                                    | <b>Reference</b>                                                                                              | <b>Nm</b> |
|-----------------------------------------------------------------------------------------------------------------------------------------------|-----------------------------------------------------------------------------------------------------------------------------------------|---------------|------------------|-------------------|-----------------------------------------------------------------------------------------------------------------------------------------------------------------------------------------------------------------------------------------------------------------------|---------------------------------------------------------------------------------------------------------------|-----------|
| <i>Dais cotinifolia</i> L. Synonyms: <i>Dais canescens</i> Bartl. ex Meisn., <i>Lasiosiphon grandifolius</i> Gilli                            | Pompon tree, pincushion tree (E), kannabas, speldekussing, basboom (A), intozani, isihlungu (X), intozwane-emnyama (Z)                  | Thymelaeaceae | Tree             | Leaves            | Leaf decoction (half a cup) is used for treating stomachache                                                                                                                                                                                                          | Bhat and Jacobs (1995)                                                                                        | 1         |
| <i>Dasispermum suffruticosum</i> (P.J.Bergius) B.L.Burt. Synonyms: <i>Capnophyllum jacquinii</i> DC., <i>Conium suffruticosum</i> P.J.Bergius | Wild parsley, Sea Parsley, Duineseldery (E)                                                                                             | Apiaceae      | Herb             | Leaves            | Leaves are used for rheumatism                                                                                                                                                                                                                                        | Philander (2011)                                                                                              | 1         |
| <i>Dalbergia armata</i> E.Mey.                                                                                                                | Thorny-rope, flat-bean, Hluhluwe climber (E), doringtou (A), sehlokootswa (NS), uBobo (X), Umhluhluwe, Umhluhluwe (Z)                   | Fabaceae      | Shrub            | Roots, leaves, ns | Analgesic (sharp internal body pains). The roots are boiled in water and the water is gargled to relieve toothache. Leaf decoction is taken (half a cup thrice daily) for body pains                                                                                  | Mhlongo and Van Wyk (2019); Corrigan et al. (2011); Bhat and Jacobs (1995)                                    | 3         |
| <i>Dalbergia obovata</i> E.Mey. Synonym: <i>Dalbergia sessiliflora</i> Harms                                                                  | climbing flat bean (E), bobbejaankoudoring, rankplatboontjie (A), Umzungulu (Z)                                                         | Fabaceae      | Climber          | ns                | For treating ear-ache and muscular cramps                                                                                                                                                                                                                             | Mhlongo and Van Wyk (2019); Mbanjwa (2020)                                                                    | 2         |
| <i>Datura stramonium</i> L. Synonyms: <i>Datura bernhardii</i> , <i>Datura inermis</i>                                                        | Downy thorn apple, ditch weed, Jimson weed, stinkwort (E), gewone stinkblaar, malpitte (A), Stinkblaar (KS), umhlavuthwa (X), iloqi (Z) | Solanaceae    | Herb             | Leaves            | Leaves are smoked for the relief of headaches. Leaf infusions are used for treating rheumatism. Powdered leaves are applied to human and animal bruises to alleviate inflammation. Leaves applied as compress on pain (inflammation), backache, headache and ear-ache | Van Wyk et al. (1997); Watt and Breyer-Brandwijk (1962); Nortje and van Wyk (2015); Hulley and Van Wyk (2019) | 4         |

| <b>Botanical name</b>                                                                                                                                                     | <b>*Common name</b>                                                                                 | <b>Family</b>   | <b>Life-form</b> | <b>#Part used</b> | <b>Application</b>                                                                                                                                                                                                                                                                   | <b>Reference</b>                                                                                     | <b>Nm</b> |
|---------------------------------------------------------------------------------------------------------------------------------------------------------------------------|-----------------------------------------------------------------------------------------------------|-----------------|------------------|-------------------|--------------------------------------------------------------------------------------------------------------------------------------------------------------------------------------------------------------------------------------------------------------------------------------|------------------------------------------------------------------------------------------------------|-----------|
| <i>Desmodium incanum</i> DC.<br>Synonyms: <i>Desmodium sparsiflorum</i> G. Don, <i>Meibomia racemifera</i> (DC.) Kuntze                                                   | Creeping beggerweed (E), isinama, Umboniselwa, Inamathela (Z)                                       | Fabaceae        | Shrub            | ns                | For treating back pain                                                                                                                                                                                                                                                               | Mbanjwa (2020)                                                                                       | 1         |
| <i>Dianthus thunbergii</i> S.S.Hooper.<br>Synonym: <i>Dianthus scaber</i> Thunb.                                                                                          | Wild Pink (E), aandblommetjie, Grashout, Wilde-angelier (A)                                         | Caryophyllaceae | Herb             | ns                | Used to treat stomachache                                                                                                                                                                                                                                                            | Hulley and Van Wyk (2019)                                                                            | 1         |
| <i>Dicerocaryum eriocarpum</i> (Decne.) Abels                                                                                                                             | Devil's thorn (E), beesdubbeltjie, seepbos (A), makanagwe (TW)                                      | Pedaliaceae     | Herb             | Whole plant       | Whole plant is burnt for treating headache                                                                                                                                                                                                                                           | Tshikalange et al. (2016)                                                                            | 1         |
| <i>Dicerotheramnus rhinocerotis</i> (L.f.) Koek. Synonyms: <i>Elytropappus rhinocerotis</i> (L.f.) Less., <i>Stoebe rhinocerotis</i> L.f., <i>Seriphium adpressum</i> DC. | Rhinoceros bush, rhenoster bush (E), renosterbos, rhenosterbos (A) Renosterbos (KS)                 | Asteraceae      | Shrub            | Leaves, stem      | Leaf decoction used for painful legs and as wash for burning feet, as compress for backache. Used as wash for rheumatism. Infusion of young stem is used for back pain. Leaves are chewed and juices swallowed for stomachache. Infusions used for stomachache, headache and earache | Nortje and van Wyk (2015); Van Wyk et al. (2008); Hulley and Van Wyk (2019); Thring and Weitz (2006) | 4         |
| <i>Dichrostachys cinerea</i> (L.) Wight & Arn. Synonyms: <i>Acacia engleri</i> ; <i>Acacia spinosa</i> , <i>Cailliea dichrostachys</i>                                    | Sickle bush (E), Sekelbos (A), ugagane, ugegane, umthezane, Udonsuthando, umzilazembe, usegwane (Z) | Fabaceae        | Shrub            | Roots             | Roots are an ingredient in a decoction taken to ease pain or rubbed into incisions cut over the painful area. Analgesic (sharp internal body pains), side pains in babies                                                                                                            | Palmer and Pitman (1961); Mhlongo and Van Wyk (2019)                                                 | 2         |
| <i>Dicoma capensis</i> Less.<br>Synonyms: <i>Berkheya albida</i> DC., <i>Tibestina lanuginosa</i> Maire                                                                   | Fever bush (E), Karmedik, verpis, vyfpondbos, Melktou (A), koorsbos(sie) (KS)                       | Asteraceae      | Herb             | Leaves            | Leaf infusion with other plants used for rheumatism and backache. For treating rheumatism and stomach pain                                                                                                                                                                           | Nortje and van Wyk (2015); Van Wyk et al. (2008); De Beer and Van Wyk (2011)                         | 3         |

| <b>Botanical name</b>                                                                                                                             | <b>*Common name</b>                                                                                                                | <b>Family</b> | <b>Life-form</b> | <b>#Part used</b> | <b>Application</b>                                                                                                                                                                                                          | <b>Reference</b>                       | <b>Nm</b> |
|---------------------------------------------------------------------------------------------------------------------------------------------------|------------------------------------------------------------------------------------------------------------------------------------|---------------|------------------|-------------------|-----------------------------------------------------------------------------------------------------------------------------------------------------------------------------------------------------------------------------|----------------------------------------|-----------|
| <i>Dioscorea dregeana</i> (Kunth) T. Durand & Schinz Synonyms: <i>Helmia dregeana</i> Kunth, <i>Dioscorea dregeana</i> var. <i>dregeana</i>       | Wild yam (E), wildejam (A), Ingevu, Intana ebovu, Udakwa, Ufudu, Ufudulwehlathi (Z)                                                | Dioscoreaceae | Creeper          | ns                | Analgesic (sharp internal body pains)                                                                                                                                                                                       | Mhlongo and Van Wyk (2019)             | 1         |
| <i>Diosma oppositifolia</i> L. Synonyms: <i>Diosma decussata</i> Lam., <i>Diosma succulenta</i> P.J.Bergius                                       | Bitter buchu (E), bitterboegoe (A)                                                                                                 | Rutaceae      | Shrub            | Leaves            | Leaves used external for sprains                                                                                                                                                                                            | Philander (2011)                       | 1         |
| <i>Diosma prama</i> I.Williams                                                                                                                    | Little Karoo buchu (E)                                                                                                             | Rutaceae      | Shrub            | ns                | Used to treat backache                                                                                                                                                                                                      | Hulley and Van Wyk (2019)              | 1         |
| <i>Diospyros austro-africana</i> De Winter                                                                                                        | Fire-sticks, star-apple (E), jakkalsbos, vuurmaakbossie, kraaibessie (A), liperekisi-tsa-makhoaba, senokonoko (SS), umbhongisa (X) | Ebenaceae     | Shrub            | Roots             | Dried roots are smoked to relieve headache                                                                                                                                                                                  | Van Wyk et al. (2008)                  | 1         |
| <i>Diospyros mespiliformis</i> Hochst. ex A.DC. Synonyms: <i>Diospyros bicolor</i> Klotzsch, <i>Diospyros senegalensis</i> Perrier ex A.DC.       | African ebony, jackal-berry (E), jakkalsbessie (A), Musuma (V)                                                                     | Ebenaceae     | Tree             | Seeds             | Seed decoction is drunk or used to prepare soft porridge for headache                                                                                                                                                       | Arnold and Gulumian (1984)             | 1         |
| <i>Diospyros villosa</i> (L.) De Winter var. <i>villosa</i> . Synonyms: <i>Royena corilyfolia</i> , <i>Royena scabra</i> , <i>Royena scandens</i> | Hairy star-apple (E), harige sterappel, bloubos (A), umbishimbishi, umbongisa, Umqandane wesempisi, Indodemnyama (Z)               | Ebenaceae     | Shrub            | Leaves, roots     | Leaves or pounded roots are bruised and placed over painful spots for up to an hour as a counter irritant to any kind of fixed internal pain. Pulverised roasted rootbark is rubbed into incisions on fractures and sprains | Bryant (1966); Hutchings et al. (1996) | 2         |
| <i>Dittrichia graveolens</i> (L.) Greuter. Synonyms: <i>Conyza minor</i> Bubani, <i>Jacobaea graveolens</i> (L.) Merino                           | Stinkwort, stinking fleabane (E), kakiebos (A)                                                                                     | Asteraceae    | Shrub            | ns                | Used as a wash for pain and inflammation                                                                                                                                                                                    | Hulley and Van Wyk (2019)              | 1         |

| <b>Botanical name</b>                                                                                                                                       | <b>*Common name</b>                                                                                     | <b>Family</b> | <b>Life-form</b> | <b>#Part used</b> | <b>Application</b>                                                                                                                                                                                                                                                                                                                                                                            | <b>Reference</b>                                                                                                                                                                                        | <b>Nm</b> |
|-------------------------------------------------------------------------------------------------------------------------------------------------------------|---------------------------------------------------------------------------------------------------------|---------------|------------------|-------------------|-----------------------------------------------------------------------------------------------------------------------------------------------------------------------------------------------------------------------------------------------------------------------------------------------------------------------------------------------------------------------------------------------|---------------------------------------------------------------------------------------------------------------------------------------------------------------------------------------------------------|-----------|
| <i>Dodonaea viscosa</i> Jacq var. <i>angustifolia</i> (L.f) Benth.<br>Synonyms: <i>Dodonaea arabica</i> Hochst. & Steud., <i>Dodonaea angustifolia</i> L.f. | Sand olive (E), makkaree, Sandolien, ysterhouttoppe (A), mutata-vhana (V)                               | Sapindaceae   | Shrub            | Leaves            | Leaf decoctions are used against arthritis. Infusion of leafy tips are used for back pain. Powdered leaves used as snuff to help with headache. Leaf infusions used for pain and inflammation, backache and arthritis. The leaf tops ( $\pm 3$ teaspoons in 1 L boiling water) are made into an infusion and small amount taken 3 times daily to treat arthritis, inflammation and rheumatism | Van Wyk et al. (1997); Watt and Breyer-Brandwijk (1962); Van Wyk et al. (2008); De Beer and Van Wyk (2011); Hulley and Van Wyk (2019); Philander (2011); Thring and Weitz (2006); Mintsu Mi Nzue (2009) | 8         |
| <i>Dolichotheix ericoides</i> (Lam.) Hilliard & B.L.Burt.<br>Synonyms: <i>Aphelaxis ericoides</i> Sweet, <i>Xeranthemum ericoides</i> Lam.                  | klipanoster, berganoster, langbeenanosterbos (A)                                                        | Asteraceae    | Herb             | ns                | Infusions used for treating backache and pain                                                                                                                                                                                                                                                                                                                                                 | Hulley and Van Wyk (2019)                                                                                                                                                                               | 1         |
| <i>Dovyalis caffra</i> (Hook.f. & Harv.) Sim. Synonyms: <i>Aberia caffra</i> , <i>Dovyalis caffra</i> (Hook. f. & Harv.) Warb.                              | Kei-apple, Dingaans apricot, wild apricot (E), Kei-appel, appelkoosdoring (A), mutunu (V), Umqokolo (Z) | Salicaceae    | Shrub            | Root, bark, thorn | Roots and thorns are used for treating chest pain. Decoction of the bark and root is a remedy for rheumatism. Analgesic (sharp internal body pains). Thorn decoction is drunk for pain in chest (heart side)                                                                                                                                                                                  | Bryant (1966); Cumes et al. (2009); Watt and Breyer-Brandwijk (1962); Mhlongo and Van Wyk (2019); Arnold and Gulumian (1984)                                                                            | 5         |
| <i>Dovyalis rhamnoides</i> (Burch. ex DC.) Burch. ex Harv. & Sond.<br>Synonyms: <i>Flacourtia rhamnoides</i> Burch. ex DC.,                                 | Cape cranberry, crownberry, sourberry, wineberry (E), suurbessie, wynbessie (A), isihlamane,            | Salicaceae    | Shrub            | Roots, bark       | Root and bark decoctions are taken for the pain in rheumatic fever and rheumatism                                                                                                                                                                                                                                                                                                             | Bryant (1966)                                                                                                                                                                                           | 1         |

| Botanical name                                                                                                                                                | *Common name                                                                                                                           | Family        | Life-form | #Part used          | Application                                                                                                                                  | Reference                                                            | Nm |
|---------------------------------------------------------------------------------------------------------------------------------------------------------------|----------------------------------------------------------------------------------------------------------------------------------------|---------------|-----------|---------------------|----------------------------------------------------------------------------------------------------------------------------------------------|----------------------------------------------------------------------|----|
| <i>Dovyalis zizyphoides</i> E.Mey. ex Arn.                                                                                                                    | ukhanginqi, umkokolo, umnyezane (Z)                                                                                                    |               |           |                     |                                                                                                                                              |                                                                      |    |
| <i>Dracaena alettriformis</i> (Haw.) Bos. Synonyms: <i>Dracaena hookeriana</i> , <i>Dracaena latifolia</i> Regel, <i>Pleomele hookeriana</i> (Kuntze) N.E.Br. | Large-leaved dragon tree (E), Isikhothakhotha, Iskhothakhotha esikhulu, isikhothakhotha esincane, Ufayibe (Z)                          | Asparagaceae  | Tree      | ns                  | Analgesic (toothache), musculo-skeletal (inflammation)                                                                                       | Mhlongo and Van Wyk (2019)                                           | 1  |
| <i>Drimia altissima</i> (L.f.) Ker Gawl. Synonyms: <i>Urginea altissima</i> , <i>Drimia paolii</i> Chiov.                                                     | Tall white squill (E), Jeukbol (A), maerman, isiklenama, umahlogolosi, umgulube (Z)                                                    | Asparagaceae  | Herb      | Bulbs               | Bulbs are used as poultices for rheumatic swellings and gouty limbs                                                                          | Watt and Breyer-Brandwijk (1962)                                     | 1  |
| <i>Drimia elata</i> Jacq. Synonyms: <i>Drimia alta</i> R.A.Dyer, <i>Drimia robusta</i> Baker                                                                  | Satin Squill (E), brandui, maerman (A), indongana-zibomvana, isiklenama (Z)                                                            | Asparagaceae  | Herb      | Bulbs               | Bulb scales are rubbed on the chest for stabbing pains. Poultice of the bulb is used against pain and inflammation. Topical arthritis remedy | Hutchings et al. (1996); Hulley and Van Wyk (2019); Philander (2011) | 3  |
| <i>Drimiopsis maculata</i> Lindl. & Paxton. Synonyms: <i>Ledebouria petiolata</i> J.C.Manning & Goldblatt, <i>Drimiopsis minor</i> Baker                      | Leopard lily, little white soldiers, small snake lily (E), Ikhambi lezingane, Imbiza yezingane, Umayihlandlana, Umbola, U-anyanisi (Z) | Asparagaceae  | Herb      | ns                  | Musculo-skeletal (inflammation)                                                                                                              | Mhlongo and Van Wyk (2019)                                           | 1  |
| <i>Dysphania ambrosioides</i> (L.) Mosyakin & Clemants. Synonyms: <i>Ambrina ambrosioides</i> (L.) Spach, <i>Atriplex ambrosioides</i> f. <i>minus</i> Aellen | Mexican tea (E), Ikhambi leslumo (Z)                                                                                                   | Amaranthaceae | Herb      | Leaves, ns          | Analgesic (fever). Leaves used as bud for earache and toothache. Leaves used as a compress for pain and inflammation                         | Mhlongo and Van Wyk (2019); Hulley and Van Wyk (2019)                | 2  |
| <i>Ekebergia capensis</i> Sparrm. Synonyms: <i>Ekebergia buchananii</i> Harms, <i>Trichilia ekebergia</i> E. Mey. ex Sond.                                    | Cape ash, dog plum (E), essenhout, rooiess(en)hout (A), nyamaru (TW), mmidibidi (NS), Mutovuma (V), umnyamathi,                        | Meliaceae     | Tree      | Roots, bark, leaves | Roots are used for headaches. Leaves and bark are used for headache. Bark is macerated and used as                                           | Watt and Breyer-Brandwijk (1962); Mabogo (1990); Arnold              | 3  |

| Botanical name                                                                                                                          | *Common name                                                                                                                                                            | Family       | Life-form | #Part used | Application                                                              | Reference                  | Nm |
|-----------------------------------------------------------------------------------------------------------------------------------------|-------------------------------------------------------------------------------------------------------------------------------------------------------------------------|--------------|-----------|------------|--------------------------------------------------------------------------|----------------------------|----|
|                                                                                                                                         | umthoma, usimanaye, uvungu (Z)                                                                                                                                          |              |           |            | enema to relieve backache for 2 days                                     | and Gulumian (1984)        |    |
| <i>Elephantorrhiza burkei</i> Benth.                                                                                                    | Elephant-root, sumach bean (E), basboontjie, basbos (A), lesitsane (NS), mositsane, mosidi, mosidi-godimo, mosidi-mogolo (TW), tshisesevhafa, gumulolo, musesevhufo (V) | Fabaceae     | Tree      | Roots      | Root decoction is used for enema on swollen legs due to stomach troubles | Arnold and Gulumian (1984) | 1  |
| <i>Elephantorrhiza praetermissa</i> J.H.Ross                                                                                            | Sekhukhune Elephant-root (E)                                                                                                                                            | Fabaceae     | Shrub     | ns         | Decoction is used to treat stomach pains                                 | Mogale et al. (2019)       | 1  |
| <i>Eleutherine bulbosa</i> (Mill.) O.Urb. Synonyms: <i>Bermudiana bulbosa</i> (Mill.) Molina, <i>Eleutherine plicata</i> Herb. ex Klatt | Ingqunda, Uhloyile (Z)                                                                                                                                                  | Iridaceae    | Herb      | ns         | Analgesic (body pains), musculo-skeletal (inflammation)                  | Mhlongo and Van Wyk (2019) | 1  |
| <i>Emex australis</i> Steinh. Synonyms: <i>Emex centropodium</i> Meisn, <i>Emex podocentrum</i> Meisn. ex Drège                         | Cape Spinach, Cat's Head, Devil's Thorn (E), Dubbeltjie, Dubbeltjiedoring (A), Umanyiwa yinkomo, Unginyathele, Unkuzana (Z)                                             | Polygonaceae | Herb      | ns         | Analgesic (toothache), musculo-skeletal (inflammation)                   | Mhlongo and Van Wyk (2019) | 1  |
| <i>Encephalartos natalensis</i> R.A.Dyer & Verdoorn                                                                                     | Natal cycad (E), natalbroodboom (A), Isiqiki semfene, Isgqiki somkhovu (Z)                                                                                              | Zamiaceae    | Tree      | ns         | Analgesic (sharp internal body pains)                                    | Mhlongo and Van Wyk (2019) | 1  |
| <i>Encephalartos villosus</i> Lem.                                                                                                      | Poor man's cycad (E), Isgqiki somkhovu, Isgqiki semfene, Umasundwana (Z)                                                                                                | Zamiaceae    | Tree      | ns         | Analgesic (sharp internal body pains)                                    | Mhlongo and Van Wyk (2019) | 1  |
| <i>Englerophytum natalense</i> (Sond.) T.D.Penn. Synonyms: <i>Amorphospermum natalense</i>                                              | Natal. silverleaf milkplum (E), Natalmelkpruim (A),                                                                                                                     | Sapotaceae   | Tree      |            | Used for treating toothache                                              | Mbanjwa (2020)             | 1  |

| Botanical name                                                                                                                                                                       | *Common name                                                                                                                   | Family       | Life-form | #Part used   | Application                                                                                                                       | Reference                                                          | Nm |
|--------------------------------------------------------------------------------------------------------------------------------------------------------------------------------------|--------------------------------------------------------------------------------------------------------------------------------|--------------|-----------|--------------|-----------------------------------------------------------------------------------------------------------------------------------|--------------------------------------------------------------------|----|
| (Sond.) Baehni, <i>Neoboivinella natalensis</i> (Sond.) Aubrév. & Pellegr.                                                                                                           | ithunga, umThungwane (X), umThongwane (Z)                                                                                      |              |           |              |                                                                                                                                   |                                                                    |    |
| <i>Eriocephalus africanus</i> L.<br>Synonyms: <i>Eriocephalus corymbosus</i> Moench, <i>Eriocephalus umbellulatus</i> DC.                                                            | Wild rosemary (E), wilderoosmaryn, kapokbos (A.)                                                                               | Asteraceae   | Shrub     | Leaves, stem | Treatment for migraine and headache                                                                                               | Philander (2011); Mintsu Mi Nzue (2009)                            | 2  |
| <i>Eriocephalus ericoides</i> (L.f.) Druce. Synonyms: <i>Eriocephalus glaber</i> var. <i>glaber</i> , <i>Tarchonanthus ericoides</i> L.f.                                            | Rosemary, Kapok Bush (E), Kapokbos, Regtekapok, Renosterveldkapok, wilderoosmaryn, Sandveldkapokbossie (A)                     | Asteraceae   | Shrub     | ns           | Used for backache, pain and inflammation                                                                                          | Hulley and Van Wyk (2019)                                          | 1  |
| <i>Eriocephalus punctulatus</i> DC.<br>Synonyms: <i>Eriocephalus pteronoides</i> Sch.Bip., <i>Eriocephalus punctulatus</i> var. <i>punctulatus</i>                                   | Wild Rosemary, Cape chamomile (E), Boegoekapok (A)                                                                             | Asteraceae   | Shrub     | Leaves       | Treatment for migraine                                                                                                            | Philander (2011)                                                   | 1  |
| <i>Eriospermum lanceifolium</i> Jacq.<br>Synonyms: <i>Eriospermum brevipedicellatum</i> (Kuntze) Poelln., <i>Eriospermum lanceifolium</i> Jacq. var. <i>brevipedicellatum</i> Kuntze | Baboon ear (E), babbejaanore (A)                                                                                               | Asparagaceae | Herb      | Bulbs        | Ingested to alleviate pain                                                                                                        | Philander (2011)                                                   | 1  |
| <i>Erythrina caffra</i> Thunb.                                                                                                                                                       | Coast coral tree (E), kuskoraalboom (A), Umsinsi, Umnsinsi (Z)                                                                 | Fabaceae     | Tree      | Bark, ns     | Analgesic (toothache, earache). The bark is used for treating toothache                                                           | Mhlongo and Van Wyk (2019); Mbanjwa (2020)                         | 2  |
| <i>Erythrina lysistemon</i> Hutch.<br>Synonym: <i>Erythrina caffra</i> var. <i>mossambicensis</i>                                                                                    | Common coral tree, lucky bean tree (E), gewone koraalboom, kanniedood (A), umsinsi (X), muvhale (V), mophete (TW), umsinsi (Z) | Fabaceae     | Tree      | Bark         | Bark is used to treat arthritis and toothache. Bark is used as a poultice for swellings and abscesses. The bark s using toothache | Pujol (1990); Mabogo (1990); Van Wyk et al. (1997); Mbanjwa (2020) | 4  |

| Botanical name                                                                                                                                                             | *Common name                                                                                                                                                                               | Family    | Life-form | #Part used    | Application                                                                                                                                                                                                                      | Reference                                  | Nm |
|----------------------------------------------------------------------------------------------------------------------------------------------------------------------------|--------------------------------------------------------------------------------------------------------------------------------------------------------------------------------------------|-----------|-----------|---------------|----------------------------------------------------------------------------------------------------------------------------------------------------------------------------------------------------------------------------------|--------------------------------------------|----|
| <i>Erythrophleum lasianthum</i> Corbishley. Synonyms: <i>Erythrophleum guineense</i> G. Don var. <i>swaziense</i> Burt Davy; <i>Erythrophleum suaveolens sensu</i> Compton | Maputaland ordeal tree, Swazi ordeal tree, sasswood (E), Maputaland-oordeelboom, Swazi-oordeel boom (A), Umbhemise, Umhlakazane, Umkhwangu (Z)                                             | Fabaceae  | Tree      | Bark          | Powdered bark is widely taken as snuff for headaches and persistent body pain. Decoctions are taken for intestinal spasms in doses limited to one tablespoon                                                                     | Gerstner (1941); Pujol (1990)              | 2  |
| <i>Eucalyptus camaldulensis</i> Dehnh. Synonyms: <i>Eucalyptus acuminata</i> Hook, <i>Eucalyptus mcintyrensis</i> Maiden                                                   | River red gum (E), Ugamthrini, Ugamthrini omhlophe (Z)                                                                                                                                     | Myrtaceae | Tree      | ns            | Analgesic (headache, toothache). Used for relieving menstrual pain                                                                                                                                                               | Mhlongo and Van Wyk (2019); Mbanjwa (2020) | 2  |
| <i>Eucalyptus globulus</i> Labill. Synonyms: <i>Eucalyptus gigantea</i> Dehnh., <i>Eucalyptus perfoliata</i> Desf.                                                         | Eucalyptus                                                                                                                                                                                 | Myrtaceae | Tree      | Leaves        | For treating muscle aches and pain                                                                                                                                                                                               | Philander (2011)                           | 1  |
| <i>Eucalyptus grandis</i> W.Hill                                                                                                                                           | looded gum, rose gum (E), Ugamthrini obomvu, Ugamthrini (Z)                                                                                                                                | Myrtaceae | Tree      | ns            | For relieving menstrual pain                                                                                                                                                                                                     | Mbanjwa (2020)                             | 1  |
| <i>Eucalyptus sideroxylon</i> A.Cunn. Synonyms: <i>Eucalyptus leucoxylon</i> var. <i>minor</i> Benth, <i>Eucalyptus sideroxylon</i> var. <i>rosea</i> Rehder               | Mugga ironbark, red ironbark (E), Bloekom (KS)                                                                                                                                             | Myrtaceae | Tree      | Leaves        | leaf infusion used for backache                                                                                                                                                                                                  | Nortje and van Wyk (2015)                  | 1  |
| <i>Euclea natalensis</i> A.DC. Synonyms: <i>Euclea natalensis</i> subsp. <i>natalensis</i> , <i>Euclea natalensis</i> subsp. <i>obovata</i> F.White                        | Natal guarri, Natal ebony, large-leaved guarri (E), berggwarrie, swartbasboom (A), umTshekisani, umKhasa (X), Mutangulethavha (V), umZimane, umTshikisane, umHlalanyamazane, umAnyathi (Z) | Ebenaceae | Tree      | Roots, bark   | Roots are burned and the smoke inhaled to relieve headache. Roots are powdered and placed on incisions made on forehead to relieve headache. Infusion made from the roots and bark is used to wash the oral cavity for toothache | Arnold and Gulumian (1984)                 | 1  |
| <i>Euclea undulata</i> Thunb. Synonyms: <i>Euclea humilis</i> Eckl.                                                                                                        | small-leaved guarri, common guarri (E),                                                                                                                                                    | Ebenaceae | Tree      | Roots, leaves | Infusions used as treatment for stomachache and                                                                                                                                                                                  | Hulley and Van Wyk (2019)                  | 1  |



| Botanical name                                                                                                                         | *Common name                                                                                                                     | Family        | Life-form | #Part used   | Application                                                                                                                                   | Reference                                                                  | Nm |
|----------------------------------------------------------------------------------------------------------------------------------------|----------------------------------------------------------------------------------------------------------------------------------|---------------|-----------|--------------|-----------------------------------------------------------------------------------------------------------------------------------------------|----------------------------------------------------------------------------|----|
| & Zeyh.. <i>Euclea undulata</i> var. <i>myrtina</i> (Burch.) Hiern                                                                     | kleinblaarghwarrie, gewone ghwarrie (A), gwanxe, inkunzane, umshekizane, umbophanyamazane (Z)                                    |               |           |              | rheumatism. Leaves used as treatment for stomach ailments, chest ailments, infusion                                                           |                                                                            |    |
| <i>Eucomis autumnalis</i> (Mill.) Chitt. Synonyms: <i>Basilaea undulata</i> (Aiton) Mirb, <i>Eucomis undulata</i> Aiton                | Pineapple flower, pineapple lily (E), wildepynappel, krulkoppie (A), Ukhwali, Umathunga, Umathunga obovu (Z)                     | Asparagaceae  | Herb      | ns           | Analgesic (sharp internal body pains, back pains, general body pains)                                                                         | Mhlongo and Van Wyk (2019)                                                 | 1  |
| <i>Eucomis autumnalis</i> (Mill.) Chitt. subsp. <i>autumnalis</i> . Synonym: <i>Eucomis undulata</i> Ait.                              | Pineapple flowers, pineapple lily (E), Wildepynappel, krulkoppie (A), Mothusi, Phato (SS), ubuhlungu becanti (X), umakhondle (Z) | Asparagaceae  | Herb      | Bulbs, roots | Milk or water decoctions of bulb shavings and roots are taken for colic and abdominal distension. Bulbs are used for treating abdominal pains | Hutchings et al. (1996); Watt and Breyer-Brandwijk (1962)                  | 2  |
| <i>Eucomis comosa</i> (Houtt.) Wehrh. var. <i>comosa</i> . Synonyms: <i>Eucomis pallidiflora</i> Bak, <i>Eucomis punctata</i> L'Herit. | Pineapple flower (E), krulkoppie, Pynappellelie (A), Ubuhlungu-becanti (X), Ubuhlungu-becanti (Z)                                | Asparagaceae  | Herb      | Roots, bulbs | Medicine made from the root is administered as an anti-rheumatic in doses of one spoonful. Bulb decoctions are used for rheumatism            | Gerstner (1941); Hutchings et al. (1996); Watt and Breyer-Brandwijk (1962) | 3  |
| <i>Eulophia ovalis</i> Lindl. Synonyms: <i>Eulophia bakeri</i> Rolfe; <i>Eulophia dregeana</i> Lindl.; <i>E. haygarthii</i> Rolfe      | Lekholela, Lekholela-la-Matebele, Lekoasha (SS), Ihamba Lesigodi, Iphamba (Z)                                                    | Orchidaceae   | Herb      | Tuber        | Powder from burnt tubers is rubbed into incisions on sore limbs                                                                               | Hutchings et al. (1996)                                                    | 1  |
| <i>Euphorbia bupleurifolia</i> Jacq. Synonyms: <i>Tithymalus bupleurifolius</i> (Jacq.) Haw, <i>Euphorbia proteifolia</i> Boiss.       | Cycad spurge (E), melkbol (A), insema, intsele (X), inkamamasane, insema (Z)                                                     | Euphorbiaceae | Herb      | Roots        | Ashes from dried burnt roots are rubbed into incisions made around swellings of the lower limbs                                               | Bryant (1966)                                                              | 1  |
| <i>Euphorbia ingens</i> E.Mey. ex Boiss. Synonym: <i>Euphorbia similis</i> A.Berger                                                    | Common tree Euphorbia (E), naboom, gewone naboom (A), Umnhlonhlo, Umphapha (Z)                                                   | Euphorbiaceae | Tree      | Roots, ns    | Roots are burned and the ash rubbed on swollen ankles. Musculo-skeletal (inflammation)                                                        | Mhlongo and Van Wyk (2019); Arnold and Gulumian (1984)                     | 2  |
| <i>Euphorbia mauritanica</i> L. Synonyms: <i>Euphorbia</i>                                                                             | Yellow milk bush, golden spurge (E), geelmelkbos,                                                                                | Euphorbiaceae | Shrub     | Roots        | Infuse the root in boiling water and rinse mouth with                                                                                         | Van Wyk et al. (2008)                                                      | 1  |

| Botanical name                                                                                                                                                    | *Common name                                                                                                                                                                                                                                                                           | Family        | Life-form | #Part used   | Application                                                                                                                        | Reference                     | Nm |
|-------------------------------------------------------------------------------------------------------------------------------------------------------------------|----------------------------------------------------------------------------------------------------------------------------------------------------------------------------------------------------------------------------------------------------------------------------------------|---------------|-----------|--------------|------------------------------------------------------------------------------------------------------------------------------------|-------------------------------|----|
| <i>corallothamnus</i> Dinter,<br><i>Tirucalia mauritanica</i> (L.)<br>P.V.Heath                                                                                   | beesmelkbos, gifmelkbos,<br>kaalmelkbos, kleinmelkbos,<br>melkbos (A)                                                                                                                                                                                                                  |               |           |              | the warm extract to mitigate<br>toothache                                                                                          |                               |    |
| <i>Euphorbia natalensis</i> Bernh. ex<br>Krauss                                                                                                                   | Inkalamasane,<br>Inkamamasane,<br>Umnhlonhlo (Z)                                                                                                                                                                                                                                       | Euphorbiaceae | Shrub     | Root         | For treating toothache                                                                                                             | Mintsa Mi Nzue<br>(2009)      | 1  |
| <i>Euryops lateriflorus</i> (L.f.) DC.<br>Synonyms: <i>Jacobaeastrum</i><br><i>lateriflorum</i> (L.f.) Kuntze,<br><i>Othonna lateriflora</i> L.f.                 | Soetharpuisbos, Vetrepuis,<br>Vetbos, Vetharpuis (A),<br>Blourapuis (KS)                                                                                                                                                                                                               | Asteraceae    | Shrub     | Bark (resin) | The resin is used for<br>toothache                                                                                                 | Nortje and van<br>Wyk (2015)  | 1  |
| <i>Exomis microphylla</i> (Thunb.)<br>Aellen. Synonyms: <i>Atriplex</i><br><i>microphylla</i> Willd., <i>Exomis</i><br><i>microphylla</i> var. <i>microphylla</i> | Basterhondebossie,<br>Brakbos, Brakbossie,<br>Hondebos, Hondebossie,<br>Hondepisbossie,<br>Vaalbrakbossie (A)                                                                                                                                                                          | Amaranthaceae | Shrub     | Leaves       | Used to treat stomach<br>ailments, ear-ache,<br>rheumatism and arthritis.<br>Infusion or compress of<br>leaves used to treat fever | Hulley and Van<br>Wyk (2019)  | 1  |
| <i>Ficus craterostoma</i> Warb. ex<br>Mildbr. & Burret. Synonyms:<br><i>Ficus anomani</i> Hutch., <i>Ficus</i><br><i>ruwenzoriensis</i> De Wild.                  | Forest fig, forest strangler-<br>fig, blunt-leaved forest fig,<br>bastard Natal fig (E),<br>bosvy, wurgvy,<br>stomblaarbosvy,<br>basternatalvy (A), intozane,<br>uluzi, inTendekwane,<br>umthombe (X), umthombe,<br>umbombe, isihlamfane (Z),<br>moumo (NS), muvumo,<br>tshikululu (V) | Moraceae      | Tree      | Leaves       | Fresh leaf decoction is taken<br>orally in small quantities<br>once or twice daily for<br>stomaachache                             | Bhat and Jacobs<br>(1995)     | 1  |
| <i>Ficus ingens</i> (Miq.) Miq.<br>Synonyms: <i>Ficus caffra</i> (Miq.)<br>Miq, <i>Ficus ovatocordata</i> De<br>Wild.                                             | Red-leaved rock fig (E),<br>rooiblaarvy (A), mohlatsa<br>(NS); Umanyala,<br>Umkhiwane (Z)                                                                                                                                                                                              | Moraceae      | Tree      | ns           | Analgesic (sharp internal<br>body pains)                                                                                           | Mhlongo and Van<br>Wyk (2019) | 1  |
| <i>Fockea</i> sp                                                                                                                                                  | kambro; camarebi; camao<br>(A)                                                                                                                                                                                                                                                         | Apocynaceae   | Herb      | Tuber        | Fleshy tuber is use to treat<br>headache                                                                                           | De Beer and Van<br>Wyk (2011) | 1  |

| <b>Botanical name</b>                                                                                                                                                                  | <b>*Common name</b>                                                                   | <b>Family</b> | <b>Life-form</b> | <b>#Part used</b> | <b>Application</b>                                                                                                                                                                                                                       | <b>Reference</b>                                                                                                                          | <b>Nm</b> |
|----------------------------------------------------------------------------------------------------------------------------------------------------------------------------------------|---------------------------------------------------------------------------------------|---------------|------------------|-------------------|------------------------------------------------------------------------------------------------------------------------------------------------------------------------------------------------------------------------------------------|-------------------------------------------------------------------------------------------------------------------------------------------|-----------|
| <i>Foeniculum vulgare</i> Mill.<br>Synonyms: <i>Anethum foeniculum</i> L, <i>Foeniculum officinale</i> ALL.                                                                            | Fennel, vinkel (E),<br>i(li)beka, imbozisa,<br>imboziso(-eluhlaza) (Z)                | Apiaceae      | Herb             | Leaves            | Leaf decoctions are taken three times a day or taken as enemas for pain in the side. Used for cramp and stomach ache. Analgesic (toothache), Musculo-skeletal inflammation. Infusion of the leaves is used for stomachache and arthritis | Hutchings et al. (1996); Watt and Breyer-Brandwijk (1962); Mhlongo and Van Wyk (2019); Hulley and Van Wyk (2019); Thring and Weitz (2006) | 5         |
| <i>Furcraea foetida</i> (L.) Haw.<br>Synonyms: <i>Agave bulbosa</i> K.Koch, <i>Furcraea gigantea</i> Vent.                                                                             | Giant Cabuya, Green-aloe, Mauritius-hemp (E),<br>Isitaluka, Ubhumlane,<br>Ufayibe (Z) | Asparagaceae  | Shrub            | ns                | Musculo-skeletal inflammation                                                                                                                                                                                                            | Mhlongo and Van Wyk (2019)                                                                                                                | 1         |
| <i>Galenia africana</i> L. Synonyms:<br><i>Galenia linearis</i> Thunb.,<br><i>Galenia tenuifolia</i> Salisb.                                                                           | Geelbos, perdebos,<br>kraalbos (A), Kraalbos<br>(KS)                                  | Aizoaceae     | Shrub            | Leaves,<br>twigs  | Twig/leaf placed in tooth for toothache. Bathe in a weak infusion to relieve rheumatism. Leaf infusion used to treat leg pain. Used as wash or ointment as a rinse for toothache, rheumatism, pain and inflammation                      | Nortje and van Wyk (2015); Van Wyk et al. (2008); De Beer and Van Wyk (2011); Hulley and Van Wyk (2019); Philander (2011)                 | 5         |
| <i>Galium capense</i> Thunb. subsp.<br><i>namaquense</i> (Eckl. & Zeyh.)<br>Puff. Synonyms: <i>Galium capense</i> var. <i>scabrum</i> Sond.,<br><i>Galium namaquense</i> Eckl. & Zeyh. | Tiny-tots (E), Kleefgras<br>(A), Rooistorm (KS)                                       | Rubiaceae     | Herb             | Roots             | Used as snuff for headache                                                                                                                                                                                                               | Nortje and van Wyk (2015)                                                                                                                 | 1         |
| <i>Galium tomentosum</i> Thunb.<br>Synonyms: <i>Galium asperum</i> var. <i>villosum</i> Eckl. & Zeyh.,<br><i>Galium glabrum</i> Thunb.                                                 | Old Man's Beard (E),<br>Rooivergeet, Kleefgras (A),<br>Jantjiegoub (KS)               | Rubiaceae     | Herb             | Roots             | Roots are powdered and use as a snuff for headache. As a remedy for inflammation                                                                                                                                                         | Nortje and van Wyk (2015); Hulley and Van Wyk (2019); Philander (2011)                                                                    | 3         |

| <b>Botanical name</b>                                                                                                                              | <b>*Common name</b>                                                                                                                                       | <b>Family</b>    | <b>Life-form</b> | <b>#Part used</b> | <b>Application</b>                                                                       | <b>Reference</b>                                       | <b>Nm</b> |
|----------------------------------------------------------------------------------------------------------------------------------------------------|-----------------------------------------------------------------------------------------------------------------------------------------------------------|------------------|------------------|-------------------|------------------------------------------------------------------------------------------|--------------------------------------------------------|-----------|
| <i>Garcinia livingstonei</i> T.Anderson. Synonyms: <i>Garcinia angolensis</i> Vesque, <i>Garcinia livingstonei</i> var. <i>pallidinervia</i> Engl. | African mangosteen (E), Afrika-geelmelkhout (A), Muphiphi, mupimbi (V), umPhimbi, uGobandlovu (Z)                                                         | Clusiaceae       | Tree             | Roots             | Root decoction is used for toothache                                                     | Arnold and Gulumian (1984)                             | 1         |
| <i>Gasteria brachyphylla</i> (Salm-Dyck) van Jaarsv. Synonyms: <i>Aloe pseudonigricans</i> Salm-Dyck, <i>Gasteria triebneriana</i> Poelln.         | Klein Karoo ox-tongue (E), Klein Karoo-beestong, boesmanrys (A)                                                                                           | Xanthorrhoeaceae | Herb             | Leaves            | Compress on sores and sore foot                                                          | Hulley and Van Wyk (2019)                              | 1         |
| <i>Gazania krebsiana</i> Less. Synonyms: <i>Gazania mucronata</i> DC., <i>Meridiana oxyloba</i> (DC.) Kuntze                                       | terracotta gazania (E), gousblom, botterblom, rooi gazania (A), Ubendle, Umasonga (Z)                                                                     | Asteraceae       | Herb             | ns                | Internal side pain in children                                                           | Mhlongo and Van Wyk (2019)                             | 1         |
| <i>Gerbera piloselloides</i> (L.) Cass. Synonyms: <i>Arnica hirsuta</i> Forssk., <i>Gerbera peregrina</i> Steenis                                  | Pink and white gerbera (E), botterblom, Griekwateebossie (A), moarubetso (SS), Imbune yentaba, Uhlunguhlungu, Umoyawezwe (Z)                              | Asteraceae       | Herb             | ns                | Musculo-skeletal (inflammation). Used for treating headache and ear-ache                 | Mhlongo and Van Wyk (2019); Mbanjwa (2020)             | 2         |
| <i>Gladiolus dalenii</i> Van Geel. Synonyms: <i>Gladiolus adlami</i> Baker, <i>Gladiolus hockii</i> De Wild.                                       | African gladiolus (E), papegaai-gladiolus (A), khahla-e-kholo (SS), Isidwa, Isiqunga sikatikoloshe, Umabelejongosi, Umasendenja, Umlunge, Undwendweni (Z) | Iridaceae        | Herb             | Bulbs, ns         | Musculo-skeletal (back problem). Bulb decoction is used as ear drops to relieve ear-ache | Mhlongo and Van Wyk (2019); Arnold and Gulumian (1984) | 2         |
| <i>Gladiolus ecklonii</i> Lehm. Synonyms: <i>Gladiolus ecklonii</i> subsp. <i>ecklonii</i> , <i>Gladiolus inclusus</i> F.Bolus                     | sheathed gladiolus (E), kxahla, litsoantsoang, makhabebe (SS), Ibuthe, Isidwa, Incwincwi, Umabelejongosi, Umlunge (Z)                                     | Iridaceae        | Herb             | ns                | Musculo-skeletal (back problem)                                                          | Mhlongo and Van Wyk (2019)                             | 1         |

| <b>Botanical name</b>                                                                                                                                          | <b>*Common name</b>                                                                                                               | <b>Family</b> | <b>Life-form</b> | <b>#Part used</b> | <b>Application</b>                                                                                                                                                                                                | <b>Reference</b>                                                                                  | <b>Nm</b> |
|----------------------------------------------------------------------------------------------------------------------------------------------------------------|-----------------------------------------------------------------------------------------------------------------------------------|---------------|------------------|-------------------|-------------------------------------------------------------------------------------------------------------------------------------------------------------------------------------------------------------------|---------------------------------------------------------------------------------------------------|-----------|
| <i>Glycyrrhiza glabra</i> L.<br>Synonyms: <i>Glycyrrhiza brachycarpa</i> Boiss., <i>Glycyrrhiza violacea</i> Boiss. & Noe                                      | Licorice (E),<br>soethoutwortel (A)                                                                                               | Fabaceae      | Herb             | ns                | Used to treat inflammation and stomach ailments                                                                                                                                                                   | Hulley and Van Wyk (2019)                                                                         | 1         |
| <i>Gnidia capitata</i> L.f. Synonyms: <i>Lasiosiphon capitatus</i> (L. f.)<br>Burt Davy, <i>Lasiosiphon similis</i> C.H. Wright                                | Gifbos (A)                                                                                                                        | Thymelaeaceae | Shrub            | Bark              | For treating menstrual pains                                                                                                                                                                                      | Philander (2011)                                                                                  | 1         |
| <i>Gnidia deserticola</i> Gilg.<br>Synonyms: <i>Arthrosolen deserticola</i> (Gilg) Compton, <i>Lasiosiphon deserticola</i> (Gilg)<br>C.H. Wright               | Hotnotsverfbossie,<br>Saffraan, Saffraanbos,<br>Verfbossie (A)                                                                    | Thymelaeaceae | Shrub            | ns                | Used for the treatment of pain and inflammation                                                                                                                                                                   | Hulley and Van Wyk (2019)                                                                         | 1         |
| <i>Gnidia kraussiana</i> Meisn.<br>Synonyms: <i>Gnidia hoepjiwriana</i> , <i>Lasiosiphon hoepfnerianus</i> , <i>Lasiosiphon kraussianus</i> (Meisn.) Burt Davy | Yellow heads (E), gifbossie (A), umarhedeni (X), isidikili, imfuzane, umsilawengwe (Z)                                            | Thymelaeaceae | Herb             | Roots             | Strong enemas made from root extracts are taken for stomach complaints. Roots in milk decoctions for backache and stomach sores. Root decoctions or infusions are taken for chest complaints. For lower back pain | Hulme (1954); Watt and Breyer-Brandwijk (1962); Hutchings et al. (1996); Mbanjwa (2020)           | 4         |
| <i>Gomphocarpus cancellatus</i> (Burm.f.) Bruyns. Synonyms: <i>Asclepias arborescens</i> L., <i>Asclepias rotundifolia</i> Mill.                               | Wild cotton (E), bergmelkbos, bergtontelbos, dermhout, gansiesbos, katoenbos, melkbos, regopmelkbos (A), Bergtontelbos (KS)       | Apocynaceae   | Herb             | Leaves            | Applied as ointment on pains                                                                                                                                                                                      | Nortje and van Wyk (2015)                                                                         | 1         |
| <i>Gomphocarpus fruticosus</i> (L.) W.T.Aiton. Synonyms: <i>Asclepias fruticosa</i> , <i>Gomphocarpus crinitus</i> G.Bertol.                                   | Milkweed, narrow-leaved cotton bush, wild cotton (E), blaasoppies (A), Gewone (KS), ulusinga Iwesalukazi, umsinga-lwesalukazi (Z) | Apocynaceae   | Shrub            | Leaves, roots     | Leaf infusions are administered for stomach pain in children. Roots are used for general body pain and stomach ache. Root used as snuff for headache, dry leaves used as snuff for                                | Gerstner (1941); Hulme (1954); Pujol (1990); Watt and Breyer-Brandwijk (1962); Nortje and van Wyk | 7         |

| Botanical name                                                                                                                                    | *Common name                                                                                                                                                             | Family       | Life-form | #Part used      | Application                                                                                                                                                                                                                                                                                                                                                                                                                                                  | Reference                                                                                                        | Nm |
|---------------------------------------------------------------------------------------------------------------------------------------------------|--------------------------------------------------------------------------------------------------------------------------------------------------------------------------|--------------|-----------|-----------------|--------------------------------------------------------------------------------------------------------------------------------------------------------------------------------------------------------------------------------------------------------------------------------------------------------------------------------------------------------------------------------------------------------------------------------------------------------------|------------------------------------------------------------------------------------------------------------------|----|
|                                                                                                                                                   |                                                                                                                                                                          |              |           |                 | headache. Leaf decoction is taken orally as headache treatment                                                                                                                                                                                                                                                                                                                                                                                               | (2015); De Beer and Van Wyk (2011); Mogale et al. (2019)                                                         |    |
| <i>Gomphocarpus physocarpus</i> E.Mey. Synonyms: <i>Asclepias brasiliensis</i> (E.Fourn.) Schltr., <i>Gomphocarpus brasiliensis</i> E.Fourn.      | Balloon milkweed, balloon wild cotton, hairy balls, bindweed (E), balmelkbossie, balbossie, wilde kapok (A), Usinga, Uqhumane, Usingalwesalukazi, Usipha lwesalukazi (Z) | Apocynaceae  | Shrub     | Leaves, ns      | Analgesic (headache, internal side pains). Smoked leaves is used for headache                                                                                                                                                                                                                                                                                                                                                                                | Mhlongo and Van Wyk (2019); Mbanjwa (2020)                                                                       | 2  |
| <i>Gunnera perpensa</i> L. Synonyms: <i>Gunnera calthifolia</i> , <i>Perpensum blitispermum</i>                                                   | River pumpkin, wild Rhubarb (E), Iphuzi, Uxobo (X), Rivierpampoer (A), qobo (SS), Izibu, Ugobho, Uklenya, Uxobo (Z)                                                      | Gunneraceae  | Herb      | Roots, rhizomes | Together with other plants such as <i>Alepidea amatymbica</i> and <i>Crinum</i> sp., the root decoctions are taken for pain in rheumatic fever and stomachache. Musculo-skeletal (inflammation). Inflammation and menstrual pain. Root decoction is used to treat menstrual pain. Leaves used as compress on pain and inflammation especially rheumatism and backache. Used as compress for headache. Used for relieving menstrual pains and afterbirth pain | Bryant (1966); Mhlongo and Van Wyk (2019); Maroyi (2017); Bhat (2014); Hulley and Van Wyk (2019); Mbanjwa (2020) | 6  |
| <i>Gymnosporia rubra</i> (Harv.) Loes. Synonyms: <i>Maytenus mossambicensis</i> var. <i>rubra</i> (Harv.) Blakelock, <i>Celastrus ruber</i> Harv. | Red-flower Spikethorn, Red-flowered Spike-thorn (E), Rooibloem-pondoring (A), Ihlinzanyoka, Ithethe (Z)                                                                  | Celastraceae | Tree      | ns              | Analgesic (internal sharp body pains), musculo-skeletal (inflammation)                                                                                                                                                                                                                                                                                                                                                                                       | Mhlongo and Van Wyk (2019)                                                                                       | 1  |

| Botanical name                                                                                                                                                 | *Common name                                                                                                                                                                                                    | Family         | Life-form | #Part used  | Application                                                                                                       | Reference                                           | Nm |
|----------------------------------------------------------------------------------------------------------------------------------------------------------------|-----------------------------------------------------------------------------------------------------------------------------------------------------------------------------------------------------------------|----------------|-----------|-------------|-------------------------------------------------------------------------------------------------------------------|-----------------------------------------------------|----|
| <i>Gymnosporia senegalensis</i> (Lam.) Loes. Synonyms: <i>Catha europaea</i> Boiss., <i>Celastrus senegalensis</i> Lam.                                        | Confetti Spike-thorn, Confetti Tree, Red Spike-thorn (E), Rooidoring, Rooi-pendoring (A), Motlhono, Motlhôno, Motlhonu (TW), Sephatwa (NS), Tshibavhe, Tshiphandwa (V), Isihlangu, Isihlangwane, Ubuhlangwe (Z) | Celastraceae   | Shrub     | Leaves      | Leaves are used to treat stomachache                                                                              | Mongalo and Makhafola (2018)                        | 1  |
| <i>Haemanthus albiflos</i> Jacq. Synonyms: <i>Haemanthus albiflos</i> var. <i>brachyphyllus</i> Baker, <i>Haemanthus virescens</i> var. <i>pubescens</i> Herb. | white paint brush (E), witpoeierkwas (A), umathunga (X), uzaneke (Z)                                                                                                                                            | Amaryllidaceae | Herb      | Whole plant | Use for treating pains and arthritis                                                                              | Mintsa Mi Nzue (2009)                               | 1  |
| <i>Harpagophytum procumbens</i> (Burch.) DC. ex Meisn                                                                                                          | Devil's claw, harpago, grapple plant (E), bobbejaandubbeltjie, kludoring (A), lekgagamare, ghamaghoe (TW)                                                                                                       | Pedaliaceae    | Creepers  | Whole plant | Indicated as a treatment for rheumatism                                                                           | Van Wyk and Gericke (2000)                          | 1  |
| <i>Harpephyllum caffrum</i> Bernh.                                                                                                                             | Wild plum (E), wildepruim, kafferpruim (A), umgwenya (X), mothekele (NS), umgwcnya (Z)                                                                                                                          | Anacardiaceae  | Tree      | Bark        | Powdered burnt bark is used to treat sprains and fractures. Analgesic (lower back aches)                          | Hutchings et al. (1996); Mhlongo and Van Wyk (2019) | 2  |
| <i>Helichrysum aureonitens</i> Sch.Bip.                                                                                                                        | golden everlasting (E), goue sewejaartjie (A), toane-ntja, toane-poli (SS), Impepho, Intungwa (Z)                                                                                                               | Asteraceae     | Herb      | ns          | Analgesic (toothache), musculo-skeletal (inflammation) and headache                                               | Mhlongo and Van Wyk (2019); Mbanjwa (2020)          | 2  |
| <i>Helichrysum cymosum</i> (L.) D.Don. Synonyms: <i>Gnaphalium cernuum</i> Thunb., <i>Gnaphalium tricostatum</i> Sieber ex DC.                                 | Gold carpet (E), goue tapyt (A), imPepho, imPepha (X)                                                                                                                                                           | Asteraceae     | Herb      | Leaves      | Fresh leaves are boiled in water and the vapour used as vapour bath for treating headache. For treating toothache | Bhat and Jacobs (1995); Bhat (2013); Mbanjwa (2020) | 3  |

| <b>Botanical name</b>                                                                                                                                                 | <b>*Common name</b>                                                                                                                                               | <b>Family</b> | <b>Life-form</b> | <b>#Part used</b> | <b>Application</b>                                                                                                                                    | <b>Reference</b>                                                                    | <b>Nm</b> |
|-----------------------------------------------------------------------------------------------------------------------------------------------------------------------|-------------------------------------------------------------------------------------------------------------------------------------------------------------------|---------------|------------------|-------------------|-------------------------------------------------------------------------------------------------------------------------------------------------------|-------------------------------------------------------------------------------------|-----------|
| <i>Helichrysum luteoalbum</i> (L.) Rchb. Synonyms: <i>Gnaphalium luteoalbum</i> L., <i>Pseudognaphalium luteoalbum</i> (L.) Hilliard & B.L.Burt                       | Jersey cudweed (E), Impepho, Impepho emhlophe/ enkulu (Z)                                                                                                         | Asteraceae    | Herb             | ns                | Musculo-skeletal (inflammation)                                                                                                                       | Mhlongo and Van Wyk (2019)                                                          | 1         |
| <i>Helichrysum nudifolium</i> (L.) Less. Synonyms: <i>Anaxeton nudifolium</i> (L.) Gaertn., <i>Helichrysum asperifolium</i> Moeser, <i>Helichrysum leiopodium</i> DC. | Hottentot's tea, kaffir tea (E), Hottentotstee (A), letapiso, mohlomela-tsie- oa-thaba (SS), icholocholo, icolocolo (X); isidwaba- somkhovu, umagada- emthini (Z) | Asteraceae    | Herb             | Leaves            | Menstrual pain. Fresh leaves are boiled and the hot lotion is used to foment swollen feet for rapid recovery                                          | Maroyi (2017); Bhat (2013)                                                          | 2         |
| <i>Helichrysum odoratissimum</i> (L.) Sweet. Synonyms: <i>Gnaphalium strigosum</i> Thunb., <i>Helichrysum rosmarinum</i> Mattf.                                       | Most fragrant helichrysum (E), kooigoed, kruie (A), iphepho (X), Hotnotskooigoed (KS)                                                                             | Asteraceae    | Herb             | Whole plant, ns   | Infusion used for backache. Whole plant is used for headache. Used for treating pain and inflammation, backache, toothache, menstrual pains and cramp | Nortje and van Wyk (2015); Maroyi (2017); Hulley and Van Wyk (2019); Mbanjwa (2020) | 4         |
| <i>Helichrysum patulum</i> (L.) D.Don. Synonyms: <i>Gnaphalium divaricatum</i> P.J.Bergius, <i>Helichrysum crispum</i> (L.) D.Don                                     | honey everlasting (E), kooigoed (A), impepho (X)                                                                                                                  | Asteraceae    | Herb             | Leaves            | Dried leaf infusions drunk as infusion, approx 25 ml taken 2–3 times per day until symptoms of arthritis, headache and rheumatism to disappear        | Thring and Weitz (2006)                                                             | 1         |
| <i>Helichrysum pedunculatum</i> Hilliard & B.L.Burt. Synonyms: <i>Helichrysum pedunculare</i> (L.) DC., <i>Helichrysum pedunculare</i> var. <i>pedunculare</i>        | Indlebe zebokwe, uNdleni, isicwe, siggutsi (X)                                                                                                                    | Asteraceae    | Herb             | Leaves            | Leaves are used after circumcision to prevent inflammation externally                                                                                 | Bhat and Jacobs (1995); Bhat (2014)                                                 | 2         |
| <i>Helichrysum pumilio</i> (O.Hoffm.) Hilliard & B.L.Burt. Synonyms: <i>Helichrysum bolusianum</i>                                                                    | Sewejaartjie, wolbossie (A)                                                                                                                                       | Asteraceae    | Herb             | Whole plant       | Prepare as infusion and drank to treat rheumatism                                                                                                     | Van Wyk et al. (2008)                                                               | 1         |



| Botanical name                                                                                                                                                                                    | *Common name                                                                                                                                                      | Family        | Life-form | #Part used  | Application                                                                                                                                                             | Reference                                         | Nm |
|---------------------------------------------------------------------------------------------------------------------------------------------------------------------------------------------------|-------------------------------------------------------------------------------------------------------------------------------------------------------------------|---------------|-----------|-------------|-------------------------------------------------------------------------------------------------------------------------------------------------------------------------|---------------------------------------------------|----|
| Moeser, <i>Helichrysum laneum</i><br>S.Moore                                                                                                                                                      |                                                                                                                                                                   |               |           |             |                                                                                                                                                                         |                                                   |    |
| <i>Helichrysum rutilans</i> (L.)<br>D.Don. Synonyms: <i>Gnaphalium rutilans</i> L., <i>Helichrysum manopappum</i> O.Hoffm.,                                                                       | Kooigoedbos (KS)                                                                                                                                                  | Asteraceae    | Herb      | ns          | infusion used for backache                                                                                                                                              | Nortje and van Wyk (2015)                         | 1  |
| <i>Helinus integrifolius</i> (Lam.)<br>Kuntze. Synonyms: <i>Helinus ovatus</i> , <i>Helinus scandens</i>                                                                                          | Soap bush, soap creeper (E), seepbos, seepbossie (A), tyolo, Ukumbuqwekwe (X), ubhubhubhu, ubububu (Z)                                                            | Rhamnaceae    | Shrub     | Roots       | Root decoctions are taken for backache                                                                                                                                  | Hutchings et al. (1996)                           | 1  |
| <i>Hermstaedtia glauca</i><br>(J.C.Wendl.) Rchb. ex Steud.                                                                                                                                        | Bokhout (A), Bokhoutjie (KS)                                                                                                                                      | Amaranthaceae | Shrub     | ns          | Used with <i>grashoutjie</i> for backache                                                                                                                               | Nortje and van Wyk (2015)                         | 1  |
| <i>Heteromorpha arborescens</i><br>(Spreng.) Cham. & Schtdl.<br>Synonyms: <i>Heteromorpha arborescens</i> var. <i>collina</i> (Eckl. & Zeyh.) Sond., <i>Tenoria arborescens</i> (Spreng.) Spreng. | Parsley tree (E), wildepietersielie, pietersieliebos (A), umbangadlala, umbangandlatho, umbangeza, iyeza-lempambano (X), Muthatha-vhanna (V), umbangadlala (Z)    | Apiaceae      | Tree      | Roots       | Root decoction is used to prepare soft porridge to relieve general body pain and headache                                                                               | Mabogo (1990)                                     | 1  |
| <i>Heteromorpha trifoliata</i><br>(Wendl.) Eckl. & Zeyh.<br>Synonyms: <i>Heteromorpha arborescens</i> var. <i>abyssinica</i> , <i>Bupleurum arborescens</i> , <i>Bupleurum trifoliatum</i>        | Parsley tree (E), kraaibos, stinkbos, wildepieterselie (A), Mokadala (NS), Mula-notshi, Muthatha-vhanna (V), umbangadlala (X), umbangandlala, Umbhangandlahla (Z) | Apiaceae      | Tree      | Bark, roots | Bark is used for colic. Root infusions are used for headaches and pain in the chest and back. Smoke from burning unspecified part of the plant is inhaled for headaches | Gerstner (1941); Watt and Breyer-Brandwijk (1962) | 2  |
| <i>Heteropyxis natalensis</i> Harv.                                                                                                                                                               | Lavender Tree (E), Laventelboom (A), Umkhuze, Umkluza (Z)                                                                                                         | Myrtaceae     | Tree      | ns          | Analgesic (lower back pains)                                                                                                                                            | Mhlongo and Van Wyk (2019)                        | 1  |

| Botanical name                                                                                                                                                | *Common name                                                                                                                                               | Family       | Life-form | #Part used           | Application                                                                                                                                                        | Reference                                                                                  | Nm |
|---------------------------------------------------------------------------------------------------------------------------------------------------------------|------------------------------------------------------------------------------------------------------------------------------------------------------------|--------------|-----------|----------------------|--------------------------------------------------------------------------------------------------------------------------------------------------------------------|--------------------------------------------------------------------------------------------|----|
| <i>Hibiscus aethiopicus</i> var. <i>ovatus</i> Harv. Synonyms: <i>Hibiscus leiospermus</i> Harv., <i>Hibiscus aethiopicus</i> var. <i>asperifolius</i> Hochr. | Dwarf yellow hibiscus (E), umhlophe, uvemvane (Z)                                                                                                          | Malvaceae    | Herb      | Roots                | Poultices from the pounded roots are applied to swollen joints and sprains                                                                                         | Hulme (1954); Watt and Breyer-Brandwijk (1962)                                             | 2  |
| <i>Hippobromus pauciflorus</i> Radlk. Synonyms: <i>Hippobromus alata</i> (Thunb.) Eckl. & Zeyh., <i>Rhus alatum</i> Thunb.                                    | Bastard Horsewood, False Horsewood, Horsewood (E), Basterperdepis, Basterperdepisboom (A), Isiqhume, Uqhume (Z)                                            | Sapindaceae  | Tree      | Leaves, roots, stems | Analgesic (internal side pains). Used for headache and toothache                                                                                                   | Mhlongo and Van Wyk (2019); Mintsami Nzue (2009)                                           | 2  |
| <i>Holarrhena pubescens</i> Wall. ex G.Don. Synonyms: <i>Chonemorpha antidysenterica</i> (Roth) G.Don, <i>Holarrhena perrotii</i> Spire                       | Makhulu-wamuhatu, khatha-khathane (V)                                                                                                                      | Apocynaceae  | Shrub     | Roots                | Root decoction is used to prepare porridge for 3 days to relieve stomachache in women                                                                              | Arnold and Gulumian (1984)                                                                 | 1  |
| <i>Hoodia gordonii</i> (Masson) Sweet ex Decne. Synonyms: <i>Scytanthus gordonii</i> (Masson) Hook., <i>Stapelia gordonii</i> Masson                          | bitter ghaap (E), bitterghaap, muishondghaap, wolweghaap, bobbejaanghaap, bergghaap, bokhorings (A)                                                        | Apocynaceae  | Herb      | Stem                 | To treat stomach pain. Used for the treatment of backache, headache and stomachache                                                                                | De Beer and Van Wyk (2011); Hulley and Van Wyk (2019)                                      | 2  |
| <i>Hydnora africana</i> Thunb. Synonyms: <i>Aphyteia africana</i> (Thunb.) Oken, <i>Hydnora longicollis</i> Welw.                                             | Jackal food (E), jakkalskos, bobbejaankos (A), Jakkelskos (KS)                                                                                             | Hydnoraceae  | Herb      | Fruit                | Dried fruit pericarp ( <i>skil</i> ) is ground and used as an infusion for body pains                                                                              | Nortje and van Wyk (2015)                                                                  | 1  |
| <i>Hypoxis colchicifolia</i> Baker. Synonyms: <i>Hypoxis distachya</i> Nel, <i>Hypoxis oligotricha</i> Baker                                                  | Broad-leaved hypoxis (E), iLabatheka (Z)                                                                                                                   | Hypoxidaceae | Herb      | Bulbs, roots         | For treating arthritis                                                                                                                                             | Mintsami Nzue (2009)                                                                       | 1  |
| <i>Hypoxis hemerocallidea</i> Fisch., C.A.Mey. & Avé-Lall. Synonyms: <i>Hypoxis rooperi</i> S. Moore, <i>Hypoxis patula</i> Nel                               | African potato, Star flower, yellow star (E), sterblom, geelsterretjie, gifbol (A), moli kharatsa, lotsane (SS), tshuka (TW), inongwe, ixhalanxa, ikhubalo | Hypoxidaceae | Herb      | Corms, rootstock     | Infusions and decoctions of the plant are used for rheumatism. Juice from the rootstock is applied to burns. Corms are traditionally used for headaches. Analgesic | Hutchings et al. (1996); Van Wyk and Gericke (2000); Mhlongo and Van Wyk (2019); Philander | 5  |

| Botanical name                                                                                                                                                            | *Common name                                                                                                                         | Family           | Life-form | #Part used | Application                                                                                     | Reference                                                 | Nm |
|---------------------------------------------------------------------------------------------------------------------------------------------------------------------------|--------------------------------------------------------------------------------------------------------------------------------------|------------------|-----------|------------|-------------------------------------------------------------------------------------------------|-----------------------------------------------------------|----|
|                                                                                                                                                                           | lezithunzela (X), inkomfe, inkomfe enkulu (Z)                                                                                        |                  |           |            | (back pains, sharp internal body pains), musculo-skeletal (arthritis)                           | (2011); Mintsami Nzue (2009)                              |    |
| <i>Hypoxis rigidula</i> Baker.<br>Synonyms: <i>Hypoxis cordata</i> Nel, <i>Hypoxis volkmanniae</i> Dinter                                                                 | Yellow Star, Farmer's String, Silver-leaved Star-flower (E), Botterblom (A), Tieane (SS), Inkomfe, Umhungulo (Z)                     | Hypoxidaceae     | Herb      | ns         | Analgesic (general body pains, sharp internal body pains)                                       | Mhlongo and Van Wyk (2019)                                | 1  |
| <i>Ilex mitis</i> (L.) Radlk var. <i>mitis</i> .<br>Synonyms: <i>Ilex capensis</i> Sond. & Harv., <i>Sideroxylon nigricans</i> Dum.Cours.                                 | African/Cape holly, water tree (E), monamane (NS), umDuma (X), phukgu, phukgile (SS), mutanzwakhamele (V), iphuphuma, umdumowazo (Z) | Aquifoliaceae    | Tree      | ns         | Used for rheumatism. Enemas made from unspecified parts are administered to children with colic | Hutchings et al. (1996); Watt and Breyer-Brandwijk (1962) | 2  |
| <i>Ipomoea bolusiana</i> Schinz.<br>Synonyms: <i>Ipomoea angustisecta</i> Engl., <i>Ipomoea simplex</i> auct. non Thunb.                                                  | Narrow-leaved pink ipomoea (E), Seakhoe (SS)                                                                                         | Convolvulaceae   | Herb      | Bulbs      | Bulb is used to treat foot ache                                                                 | Mongalo and Makhafola (2018)                              | 1  |
| <i>Ipomoea cairica</i> (L.) Sweet.<br>Synonyms: <i>Convolvulus cairicus</i> L., <i>Ipomoea stipulacea</i> Jacq.                                                           | Coast morning glory, five-fingered morning glory, Cairo morning glory, Messina creeper, mile-a-minute, (E), Ijalamu, Ingingolo (Z)   | Convolvulaceae   | Climber   | ns         | Analgesic (internal side pains)                                                                 | Mhlongo and Van Wyk (2019)                                | 1  |
| <i>Ipomoea crassipes</i> Hook.<br>Synonyms: <i>Ipomoea calystegioides</i> Hallier f., <i>Ipomoea sarmentacea</i> Rendle                                                   | Leafy-flowered Ipomea (E), Ijalamu, Uvimbukhalo (Z)                                                                                  | Convolvulaceae   | Creeper   | ns         | Musculo-skeletal (inflammation)                                                                 | Mhlongo and Van Wyk (2019)                                | 1  |
| <i>Jamesbrittenia atropurpurea</i> (Benth.) Hilliard. Synonyms: <i>Chaenostoma croceum</i> (Eckl. ex Benth.) Wettst. ex Diels., <i>Sutera atropurpurea</i> (Benth.) Hiern | Bruinsafraanbos, Geelblommetjie (A)                                                                                                  | Scrophulariaceae | Shrub     | Leaves     | Leaves used for toothache and general pains                                                     | De Beer and Van Wyk (2011)                                | 1  |

| Botanical name                                                                                                                                                | *Common name                                                                            | Family        | Life-form | #Part used                | Application                                                                       | Reference                                                 | Nm |
|---------------------------------------------------------------------------------------------------------------------------------------------------------------|-----------------------------------------------------------------------------------------|---------------|-----------|---------------------------|-----------------------------------------------------------------------------------|-----------------------------------------------------------|----|
| <i>Jatropha curcas</i> L. Synonyms: <i>Castiglionea lobata</i> Ruiz & Pav., <i>Ricinus americanus</i> Mill.                                                   | Physic nut, Barbados nut, poison nut, bubble bush or purging nut (E), mupfure-donga (V) | Euphorbiaceae | Shrub     | Root                      | Root decoction is used to rinse the oral cavity to relieve toothache              | Arnold and Gulumian (1984)                                | 1  |
| <i>Juncus lomatophyllus</i> Spreng. Synonyms: <i>Juncus capensis</i> var. <i>latifolius</i> E.Mey., <i>Juncus viridifolius</i> Adamson                        | Imfe-yesele (X)                                                                         | Juncaceae     | Herb      | Leaves                    | Leaf decoction are applied externally to prevent inflammation of wound            | Bhat and Jacobs (1995)                                    | 1  |
| <i>Kalanchoe pinnata</i> (Lam.) Pers. Synonym: <i>Bryophyllum pinnatum</i> (Lam.) Oken                                                                        | Air plant, cathedral bells, life plant, miracle leaf (E), Inyathelo, Umvuthuza (Z)      | Crassulaceae  | Herb      | ns                        | Analgesic (tooth ache), musculo-skeletal (inflammation)                           | Mhlongo and Van Wyk (2019)                                | 1  |
| <i>Kedrostis africana</i> (L.) Cogn. Synonyms: <i>Kedrostis digitata</i> Cogn., <i>Kedrostis punctulata</i> Cogn.                                             | Baboon's Cucumber (E), bojaankamoo, bitterpatat (A)                                     | Cucurbitaceae | Climber   | ns                        | Used to treat stomach ailment                                                     | Hulley and Van Wyk (2019)                                 | 1  |
| <i>Kedrostis capensis</i> A. Meeuse. Synonym: <i>Pisosperma capense</i> Sond.                                                                                 | Bitterpatat (A)                                                                         | Cucurbitaceae | Climber   | ns                        | Used for the treatment of stomach ailments                                        | Hulley and Van Wyk (2019)                                 | 1  |
| <i>Kedrostis foetidissima</i> (Jacq.) Cogn. Synonyms: <i>Kedrostis foetidissima</i> subsp. <i>obtusiloba</i> Meeuse, <i>Rhynchocharpa foetida</i> C.B. Clarke | Ystervarkpatat (A)                                                                      | Cucurbitaceae | Climber   | ns                        | Used for the treatment of stomach ailments                                        | Hulley and Van Wyk (2019)                                 | 1  |
| <i>Kedrostis leloja</i> (Forssk. ex J.F Gmel.) C.Jeffrey                                                                                                      | Makgonatšohle (SP)                                                                      | Cucurbitaceae | Herb      | Whole plant               | Whole plant can be mixed with bathing water to treat aching body                  | Mogale et al. (2019)                                      | 1  |
| <i>Kedrostis nana</i> var. <i>zeyheri</i> A. Meeuse. Synonym: <i>Kedrostis zeyheri</i> Cogn.                                                                  | kalmoes, bitterhout (A)                                                                 | Cucurbitaceae | Climber   | Roots                     | Medicine for stomachache                                                          | Van Wyk et al. (2008); Hulley and Van Wyk (2019)          | 2  |
| <i>Kigelia africana</i> (Lam.) Benth. Synonyms: <i>Bignonia africana</i> , <i>Kigelia pinnata</i>                                                             | Sausage-tree (E), kalabasboom (A), Mutshata, Muvevha (V),                               | Bignoniaceae  | Tree      | Bark, fruits, Stem, twigs | Bark is used for toothache. Powdered dried fruit is used for rheumatism. Stem and | Hutchings et al. (1996); Watt and Breyer-Brandwijk (1962) | 2  |

| Botanical name                                                                                                                                                  | *Common name                                                                                                         | Family        | Life-form | #Part used | Application                                                                          | Reference                                           | Nm |
|-----------------------------------------------------------------------------------------------------------------------------------------------------------------|----------------------------------------------------------------------------------------------------------------------|---------------|-----------|------------|--------------------------------------------------------------------------------------|-----------------------------------------------------|----|
|                                                                                                                                                                 | umvungura, Umvongothi (Z)                                                                                            |               |           |            | twigs are rheumatism and other stomach ailment                                       |                                                     |    |
| <i>Lagenaria siceraria</i> (Molina) Standl. Synonyms: <i>Cucumis bicirrhia</i> J.R.Forst. ex Guill., <i>Lagenaria vulgaris</i> subsp. <i>asiatica</i> Kobjakova | bottle gourd, calabash (E), kalbas (A), moraka (NS), segwana (TW), Muphapha (V), iselwa (X, Z)                       | Cucurbitaceae | Creeper   | Leaves     | Cooked leaves are eaten by women as potherbs at the same time relieving period pains | Mokganya and Tshisikhawe (2019)                     | 1  |
| <i>Landolphia kirkii</i> Dyer. Synonyms: <i>Clitandra stapfiana</i> A.Chev., <i>Landolphia polyantha</i> K.Schum.                                               | Rubber vine, Sand apricot-vine (E)                                                                                   | Apocynaceae   | Shrub     | Roots      | The root is infused in water and the water is gargled to relieve toothache           | Corrigan et al. (2011)                              | 1  |
| <i>Lannea schweinfurthii</i> Engl.                                                                                                                              | false-marula (E), valsmaroela (A), mmopu (NS), umganunkomo (Z)                                                       | Anacardiaceae | Tree      | Roots      | Root decoction is used for body aches                                                | Tshikalange et al. (2016)                           | 1  |
| <i>Lantana camara</i> L. Synonyms: <i>Lantana undulata</i> Raf., <i>Lantana mexicana</i> Turner                                                                 | tickberry (E), Tshidzimbampotolo (V)                                                                                 | Verbenaceae   | Shrub     | Roots      | Dried roots are burned and smoked over private parts for dysmenorrhoea.              | Mahwasane et al. (2013)                             | 1  |
| <i>Ledebouria apertiflora</i> (Baker) Jessop. Synonyms: <i>Drimia apertiflora</i> Baker, <i>Scilla linearifolia</i> Baker                                       | Desert African hyacinth (E)                                                                                          | Asparagaceae  | Herb      | Bulbs      | The bulb is crushed and rubbed on painful areas of the body                          | Mogale et al. (2019)                                | 1  |
| <i>Ledebouria floribunda</i> (Baker) Jessop. Synonyms: <i>Scilla floribunda</i> Baker, <i>Scilla princeps</i> Baker                                             | spotted African hyacinth (E), Ikhambi lezingane, Iscociso, Umababaza, Umbola, Umbola wentaba (Z)                     | Asparagaceae  | Herb      | ns         | Abnormal abdominal pains and abdominal swelling in infants                           | Mhlongo and Van Wyk (2019)                          | 1  |
| <i>Ledebouria ovatifolia</i> (Baker) Jessop. Synonyms: <i>Scilla cicatricosa</i> , <i>Scilla elevans</i> , <i>Scilla ovatifolia</i>                             | Flat-leaved African hyacinth (E), untanganazibomvu (X), Ikhambi lezingane, Imbiza yezingane, Intelezi, Umababaza (Z) | Asparagaceae  | Herb      | Bulbs      | Bulbs are taken for backache. Abnormal abdominal pains and abdominal swelling        | Hutchings et al. (1996); Mhlongo and Van Wyk (2019) | 2  |

| Botanical name                                                                                                                                    | *Common name                                                                                                                                                                     | Family       | Life-form | #Part used      | Application                                                                                                                                                                                                                                                                                                                          | Reference                                                                         | Nm |
|---------------------------------------------------------------------------------------------------------------------------------------------------|----------------------------------------------------------------------------------------------------------------------------------------------------------------------------------|--------------|-----------|-----------------|--------------------------------------------------------------------------------------------------------------------------------------------------------------------------------------------------------------------------------------------------------------------------------------------------------------------------------------|-----------------------------------------------------------------------------------|----|
| <i>Leonotis leonurus</i> (L.) R.Br.<br>Synonyms: <i>Hemisodon leonurus</i> (L.) Raf., <i>Phlomis leonurus</i> L.                                  | Wild dagga, lion's ear, leonotis (E), wildedagga, duiwelstabak (A), imvovo, utywala-bengcungcu, umfincafincane, umunyamunya (X), umfincafincane, umcwili, utshwala-bezinyoni (Z) | Lamiaceae    | Shrub     | Leaves, flowers | Leaf decoction is taken orally to treat headache. Used to treat stomach ailments, backache, pain and inflammation. An infusion is made from a handful of leaves and flowers steeped in boiling water and left to draw in a glass bottle. About 25 ml is drunk morning and night for the arthritis, backache, headache and rheumatism | Bhat (2013); Hulley and Van Wyk (2019); Philander (2011); Thring and Weitz (2006) | 4  |
| <i>Leonotis ocymifolia</i> (Burm.f.) Iwarsson. Synonyms: <i>Leonotis capensis</i> Raf., <i>Phlomis ocymifolia</i> Burm.f.                         | Minaret flower, lion's ear, rock lion's paw (E), Klipdagga, wildedagga (A), umcwili (Z)                                                                                          | Lamiaceae    | Shrub     | Leaves          | Dried, powdered leaves used as a snuff for headache. Used to treat backache, pain and inflammation.                                                                                                                                                                                                                                  | Van Wyk et al. (2008); Hulley and Van Wyk (2019)                                  | 2  |
| <i>Lepidium africanum</i> (Burm.f.) DC. Synonyms: <i>Lepidium africanum subsp. divaricatum</i> (Aiton) Jonsell, <i>Lepidium tasmanicum</i> Thell. | Birdseed, Cape Pepper Cress, Peppergrass, Pepperweed, Pepperwort (E), Kanariesaadgras, Peperbossie (A), Sebista (SS)                                                             | Brassicaceae | Herb      | Roots           | Root is eaten to treat stomachache                                                                                                                                                                                                                                                                                                   | Hulley and Van Wyk (2019)                                                         | 1  |
| <i>Lessertia inflata</i> Harv. Synonym: <i>Lessertia versicaria</i> E.Mey.                                                                        | Seeroogbossie, lê-wildekeur (A)                                                                                                                                                  | Fabaceae     | Herb      | ns              | For stomachache                                                                                                                                                                                                                                                                                                                      | Van Wyk et al. (2008)                                                             | 1  |
| <i>Leucas lavandulifolia</i> Sm. Synonyms: <i>Leonurus indicus</i> L., <i>Leucas linifolia</i> (Roth) Spreng. <i>Leucas indica</i> (L.) Vatke     | Umagumede (Z)                                                                                                                                                                    | Lamiaceae    | Herb      | ns              | Analgesic (fever, back aches, headache)                                                                                                                                                                                                                                                                                              | Mhlongo and Van Wyk (2019)                                                        | 1  |
| <i>Lichtensteinia lacera</i> Cham. & Schldtl. Synonyms: <i>Lichtensteinia lacera</i> var. <i>lacera</i> , <i>Lichtensteinia lacera</i>            | Larger tinsel flower (E), Kalmoes (A), iQwili (X)                                                                                                                                | Apiaceae     | Herb      | Whole plant     | For relieving headache                                                                                                                                                                                                                                                                                                               | Mintsa Mi Nzue (2009)                                                             | 1  |

| Botanical name                                                                                                                                                         | *Common name                                                                                                                                           | Family                                         | Life-form | #Part used          | Application                                                                                                                          | Reference                                           | Nm |
|------------------------------------------------------------------------------------------------------------------------------------------------------------------------|--------------------------------------------------------------------------------------------------------------------------------------------------------|------------------------------------------------|-----------|---------------------|--------------------------------------------------------------------------------------------------------------------------------------|-----------------------------------------------------|----|
| Cham. & Schltl. var. <i>pinnatifida</i> Sond.                                                                                                                          |                                                                                                                                                        |                                                |           |                     |                                                                                                                                      |                                                     |    |
| <i>Limeum aethiopicum</i> Burm. f.<br>Synonyms: <i>Limeum aethiopicum</i> subsp. <i>aethiopicum</i> , <i>Limeum aethiopicum</i> var. <i>aethiopicum</i>                | Boesmandagga, koggelmandervoet (A)                                                                                                                     | Molluginaceae (Limeaceae – World Flora Online) | Herb      | ns                  | Infusion is used to treat headache                                                                                                   | Hulley and Van Wyk (2019)                           | 1  |
| <i>Linum thunbergii</i> Eckl. & Zeyh.                                                                                                                                  | Wild flax (E), Wildevlas (A), Bohlokoana (SS), ithalel impofu (Z)                                                                                      | Linaceae                                       | Herb      | Root                | Root decoction used for relieving pain.                                                                                              | Watt and Breyer-Brandwijk (1962)                    | 1  |
| <i>Lippia javanica</i> (Burm.f.) Spreng. Synonyms: <i>Lantana galpiniana</i> , <i>Lippia asperifolia</i> , <i>Verbena javanica</i>                                     | Fever tea, lemon bush, wild sage (E), koorsbossie, beukesbossie, lemoenbossie (A), musukudu, bokhukhwane (TW), inzinziniba (X); umsuzwane, umswazi (Z) | Verbenaceae                                    | Tree      | Leaves, roots       | Leaves are used for headaches while roots are used for headaches and backache. Analgesic (headache), musculo-skeletal (inflammation) | Hutchings et al. (1996); Mhlongo and Van Wyk (2019) | 2  |
| <i>Lobelia flaccida</i> (C.Presl) A.DC. Synonyms: <i>Lobelia bellidifolia</i> f. <i>flexuosa</i> Zahlbr., <i>Rapuntium bellidifolium</i> var. <i>brevidens</i> C.Presl | Itshilizi (X)                                                                                                                                          | Campanulaceae                                  | Herb      | Leaves              | For abdominal pain                                                                                                                   | Maroyi (2017)                                       | 1  |
| <i>Lobostemon fruticosus</i> (L.) H.Buek Synonyms: <i>Echium fruticosum</i> var. <i>minor</i> Sims, <i>Lobostemon obovatus</i> DC. & A.DC.                             | Pajama bush, 8-days (E), agtdaegeneesbos, lobos, douwurmbos, luibos (A)                                                                                | Boraginaceae                                   | Shrub     | Leaves, whole plant | For treating stomachache and pains                                                                                                   | Philander (2011); Mintsu Mi Nzue (2009)             | 2  |
| <i>Lopholaena coriifolia</i> (Sond.) E.Phillips & C.A.Sm. Synonyms: <i>Lopholaena bainesii</i> (Oliv. & Hiern) S.Moore, <i>Othonna coriifolia</i> Sond.                | Leather-leaved Fluff-bush (E), Pluisiesbos (A)                                                                                                         | Asteraceae                                     | Shrub     | Branches            | Dried branches are burned and the smoke is inhaled to treat headaches                                                                | Mogale et al. (2019)                                | 1  |
| <i>Macrotyloma maranguense</i> (Taub.) Verdc.                                                                                                                          | Xikondlo (Xitsonga)                                                                                                                                    | Fabaceae                                       | Herb      | Bulbs               | Bulb is chewed as remedy for swollen or painful testicles                                                                            | Tshikalange et al. (2016)                           | 1  |

| <b>Botanical name</b>                                                                                                                                                    | <b>*Common name</b>                                                                                                                                             | <b>Family</b> | <b>Life-form</b> | <b>#Part used</b> | <b>Application</b>                                                                                                                            | <b>Reference</b>                        | <b>Nm</b> |
|--------------------------------------------------------------------------------------------------------------------------------------------------------------------------|-----------------------------------------------------------------------------------------------------------------------------------------------------------------|---------------|------------------|-------------------|-----------------------------------------------------------------------------------------------------------------------------------------------|-----------------------------------------|-----------|
| <i>Maerua caffra</i> (DC.) Pax.<br>Synonyms: <i>Maerua triphylla</i> (Thunb.) T.Durand & Schinz, <i>Niebuhria triphylla</i> (Thunb.) H.L.Wendl.                          | Common bush-cherry, White-wood (E), Witbos (A), Gwambazi-Mukundulela (V)                                                                                        | Capparaceae   | Tree             | Root              | Root decoction is used to prepare soft porridge to relieve headache due to indigestion. Roots are buned and smoke inhaled to relieve headache | Arnold and Gulumian (1984)              | 1         |
| <i>Maesa lanceolata</i> Forssk.<br>Synonyms: <i>Baeobotrys ovata</i> Willd. ex Schult., <i>Maesa trichophlebia</i> Baker                                                 | false assegai (E); valsassegaai (A), intendekwane (X), muunguri (Venda), Isidende (Z)                                                                           | Maesaceae     | Shrub            | ns                | Musculo-skeletal (inflammation)                                                                                                               | Mhlongo and Van Wyk (2019)              | 1         |
| <i>Manilkara concolor</i> (Harv.) Gerstner. Synonym: <i>Mimusops concolor</i>                                                                                            | Zulu milkberry (E), Zoeloemelkbessie (A), umncambu, umnqambo (Z)                                                                                                | Sapotaceae    | Tree             | Rootbark          | Rootbark decoctions are administered as powerful enemas for back pain                                                                         | Palmer and Pitman (1961)                | 1         |
| <i>Manilkara discolor</i> (Sond.) J.H.Hemsl. Synonyms: <i>Eichleria discolour</i> , <i>Labourdonnaisia discolour</i> , <i>Mahea natalensis</i> , <i>Muriea discolour</i> | Forest milkberry, red milkwood (E), rooimelkhout, bosmelkbessie (A), umnqambo, unweba(-wentaba) (Z)                                                             | Sapotaceae    | Tree             | Rootbark          | Rootbark decoctions are administered as powerful enemas for back pain and also for brittle bones                                              | Palmer and Pitman (1961); Pooley (1993) | 2         |
| <i>Manilkara mochisia</i> (Baker) Dubard. Synonyms: <i>Manilkara macaulayae</i> , <i>Mimusops mochisia</i>                                                               | Lowveld milkberry (E), laeveldmelkbessie (A), Munamba (V), mvambu, umncambu (Z)                                                                                 | Sapotaceae    | Tree             | Roots             | Root used in enemas for back pain                                                                                                             | Palmer and Pitman (1961); Pooley (1993) | 2         |
| <i>Maytenus peduncularis</i> Loes. Synonyms: <i>Celastrus peduncularis</i> Sond., <i>Gymnosporia peduncularis</i> (Sond.) Loes.                                          | Cape Blackwood, Indigenous Blackwood (E), Kaapse Swarthout (A), Makhulu-wa-mukwatule (V), Umnqai, Umnqayi, Umnqayinqayi, Umnqayinqayi (X), Inqayi Elimnyama (Z) | Celastraceae  | Tree             | Roots             | Root decoction is drunk 4 times daily for backache in male                                                                                    | Arnold and Gulumian (1984)              | 1         |



| <b>Botanical name</b>                                                                | <b>*Common name</b>                                                                                                                                                         | <b>Family</b> | <b>Life-form</b> | <b>#Part used</b>   | <b>Application</b>                                                                                                                                                                                                                                                                                                                                                                                                    | <b>Reference</b>                                                                                      | <b>Nm</b> |
|--------------------------------------------------------------------------------------|-----------------------------------------------------------------------------------------------------------------------------------------------------------------------------|---------------|------------------|---------------------|-----------------------------------------------------------------------------------------------------------------------------------------------------------------------------------------------------------------------------------------------------------------------------------------------------------------------------------------------------------------------------------------------------------------------|-------------------------------------------------------------------------------------------------------|-----------|
| <i>Melianthus comosus</i> Vahl.<br>Synonym: <i>Diplerisma comosum</i> (Vahl) Planch. | Touch-me-not, honey flower (E), Kruidjie-roermy-nie (A), ibonya (Z)                                                                                                         | Melanthaceae  | Shrub            | Leaves, whole plant | Plant decoctions are used to bathe rheumatic limbs and painful feet while leaf paste has also been used to reduce the swelling of bruises. Herb is applied topically for inflammation of legs. Boiled leaves is applied to painful knees. For treating rheumatism painful back and legs. Used as a wash for pain and inflammation, backache, rheumatism, wounds, sores and as a rinse for toothache and to pull teeth | Hutchings et al. (1996); Van Wyk et al. (2008); De Beer and Van Wyk (2011); Hulley and Van Wyk (2019) | 4         |
| <i>Melianthus major</i> L.                                                           | Honey flower, melianthus, giant honey flower, touch-me-not (E), kruidjie-roermy-nie, heuningblom, klappers, krikkiebos (A), ubuhlungubemamba, ubutyayi (X), ibonya (Z)      | Melanthaceae  | Shrub            | Leaves              | External poultice for pain and rheumatism                                                                                                                                                                                                                                                                                                                                                                             | Philander (2011)                                                                                      | 1         |
| <i>Melianthus pectinatus</i> Harv.                                                   | Honey flower, melianthus, giant honey flower, touch-me-not (E), kruidjie-roermy-nie, heuningblom, klappers (A), Kriekiebos (KS), ubuhlungubemamba, ubutyayi (X), ibonya (Z) | Melanthaceae  | Shrub            | Leaves, roots       | Lukewarm decoction of green leaves used as wash for painful legs. Leaves used for rheumatism. Root used as snuff with rooistorm, cloves and tobacco (boertwak) for headache                                                                                                                                                                                                                                           | Nortje and van Wyk (2015)                                                                             | 1         |
| <i>Melolobium candicans</i> (E.Mey.) Eckl. & Zeyh.                                   | Wilde dagga; naeltjedorning (A)                                                                                                                                             | Fabaceae      | Herb             | Stem, leaves        | Decoction of the stem and leaves used to treat stomach problems                                                                                                                                                                                                                                                                                                                                                       | De Beer and Van Wyk (2011)                                                                            | 1         |
| <i>Mentha longifolia</i> (L.) Huds.<br>Synonyms: <i>Mentha aepycaulos</i>            | Wild mint (E), ballerja, balderjan, baldrian,t'kamma                                                                                                                        | Lamiaceae     | Herb             | Leaves              | Leaves used as compress on pains and sores. Ointment                                                                                                                                                                                                                                                                                                                                                                  | Nortje and van Wyk (2015); Van                                                                        | 5         |

| Botanical name                                                                                                                    | *Common name                                                                               | Family       | Life-form | #Part used   | Application                                                                                                                                                                                                                                           | Reference                                                                                         | Nm |
|-----------------------------------------------------------------------------------------------------------------------------------|--------------------------------------------------------------------------------------------|--------------|-----------|--------------|-------------------------------------------------------------------------------------------------------------------------------------------------------------------------------------------------------------------------------------------------------|---------------------------------------------------------------------------------------------------|----|
| Candargy, <i>Mentha brassoensis</i> (Topitz) Trautm.                                                                              | (A), Ballerja (KS), inixina, inzinziniba (X), ufuthana lomhlanga (Z)                       |              |           |              | used for painful legs. Prepared as infusion for treating headache and arthritis. Warm leaves used as a compress to treat headache and stomach pains, used for washing aching legs. Used to treat toothache, headache, ear-ache, pain and inflammation | Wyk et al. (2008); De Beer and Van Wyk (2011); Hulley and Van Wyk (2019); Thring and Weitz (2006) |    |
| <i>Mentha spicata</i> L. Synonyms: <i>Mentha aquatica</i> var. <i>crispa</i> (L.) Benth., <i>Mentha crispa</i> L.                 | Spearmint, lamb mint (E), Kruisement (KS)                                                  | Lamiaceae    | Herb      | Leaves, ns   | Infusion used for pains (inflammation) and menstrual pains. Leaf infusion is used as headache remedy                                                                                                                                                  | Nortje and van Wyk (2015); Van Wyk et al. (2008)                                                  | 2  |
| <i>Merwillia plumbea</i> (Lindl.) Speta. Synonyms: <i>Scilla natalensis</i> , <i>Scilla plumbea</i> Lindl.                        | Blue squill (E), blousalngkop (A), kherere (SS), ichitha, inguduza, ubulika (Z)            | Asparagaceae | Herb      | Bulb         | Bulb decoctions are used for sprains and fractures. Used for treating chest pain                                                                                                                                                                      | Watt and Breyer-Brandwijk (1962); Mbanjwa (2020)                                                  | 2  |
| <i>Mesembryanthemum cordifolium</i> L.f. Synonyms: <i>Aptenia cordifolia</i> , <i>Litocarpus cordifolius</i> (L.f.) L.Bolus       | Red aptenia, baby sun rose (E), brakvygie (A), Ibohlololo, Umjuluka, Uncolozzi Omncane (Z) | Aizoaceae    | Herb      | Leaves, stem | Burnt leaves and stems are applied to painful joints as anti-inflammatory                                                                                                                                                                             | Hutchings et al. (1996); Mhlongo and Van Wyk (2019)                                               | 2  |
| <i>Microglossa mespilifolia</i> (Less.) B.L. Rob. Synonyms: <i>Aster mespilifolius</i> Less., <i>Erigeron natalensis</i> Sch.Bip. | Ikhambi lesduli, Ikhambi elimhlophe, Umazambezi (Z)                                        | Asteraceae   | Herb      | ns           | Analgesic (back pains)                                                                                                                                                                                                                                | Mhlongo and Van Wyk (2019)                                                                        | 1  |
| <i>Mikania natalensis</i> DC.                                                                                                     | Mikania (E), Ihlozi, Ikhambi-lesiduli (Z)                                                  | Asteraceae   | Climber   | ns           | Analgesic (headaches)                                                                                                                                                                                                                                 | Mhlongo and Van Wyk (2019)                                                                        | 1  |
| <i>Milletia stuhlmannii</i> Taub.                                                                                                 | panga panga, partridge wood (E), panga-panga, patryshout (A), muangaila (V)                | Fabaceae     | Tree      | Roots        | Root decoction is drunk for 2 days to relieve stomachache                                                                                                                                                                                             | Arnold and Gulumian (1984)                                                                        | 1  |

| <b>Botanical name</b>                                                                                                                                  | <b>*Common name</b>                                                                                   | <b>Family</b>    | <b>Life-form</b> | <b>#Part used</b> | <b>Application</b>                                                                                                                                                                                                                                  | <b>Reference</b>                                                                                        | <b>Nm</b> |
|--------------------------------------------------------------------------------------------------------------------------------------------------------|-------------------------------------------------------------------------------------------------------|------------------|------------------|-------------------|-----------------------------------------------------------------------------------------------------------------------------------------------------------------------------------------------------------------------------------------------------|---------------------------------------------------------------------------------------------------------|-----------|
| <i>Mimusops zeyheri</i> Sond.<br>Synonyms: <i>Mimusops blantyrea</i> Engl., <i>Mimusops monroi</i> S.Moore                                             | Transvaal red milkwood (E), moepel (A), mmupudu (NS), nhlantswa (Tsonga); mubululu (V), umpushane (Z) | Sapotaceae       | Tree             | Roots             | Roots are used to treat stomachache                                                                                                                                                                                                                 | Mongalo and Makhafola (2018)                                                                            | 1         |
| <i>Muraltia spinosa</i> (L.) F.Forest & J.C.Manning (= <i>Nylandtia spinosa</i> (L.) Dumort.)                                                          | Tortoise berry (E), skilpadbessie, duinebessie, bokbessie (A), mmaba (TW)                             | Polygalaceae     | Shrub            | ns                | Used to treat stomach ailments                                                                                                                                                                                                                      | Hulley and Van Wyk (2019)                                                                               | 1         |
| <i>Musa × paradisiaca</i> L.<br>Synonyms: <i>Musa × paradisiaca</i> subsp. <i>sapientum</i> (L.) Kuntze, <i>Musa × acutibracteata</i> M.Hotta          | Muomva (V)                                                                                            | Musaceae         | Herb             | Fruits            | Fruit decoction is drunk for heart pains                                                                                                                                                                                                            | Arnold and Gulumian (1984)                                                                              | 1         |
| <i>Nemesia fruticans</i> Benth.<br>Synonyms: <i>Nemesia capensis</i> Kuntze, <i>Nemesia gracillima</i> Dinter                                          | Cape snapdragon, mauve nemesia (E), leeubekkie, maagpynblommetjie, witleeubekkie, wildeleeubekkie (A) | Scrophulariaceae | Herb             | ns                | Used to treat stomach ailments                                                                                                                                                                                                                      | Hulley and Van Wyk (2019)                                                                               | 1         |
| <i>Neorautanenia mitis</i> (A.Rich.) Verdc. Synonyms: <i>Dolichos mitis</i> A. Rich., <i>Pachyrhizus orbicularis</i> Welw. ex Baker                    | Fig-leaf trailing pea (E), blou-ertjie, wildepronkertjie (A)                                          | Fabaceae         | Herb             | Bulb              | Bulbs are used to treat foot ache                                                                                                                                                                                                                   | Mongalo and Makhafola (2018)                                                                            | 1         |
| <i>Nerium oleander</i> L. Synonyms: <i>Nerion oleandrum</i> St.-Lag., <i>Oleander indica</i> (Mill.) Medik.                                            | Oleander, Rosebay, Five-roses (E)                                                                     | Apocynaceae      | Shrub            | Leaves            | Leaves are used to treat toothache                                                                                                                                                                                                                  | Mongalo and Makhafola (2018)                                                                            | 1         |
| <i>Nicotiana glauca</i> Graham.<br>Synonyms: <i>Nicotiana glauca</i> f. <i>lateritia</i> Lillo, <i>Nicotiana glauca</i> var. <i>angustifolia</i> Comes | Tree tobacco (E), wilde twak, jantwak(boom), jan twak (A), Jantwaks (KS), Icubamfene (X)              | Solanaceae       | Shrub            | Leaves            | Warmed leaves used as compress on pains. Leaves used as plug or as wash for earache. Used for headache. Fresh leaves is applied to the head as a poultice to draw out the pain. Dried leaves are used as fumitory to get rid of headache. Used as a | Nortje and van Wyk (2015); Maroyi (2017); Van Wyk et al. (2008); Bhat (2014); Hulley and Van Wyk (2019) | 5         |

| Botanical name                                                                                                                                                                                   | *Common name                                                                                                                                                             | Family     | Life-form | #Part used | Application                                                                                  | Reference                                                      | Nm |
|--------------------------------------------------------------------------------------------------------------------------------------------------------------------------------------------------|--------------------------------------------------------------------------------------------------------------------------------------------------------------------------|------------|-----------|------------|----------------------------------------------------------------------------------------------|----------------------------------------------------------------|----|
|                                                                                                                                                                                                  |                                                                                                                                                                          |            |           |            | compress on head for headache, ear-ache, pain and inflammation                               |                                                                |    |
| <i>Ochna natalitia</i> (Meisn.) Walp.                                                                                                                                                            | Coastal- redwood, Natal plane (E), pronkrooihout, Natalrooihout (A), mbovu, isithundu (Z)                                                                                | Ochnaceae  | Tree      | Roots      | Root decoction is used for painful joints                                                    | Tshikalange et al. (2016)                                      | 1  |
| <i>Ocotea bullata</i> (Burch.) E. Meyer in Drege. Synonyms: <i>Laurus bullata</i> Burch., <i>Oreodaphne bullata</i> (Burch.) Nees                                                                | Cape stinkwood, laurel wood (E), swartstinkhout (A), Umhlungulu, Umnimbithi (X), umnugani, umnukani (Z)                                                                  | Lauraceae  | Tree      | Bark       | Snuff or smoke from the bark is inhaled to treat headaches                                   | Watt and Breyer-Brandwijk (1962); Coopoosamy and Naidoo (2012) | 2  |
| <i>Olea capensis</i> L. Synonyms: <i>Enaimon undulata</i> (Aiton) Raf., <i>Olea laurifolia</i> var. <i>concolor</i> (E.Mey.) Harv.                                                               | Small ironwood , black ironwood, buchuwood, buckutree, false ironwood (E), valsysterhout, witboekenhout (A), moraøane (NS), musiri (V), umnquma-swile (X), umsishane (Z) | Oleaceae   | Tree      | Roots      | Powdered roots is used to cover incision on swollen joints                                   | Arnold and Gulumian (1984)                                     | 1  |
| <i>Olea europaea</i> subsp. <i>cuspidata</i> (Wall. & G.Don) Cif. Synonyms: <i>Olea europaea</i> subsp. <i>africana</i> (Mill.) P.S. Green, <i>Olea chrysophylla</i> var. <i>aucheri</i> A.Chev. | Wild olive (E), Olienhoutboom (KS), motlhwane (TW), mutlhwari (V)                                                                                                        | Oleaceae   | Tree      | Leaves     | Leaf infusion used for backache. Leaves is used as a poultice for rheumatism                 | Nortje and van Wyk (2015); Hulley and Van Wyk (2019)           | 2  |
| <i>Oncosiphon piluliferum</i> (L.f.) Källersjö. Synonyms: <i>Cenocline globifera</i> K.Koch, <i>Tanacetum obtusum</i> Thunb.                                                                     | Gansogie, Karoostinkkruid, Knoppies-stinkkruid, Stinkkruid (A)                                                                                                           | Asteraceae | Herb      | Leaves     | Compress leaves on head for headache. Infusion used to treat backache, pain and inflammation | Hulley and Van Wyk (2019)                                      | 1  |
| <i>Oncosiphon suffruticosum</i> (L.) Källersjö. Synonyms: <i>Cotula tanacetifolia</i> L., <i>Pentzia tanacetifolia</i> (L.) Hutch.                                                               | Stinkingweed, Calomba daisy (E), stinkkruid, wurmkruid, wurmbos,                                                                                                         | Asteraceae | Herb      | Leaves     | Leaves used as compress on pains. Used to treat stomach problems                             | Nortje and van Wyk (2015); De Beer and Van Wyk (2011)          | 2  |

| Botanical name                                                                                                                                        | *Common name                                                                                             | Family           | Life-form | #Part used | Application                                                                                                                                                              | Reference                  | Nm |
|-------------------------------------------------------------------------------------------------------------------------------------------------------|----------------------------------------------------------------------------------------------------------|------------------|-----------|------------|--------------------------------------------------------------------------------------------------------------------------------------------------------------------------|----------------------------|----|
|                                                                                                                                                       | miskruid (A), Stinkkruid (KS)                                                                            |                  |           |            |                                                                                                                                                                          |                            |    |
| <i>Opuntia ficus-indica</i> (L.) Mill.<br>Synonyms: <i>Cactus ficus-indica</i> L., <i>Opuntia megacantha</i> Salm-Dyck                                | prickly pear (E), turksvy (A)                                                                            | Cactaceae        | Shrub     | Leavees    | Compress on knee for pain and on back for backache                                                                                                                       | Hulley and Van Wyk (2019)  | 1  |
| <i>Osmitopsis asteriscoides</i> Less.<br>Synonyms: <i>Leucanthemum asteriscoides</i> (L.) Kuntze, <i>Osmitopsis asteriscoides</i> Cass.               | Swamp daisy, mountain daisy, bellis (E), bels, belskruie, belsbos, belsebos, belsbossie, belsebossie (A) | Asteraceae       | Shrub     | Leaves     | Used for body pain                                                                                                                                                       | Philander (2011)           | 1  |
| <i>Osteospermum calendulaceum</i> L.f. Synonyms: <i>Calendula parviflora</i> Thunb., <i>Oligocarpus calendulaceus</i> (L.f.) Less.                    | Boegobos, Boegobossie, genesbos(sie) (A)                                                                 | Asteraceae       | Herb      | Leaves     | Infusions used for pain and inflammation. Used for stomach ailments                                                                                                      | Hulley and Van Wyk (2019)  | 1  |
| <i>Osteospermum herbaceum</i> L.f.<br>Synonym: <i>Osteospermum zeyheri</i> Spreng. ex DC.                                                             | Stinktontel (A)                                                                                          | Asteraceae       | Herb      | Leaves     | The leaf sap is mixed with powdered tea (black tea) and apply to the mouth/gum for treating toothache                                                                    | Van Wyk et al. (2008)      | 1  |
| <i>Otholobium arborescens</i> C.H. Stirt.                                                                                                             | Renosterveld Hook-leaved Pea (E), Renosterveld-vlieëkeurtjie (A)                                         | Fabaceae         | Shrub     | Twigs      | Leafy twigs used for treating backache and headache                                                                                                                      | De Beer and Van Wyk (2011) | 1  |
| <i>Ozoroa paniculosa</i> (Sond.) R.Fern. & A.Fern. Synonyms: <i>Heeria paniculosa</i> (Sond.) Kuntze, <i>Rhus paniculosa</i> Sond.                    | common resin tree, bushveld ozoroa (E), gewone harpuisboom (A), isifice (Z), monoko (NS), mudumbula (V)  | Anacardiaceae    | Tree      | Bark       | The bark can be ground to a fine powder which is used to treat stomach pains                                                                                             | Mogale et al. (2019)       | 1  |
| <i>Parinari curatellifolia</i> Planch. ex Benth. Synonyms: <i>Ferolia curatellifolia</i> (Planch. ex Benth.) Kuntze, <i>Parinari gardineri</i> Hemsl. | mobola-plum, cork tree, hissing tree (E), grysappel, bosappel (A), mmola (NS), mobola (TW), muvhula (V)  | Chrysobalanaceae | Tree      | Bark       | Bark decoction is used to rinse oral cavity to relieve toothache. Bark decoction is used as nose and ear drops to relieve toothache die to mandibular and maxillar pains | Arnold and Gulumian (1984) | 1  |

| <b>Botanical name</b>                                                                                                                                                         | <b>*Common name</b>                                                                                                               | <b>Family</b>  | <b>Life-form</b> | <b>#Part used</b> | <b>Application</b>                                                                                       | <b>Reference</b>                                 | <b>Nm</b> |
|-------------------------------------------------------------------------------------------------------------------------------------------------------------------------------|-----------------------------------------------------------------------------------------------------------------------------------|----------------|------------------|-------------------|----------------------------------------------------------------------------------------------------------|--------------------------------------------------|-----------|
| <i>Passiflora suberosa</i> L.<br>Synonyms: <i>Anthactinia walkeri</i> M.Roem., <i>Cieca hederacea</i> M.Roem.                                                                 | Unyawo lenkukhu,<br>Inhlanhla emhlophe (Z)                                                                                        | Passifloraceae | Climber          | ns                | Analgesic (lower back pains)                                                                             | Mhlongo and Van Wyk (2019)                       | 1         |
| <i>Pavetta graciliflora</i> Wall. ex Ridl.                                                                                                                                    | Ncolovoti (Xitsonga)                                                                                                              | Rubiaceae      | Herb             | Root              | Root decoction is used for treating painful feet                                                         | Tshikalange et al. (2016)                        | 1         |
| <i>Pegolettia baccharidifolia</i> Less.<br>Synonyms: <i>Carphopappus baccharidifolius</i> (Less.) Sch.Bip., <i>Iphiona baccharidifolia</i> (Less.) Benth. & Hook.f. ex Dinter | Heuningbos, ghwarrieson, heuningdou (A)                                                                                           | Asteraceae     | Herb             | ns                | For inflammation (on parts of the body or chest). For treating headache, backache, pain and inflammation | Van Wyk et al. (2008); Hulley and Van Wyk (2019) | 2         |
| <i>Pelargonium grossularioides</i> (L.) L'Hér. Synonym: <i>Geranium grossularioides</i> L.                                                                                    | gooseberry-leaved pelargonium (E), rooirabas, rooirabassam, roostingelhoutbas (A)                                                 | Geraniaceae    | Herb             | ns                | For treating backache and stomachache                                                                    | Hulley and Van Wyk (2019)                        | 1         |
| <i>Pelargonium hypoleucum</i> Turcz.<br>Synonym: <i>Pelargonium harveyanum</i> R.Knuth                                                                                        | Rooirabas (KS)                                                                                                                    | Geraniaceae    | Herb             | Roots             | Root decoction used for backache and menstrual pains                                                     | Nortje and van Wyk (2015)                        | 1         |
| <i>Pelargonium triste</i> (L.) L'Hér.<br>Synonyms: <i>Geranospermum triste</i> (L.) Kuntze, <i>Pelargonium flavum</i> L. Ait.                                                 | Night-scented pelargonium, Sad geranium (E), Kaneelbol (A)                                                                        | Geraniaceae    | Herb             | Corms, roots      | For treatment of pains                                                                                   | Mintsa Mi Nzue (2009)                            | 1         |
| <i>Pelargonium peltatum</i> (L.) L'Hér. Synonyms: <i>Pelargonium lateripes</i> L'Hér., <i>Dibrachya clypeata</i> Eckl. & Zeyh.                                                | ivy-leaved pelargonium, ivy pelargonium, wild sorrel, cascading pelargonium (E), kolsuring, wildemalva (A), umnewana, ityholo (X) | Geraniaceae    | Herb             | ns                | Used for the treatment of ear-ache                                                                       | Hulley and Van Wyk (2019)                        | 1         |
| <i>Pelargonium ramosissimum</i> Willd.                                                                                                                                        | Dassieboegoe, Dassiebuchu, dassiebos (A)                                                                                          | Geraniaceae    | Shrub            | Leaves, stem      | Infusion of leafy stem used to treat backache and stomach problems                                       | De Beer and Van Wyk (2011)                       | 1         |

| <b>Botanical name</b>                                                                                                                                                            | <b>*Common name</b>                                                                                                          | <b>Family</b> | <b>Life-form</b> | <b>#Part used</b> | <b>Application</b>                                                                                                                                                                                                                                                                                                                                          | <b>Reference</b>                                                                                                                                               | <b>Nm</b> |
|----------------------------------------------------------------------------------------------------------------------------------------------------------------------------------|------------------------------------------------------------------------------------------------------------------------------|---------------|------------------|-------------------|-------------------------------------------------------------------------------------------------------------------------------------------------------------------------------------------------------------------------------------------------------------------------------------------------------------------------------------------------------------|----------------------------------------------------------------------------------------------------------------------------------------------------------------|-----------|
| <i>Pelargonium zonale</i> (L.) L'Hér. ex Aiton. Synonyms: <i>Ciconium clarum</i> Hoffmanns., <i>Ciconium stenopetalum</i> Hoffmanns.                                             | horse-shoe pelargonium (E), wildemalva, bergmalva (A)                                                                        | Geraniaceae   | Shrub            | Leaves            | Fresh leaves are used as ear plugs for earache. For treating toothache and ear-ache                                                                                                                                                                                                                                                                         | Van Wyk et al. (2008); Hulley and Van Wyk (2019)                                                                                                               | 2         |
| <i>Peltophorum africanum</i> Sond. Synonym: <i>Brasilettia africana</i>                                                                                                          | Weeping wattle, Natal wattle (E), huilboom, kiaatboom (A), Mosêhla, Mosese (NS), Mosêtlha (TW), umsehle, Isikhabamkhombe (Z) | Fabaceae      | Tree             | Roots, bark       | Roots and bark are used for backache. Bark is also used for abdominal pain while leaves are used for toothache and abdominal pain. Root decoction is used for body pain                                                                                                                                                                                     | Pooley (1993); Mabogo (1990); Watt and Breyer-Brandwijk (1962); Mogale et al. (2019); Tshikalange et al. (2016)                                                | 5         |
| <i>Pentanisia prunelloides</i> subsp. <i>latifolia</i> (Hochst.) Verdc. Synonyms: <i>Pentanisia variabilis</i> Harv. var. <i>latifolia</i> , <i>Declieuxia latifolia</i> Hochst. | Wild verbena, broad-leaved Pentanisia (E), sooibrandbossie (A), isigcikamlilo (X), Icishamlilo, Icishamlilo elikhulu (Z)     | Rubiaceae     | Herb             | Leaves, roots     | Decoctions are sprinkled on painful parts for treating rheumatism. Pounded roots are applied to burns and used in poultices for inflammation and swollen joints. Leaf poultices or hot root decoctions are applied to painful swellings, rheumatic parts, sprains and sores. Analgesic (general body pains). Root decoction is used for treating rheumatism | Bryant (1966); Gerstner (1941); Hulme (1954); Watt and Breyer-Brandwijk (1962); Mhlongo and Van Wyk (2019); Bhat (2014); Mintsu Mi Nzue (2009); Mbanjwa (2020) | 8         |
| <i>Pentzia dentata</i> (L.) Kuntze. Synonyms: <i>Athanasia flabellifera</i> Salisb., <i>Pentzia flabelliformis</i> Willd.                                                        | greater skaapkaroo, duck's-foot skaapkaroo (E), grootskaapkaroo, eendepootkaroo (A)                                          | Asteraceae    | Shrub            |                   | Used for relieving menstration pains                                                                                                                                                                                                                                                                                                                        | Hulley and Van Wyk (2019)                                                                                                                                      | 1         |
| <i>Pentzia incana</i> (Thunb.) Kuntze. Synonyms: <i>Chrysanthemum incanum</i> Thunb., <i>Pentzia virgata</i> Less.                                                               | Anchor Karoo, Common Karro (E), Ankerkaroo, Gansie, Alsbossie, Rooikarobos (A), Mohantsoana (SS)                             | Asteraceae    | Shrub            | Leaves, twigs, ns | For stomachache. Leaves are chewed to treat stomach cramps and to treat general pain. Twigs are chewed to extract juices for treating                                                                                                                                                                                                                       | Van Wyk et al. (2008); De Beer and Van Wyk (2011); Hulley                                                                                                      | 3         |

| Botanical name                                                                                                                                                                 | *Common name                                                                                                                               | Family         | Life-form | #Part used    | Application                                                                                                                                                                                        | Reference                                                              | Nm |
|--------------------------------------------------------------------------------------------------------------------------------------------------------------------------------|--------------------------------------------------------------------------------------------------------------------------------------------|----------------|-----------|---------------|----------------------------------------------------------------------------------------------------------------------------------------------------------------------------------------------------|------------------------------------------------------------------------|----|
|                                                                                                                                                                                |                                                                                                                                            |                |           |               | stomachache, backache, pain and inflammation                                                                                                                                                       | and Van Wyk (2019)                                                     |    |
| <i>Petroselinum crispum</i> (Mill.) Fuss. Synonyms: <i>Apium petroselinum</i> var. <i>angustifolium</i> Hayne, <i>Wydleria portoricensis</i> DC.                               | Parsley (E), pietersielie (A)                                                                                                              | Apiaceae       | Herb      | Leaves        | Taken as an infusion made from a handful of leaves taken when needed for treating arthritis and rheumatism                                                                                         | Thring and Weitz (2006)                                                | 1  |
| <i>Phoenix reclinata</i> Jacq. Synonyms: <i>Fulchironia senegalensis</i> Lesch., <i>Phoenix dybowskii</i> A.Chev.                                                              | Wild date palm (E), Isundu, Usundu (Z)                                                                                                     | Arecaceae      | Tree      | ns            | Analgesic (sharp internal body pains, internal side pains, toothache)                                                                                                                              | Mhlongo and Van Wyk (2019)                                             | 1  |
| <i>Phragmites australis</i> (Cav.) Trin. ex Steud. Synonyms: <i>Phragmites communis</i> Trin., <i>Remirea diffusa</i> Sieber ex Steud.                                         | Common reed (E)                                                                                                                            | Poaceae        | Grass     | Seeds         | Used to cover incisions made on swollen joints after the application of <i>Olea capensis</i> L.                                                                                                    | Arnold and Gulumian (1984)                                             | 1  |
| <i>Phytolacca americana</i> L. Synonyms: <i>Phytolacca americana</i> var. <i>americana</i> , <i>Phytolacca decandra</i> L.                                                     | Cancer jalap/root, inkberry, poke berry/root/weed (E), karmosynbos (A), umnanja, umnyanja (Z)                                              | Phytolaccaceae | Herb      | Fruit, roots  | Fruit and roots are used as anti-rheumatics, anti-inflammatory for pain                                                                                                                            | Hutchings et al. (1996)                                                | 1  |
| <i>Pittosporum viridiflorum</i> Sims. Synonyms: <i>Pittosporum abyssinicum</i> , <i>Pittosporum antunesii</i> , <i>Pittosporum commutatum</i> , <i>Pittosporum floribundum</i> | Cheesewood (E), bosbeukenhout, Kasuur (A), Kgalagangwe (NS), Mosetlela (SS), Mutanzwakhanelo (V), umkhwenkwe (X), umfusamvu, umkwenkwe (Z) | Pittosporaceae | Shrub     | Bark, roots   | Bark decoctions are also taken for pains in the back as emetics or enemas for stomach troubles particularly those to ease pain. Root infusions are taken for chest pains. Taken for abdominal pain | Watt and Breyer-Brandwijk (1962); Maroyi (2017); Van Wyk et al. (2008) | 3  |
| <i>Ptaeroxylon obliquum</i> (Thunb.) Radlk. Synonyms: <i>Ptaeroxylon utile</i> Eckl. & Zeyh, <i>Rhus obliqua</i> Thunb.                                                        | Sneezewood (E), umThathi (X), umthathe (Z)                                                                                                 | Rutaceae       | Tree      | Bark          | Treating headache                                                                                                                                                                                  | Philander (2011)                                                       | 1  |
| <i>Plantago lanceolata</i> L. Synonyms: <i>Arnoglossum</i>                                                                                                                     | Buckhorn Plantain, English Plantain, German Psyllium, Lamb's Tongue (E),                                                                   | Plantaginaceae | Herb      | Leaves, roots | Small leaves are inserted in the nostrils to heal headache. Root juice is used to treat                                                                                                            | Bhat (2014); Hulley and Van Wyk (2019)                                 | 2  |



| Botanical name                                                                                                                    | *Common name                                                                                                                                         | Family         | Life-form | #Part used    | Application                                                                                                                         | Reference                                                            | Nm |
|-----------------------------------------------------------------------------------------------------------------------------------|------------------------------------------------------------------------------------------------------------------------------------------------------|----------------|-----------|---------------|-------------------------------------------------------------------------------------------------------------------------------------|----------------------------------------------------------------------|----|
| <i>lanceolatum</i> (L.) Gray, <i>Plantago sinuata</i> Lam.                                                                        | Msalweebree, Msalweegbree (A), Setlabocha, Bolila-nyana (SS), Indlebe-kathekwane Encane (Z)                                                          |                |           |               | ear-ache. Leaves are used as compress on aching feet. Infusions are used for stomach ailments                                       |                                                                      |    |
| <i>Platycarpha glomerata</i> (Thunb.) Less. Synonyms: <i>Cynara glomerata</i> Thunb., <i>Stobaea glomerata</i> (Thunb.) Spreng.   | Imbozisa, Imbozisa encane, Isiphahluka, Ubani, Ubani olukhulu, Ukhula, Umabopha, Umbola, Umkhwibi ompofu (Z)                                         | Asteraceae     | Herb      | Roots, ns     | Internal side pain in children, chest pain and musculo-skeletal (inflammation). Yellow sap is used for cleaning ear or ear-ache     | Mhlongo and Van Wyk (2019); Philander (2011); Mbanjwa (2020)         | 3  |
| <i>Plumbago auriculata</i> Lam. Synonyms: <i>Plumbagidium auriculatum</i> (Lam.) Spach, <i>Plumbago capensis</i>                  | Cape leadwort, plumbago (E), syselbos (A), Umabophe, umatshintshine, (X), umasheleshele, Ubani, umaswelisweli (Z)                                    | Plumbaginaceae | Shrub     | Roots, leaves | Powdered roots or dried leaves are taken as snuff to relieve headaches. Analgesic (sharp internal body pains)                       | Gerstner (1941); Hutchings et al. (1996); Mhlongo and Van Wyk (2019) | 3  |
| <i>Portulaca oleracea</i> L. Synonyms: <i>Portulaca consanguinea</i> Schltldl., <i>Portulaca sylvestris</i> Montandon             | Common Purslane (E), porstelein, reslein, oumisbredie (A)                                                                                            | Portulacaceae  | Herb      | ns            | Used to treat backache                                                                                                              | Hulley and Van Wyk (2019)                                            | 1  |
| <i>Portulacaria afra</i> Jacq.                                                                                                    | Porkbush, Elephant's Food (E), Spekboom. Olifantskos, spekboomblare (A), iNtelezi, isiDondwane, isAmbilane, iNdibili, isiCococo (Z), iGqwanitsha (X) | Portulacaceae  | Shrub     | ns            | Eaten as treatment for stomachache, ear-ache, pain and inflammation                                                                 | Hulley and Van Wyk (2019)                                            | 1  |
| <i>Protorhus longifolia</i> (Bernh.) Engl. Synonyms: <i>Anaphrenium longifolium</i> Bernh., <i>Rhus longifolia</i> (Bernh.) Sond. | Purple currant, red beech, red cape beech (E), Harpuisboom (A), Ikhubalo, Isifuce(X), Mutumusolde (V), Isifice, Isifico-sehlathi, Isifuze (Z),       | Anacardiaceae  | Tree      | Bark          | Bark decoctions are taken in 200 ml doses as emetics to relieve heartburn and bleeding from the stomach. Smoked to relieve headache | Pujol (1990); Mbanjwa (2020)                                         | 2  |

| <b>Botanical name</b>                                                                                                                                                              | <b>*Common name</b>                                                                                                                                                          | <b>Family</b>  | <b>Life-form</b> | <b>#Part used</b> | <b>Application</b>                                                                                 | <b>Reference</b>                                        | <b>Nm</b> |
|------------------------------------------------------------------------------------------------------------------------------------------------------------------------------------|------------------------------------------------------------------------------------------------------------------------------------------------------------------------------|----------------|------------------|-------------------|----------------------------------------------------------------------------------------------------|---------------------------------------------------------|-----------|
| <i>Prunus africana</i> (Hook.f.) Kalkman. Synonym: <i>Pygeum africanum</i> Hook. f.                                                                                                | African almond tree, bitter almond (E), Bitteramandel, Bitteramandelboom (A), Mogohloro (NS), Umkhakhase, Itywina-elikhul (X), Mulala-maanga (V), umdumizula, umkhakhazi (Z) | Rosaceae       | Tree             | Bark              | Bark is used to treat intercostal pain and vhest pain                                              | Pujol (1990); Coopoosamy and Naidoo (2012)              | 2         |
| <i>Prunus persica</i> (L.) Batsch. Synonyms: <i>Persica vulgaris</i> var. <i>compressa</i> Loudon, <i>Prunus persica</i> f. <i>scleropersica</i> (Rchb.) Voss                      | Umpetshisi, Ipentshisi (Z)                                                                                                                                                   | Rosaceae       | Tree             | ns                | For relieving menstrual pain                                                                       | Mbanjwa (2020)                                          | 1         |
| <i>Pseudophyllanthus ovalis</i> (E.Mey. ex Sond.) Voronts. & Petra Hoffm. Synonyms: <i>Andrachne ovalis</i> (E.Mey. ex Sond.) Müll.Arg., <i>Phyllanthus ovalis</i> E.Mey. ex Sond. | False Lightning Bush (E), Valsbliksembos (A), umgqata (X), umbheza (Z)                                                                                                       | Phyllanthaceae | Shrub            | Roots             | For body pains and aches                                                                           | Philander (2011)                                        | 1         |
| <i>Psiadia punctulata</i> (DC.) Vatke. Synonyms: <i>Baccharis resiniflua</i> Steud. & Hochst. ex DC., <i>Psiadia arabica</i> Jaub. & Spach                                         | Sticky Psiadia (E), Blink Stefaans (A)                                                                                                                                       | Asteraceae     | Shrub            | ns                | Plant is used to rinse painful eyes                                                                | Mogale et al. (2019)                                    | 1         |
| <i>Psidium guajava</i> L. Synonyms: <i>Guajava pumila</i> (Vahl) Kuntze, <i>Syzygium ellipticum</i> K.Schum. & Lauterb.                                                            | Guava (E)                                                                                                                                                                    | Myrtaceae      | Shrub            | Roots             | Roots are used for stomachache. Leaf infusion is used to treat arthritis                           | Mongalo and Makhafola (2018); Hulley and Van Wyk (2019) | 2         |
| <i>Ptaeroxylon obliquum</i> (Thunb.) Radlk. Synonyms: <i>Ptaeroxylon utile</i> Eckl. & Zeyh, <i>Rhus obliqua</i> Thunb.                                                            | Sneezewood, stinkhout (E), Nieshout (A), Mulari, Munari, Munukha-vhaloi (V), Umthathi, Umthote                                                                               | Rutaceae       | Tree             | Bark              | Bark infusions are use against rheumatism and arthritis. Powdered bark is use to relieve headaches | Pujol (1990); Watt and Breyer-Brandwijk (1962); Mhlongo | 3         |

| Botanical name                                                                                                                                      | *Common name                                                                                                                                                                                       | Family      | Life-form | #Part used    | Application                                                                                                                                                                                                                              | Reference                                       | Nm |
|-----------------------------------------------------------------------------------------------------------------------------------------------------|----------------------------------------------------------------------------------------------------------------------------------------------------------------------------------------------------|-------------|-----------|---------------|------------------------------------------------------------------------------------------------------------------------------------------------------------------------------------------------------------------------------------------|-------------------------------------------------|----|
|                                                                                                                                                     | (X), Ithatha, Umthathi, Umzane, Uthathi (Z)                                                                                                                                                        |             |           |               |                                                                                                                                                                                                                                          | and Van Wyk (2019)                              |    |
| <i>Pterocarpus angolensis</i> DC.<br>Synonyms: <i>Pterocarpus bussei</i> Harms, <i>Pterocarpus dekindtianus</i> var. <i>latifoliolatus</i> De Wild. | Bloodwood, paddle-wood, sealing-wax tree, wild teak, Transvaal teak (E), bloedhout, kajatenhout, lakhout, wilde-kiaat (A), morôtô (NS), mokwa, morotômadi (TW); mutondo (V), umvangazi, umbilo (Z) | Fabaceae    | Tree      | Roots         | Roots are macerated and taken for headache                                                                                                                                                                                               | Arnold and Gulumian (1984)                      | 1  |
| <i>Pterodiscus kellerianus</i> Schinz                                                                                                               | Moyane (NS)                                                                                                                                                                                        | Pedaliaceae | Herb      | Roots         | Fleshy roots are used to treat stomach aches in new-born babies                                                                                                                                                                          | Mongalo and Makhafola (2018)                    | 1  |
| <i>Pteronia camphorata</i> (L.) L.<br>Synonyms: <i>Pteronia aspera</i> Thunb., <i>Pteronia laricina</i> Houtt. ex DC.                               | sand gumbush (E), sandgombos (A), Wakkerbos (KS)                                                                                                                                                   | Asteraceae  | Shrub     | Leaves, twigs | Powdered leaves used medicinally as snuff (mixed with other herbs). Leaves and twigs infused in milk or water used to alleviate toothache. Dry powdered leaves applied on cotton wool to relief of earache. infusion used for rheumatism | Nortje and van Wyk (2015)                       | 1  |
| <i>Pteronia cinerea</i> L.f. Synonym: <i>Pteronia canescens</i> DC.                                                                                 | Boegoe (KS)                                                                                                                                                                                        | Asteraceae  | Shrub     | Leaves        | leaf infusion used for low back pain                                                                                                                                                                                                     | Nortje and van Wyk (2015)                       | 1  |
| <i>Pteronia incana</i> (Burm.) DC.<br>Synonyms: <i>Athanasia rigida</i> Scop., <i>Pteronia xantholepis</i> DC.                                      | skieterbosa, keurtjebosa, kraakbos (A)                                                                                                                                                             | Asteraceae  | Herb      | ns            | Infusion is used for backache and stomachache                                                                                                                                                                                            | Hulley and Van Wyk (2019)                       | 1  |
| <i>Punica granatum</i> L. Synonyms: <i>Punica nana</i> L., <i>Punica spinosa</i> Lam.                                                               | Granaat, grinaat, wildegranaatbos (A), garemate (SS)                                                                                                                                               | Lythraceae  | Shrub     | Fruits        | Used for treating stomachache. The skin of the fruit is used to treat stomach pains                                                                                                                                                      | Hulley and Van Wyk (2019); Mogale et al. (2019) | 2  |

| <b>Botanical name</b>                                                                                                            | <b>*Common name</b>                                                                                                                                                                                             | <b>Family</b> | <b>Life-form</b> | <b>#Part used</b>             | <b>Application</b>                                                                                     | <b>Reference</b>                                                | <b>Nm</b> |
|----------------------------------------------------------------------------------------------------------------------------------|-----------------------------------------------------------------------------------------------------------------------------------------------------------------------------------------------------------------|---------------|------------------|-------------------------------|--------------------------------------------------------------------------------------------------------|-----------------------------------------------------------------|-----------|
| <i>Radyera urens</i> (L.f.) Bullock.<br>Synonyms: <i>Allenia urena</i> (L.f.)<br>E.Phillips, <i>Hibiscus urens</i> L. f.         | Jeukblom, Jigblom,<br>Pampoebossie (A),<br>Wildepampoen (KS)                                                                                                                                                    | Malvaceae     | Herb             | Leaves                        | leaves as compress on pains                                                                            | Nortje and van<br>Wyk (2015)                                    | 1         |
| <i>Rapanea melanophloeos</i> (L.)<br>Mez. Synonyms: <i>Heeria<br/>melanophloeos</i> (L.) Meisn.,<br><i>Myrsine melanophloeos</i> | Cape beech tree (E),<br>boekenhout,<br>rooiboekenhout (A),<br>Isiqwane Sehlati (X),<br>Mogônô (NS), Tshididiri,<br>Tshikonwa (V), Isihluthi-<br>wentaba, ikhubalwane (Z)                                        | Primulaceae   | Tree             | Bark                          | Bark is used for stomach and<br>muscular pain. Ground bark<br>decoctions are taken for<br>stomach ache | Gerstner (1941);<br>Hutchings et al.<br>(1996); Pujol<br>(1990) | 3         |
| <i>Raphionacme procumbens</i><br>Schltr.                                                                                         | Dema (Xitsonga)                                                                                                                                                                                                 | Apocynaceae   | Herb             | Bulb                          | Bulb is mixed with milk and<br>used for painful waist                                                  | Tshikalange et al.<br>(2016)                                    | 1         |
| <i>Rauvolfia caffra</i> Sond.<br>Synonyms: <i>Rauvolfia inebrians</i><br>K.Schum., <i>Rauvolfia oxyphylla</i><br>Stapf           | quinine tree (E), kinaboom<br>(A), umJelo, umThundisa<br>(X), Umhlambamanzi,<br>umKhadluvungu (Z)                                                                                                               | Apocynaceae   | Tree             | ns                            | Analgesic (toothache)                                                                                  | Mhlongo and Van<br>Wyk (2019)                                   | 1         |
| <i>Rhoicissus digitata</i> (L. f.) Gilg<br>& M. Brandt. Synonym: <i>Rhus<br/>digitatum</i> L. f.                                 | Baboon grape (E),<br>bobbejaandruif (A),<br>isaQoni, isaQoni esincini,<br>Uchithibhunga (X),<br>isiNwazi, umThwazi,<br>umNangwazi,<br>umPhambane (Z);                                                           | Vitaceae      | Climber          | Roots                         | For treating headache                                                                                  | Maroyi (2017)                                                   | 1         |
| <i>Rhoicissus tomentosa</i> (Lam.)<br>Wild & R.B. Drumm. Synonym:<br><i>Cissus tomentosa</i> Lam.                                | Wild grape, bush grape,<br>African grape, forest Grape,<br>monkey rope (E), Bosdruif,<br>Wildedruif, Bobbejaantou<br>(A), isaQoni, iDiliya (X),<br>Makhulu-wa-khundwi (V),<br>Isende lengulube, Isinwazi<br>(Z) | Vitaceae      | Climber          | Leaves,<br>roots, stem,<br>ns | Analgesic (chronic<br>headache). Remedy for pains                                                      | Mhlongo and Van<br>Wyk (2019);<br>Mintsa Mi Nzue<br>(2009)      | 2         |
| <i>Rhoicissus tridentata</i> (L.f.) Wild<br>& R.B.Drumm. Synonyms:<br><i>Rhus tridentata</i> L.f.,                               | Northern Bushman's grape,<br>bitter grape, wild grape (E),<br>noordelike boesmansdruif,                                                                                                                         | Vitaceae      | Tree             | Roots                         | Powdered roots is added to<br>porridge to relieve stomach<br>pain in children                          | Arnold and<br>Gulumian (1984)                                   | 1         |

| Botanical name                                                                                                                                          | *Common name                                                                                                                             | Family        | Life-form | #Part used            | Application                                                                                                                                                                                                                                                                                                                                                                                                                                                                                                                     | Reference                                                                                                                                                                                                                       | Nm |
|---------------------------------------------------------------------------------------------------------------------------------------------------------|------------------------------------------------------------------------------------------------------------------------------------------|---------------|-----------|-----------------------|---------------------------------------------------------------------------------------------------------------------------------------------------------------------------------------------------------------------------------------------------------------------------------------------------------------------------------------------------------------------------------------------------------------------------------------------------------------------------------------------------------------------------------|---------------------------------------------------------------------------------------------------------------------------------------------------------------------------------------------------------------------------------|----|
| <i>Toxicodendron tridentatum</i> (L.f.) Kuntze                                                                                                          | bitterdruif, droog-my-keel, wildedruif (A), isaqoni, umnxeba, ulatile, uchithibhunga (X), murumbula-mbudzana (V), isinwazi, umthwazi (Z) |               |           |                       |                                                                                                                                                                                                                                                                                                                                                                                                                                                                                                                                 |                                                                                                                                                                                                                                 |    |
| <i>Rhus chirindensis</i> Bak. f.<br>Synonyms: <i>Searsia chirindensis</i> , <i>Rhus chirendensis</i> A. Fern. & R. Fern., <i>Rhus legatii</i> Schönland | Red currant (E), Bostaai-bos (A), umhlakothi (X), muvhadela-phanga (V), Inhlakoshane, Inyazangoma, Inyazangoma elimhlophe (Z)            | Anacardiaceae | Tree      | Bark                  | Bark is used to strengthen the body and for rheumatism. Analgesic ( <i>isincindo</i> for pains, sharp internal body pains)                                                                                                                                                                                                                                                                                                                                                                                                      | Pujol (1990); Mhlongo and Van Wyk (2019)                                                                                                                                                                                        | 2  |
| <i>Ricinus communis</i> L. Synonyms: <i>Ricinus africanus</i> Mill., <i>Ricinus communis</i> var. <i>communis</i>                                       | Castor bean (E), kasterolie (boom) (A), Olieboom, kasterolie (KS), Mupfure (V), Umkakuva, umhlakuva (X), Uhlakuva, Umhlakuva (Z)         | Euphorbiaceae | Shrub     | Leaves, seeds, fruits | Analgesic (toothache), musculo-skeletal (inflammation). Oil from ground seeds used as ointment and leaves as compress on pains and rheumatism. Leaves compress on the cheek for toothache. Treating stomachache. Leaves are heated and placed on painful knees/joints. Oil squeezed from the fruits into the ear to relieve ear-ache. Fresh leaves are ground and mixed with water and about 50 ml is given orally to treat stomachache. Compress leaves for headache, pain and inflammation as well as sprains. Warm leaves is | Mhlongo and Van Wyk (2019); Nortje and van Wyk (2015); Maroyi (2017); De Beer and Van Wyk (2011); Arnold and Gulumian (1984); Bhat (2014); Hulley and Van Wyk (2019), Philander (2011); Thring and Weitz (2006); Mbanjwa (2020) | 10 |

| Botanical name                                                                                                                 | *Common name                                                                                                                         | Family         | Life-form | #Part used | Application                                                                                                                                                                                       | Reference                                                               | Nm |
|--------------------------------------------------------------------------------------------------------------------------------|--------------------------------------------------------------------------------------------------------------------------------------|----------------|-----------|------------|---------------------------------------------------------------------------------------------------------------------------------------------------------------------------------------------------|-------------------------------------------------------------------------|----|
|                                                                                                                                |                                                                                                                                      |                |           |            | wrapped around a child for stomachache                                                                                                                                                            |                                                                         |    |
| <i>Roepera morgsana</i> (L.) Beier & Thulin. Synonym: <i>Zygophyllum morgsana</i> L.                                           | Leeutjies (A)                                                                                                                        | Zygophyllaceae | Shrub     | Roots      | Roots are used for treating backache                                                                                                                                                              | Hulley and Van Wyk (2019)                                               | 1  |
| <i>Rosmarinus officinalis</i> L.<br>Synonyms: <i>Rosmarinus laxiflorus</i> Noë, <i>Rosmarinus rigidus</i> Jord. & Fourr.       | Rosemary                                                                                                                             | Lamiaceae      | Shrub     | Leaves     | For treating headache                                                                                                                                                                             | Philander (2011)                                                        | 1  |
| <i>Rosenia humilis</i> (Less.) K.Bremer. Synonyms: <i>Nestlera conferta</i> DC., <i>Rosenia nestleroides</i> Compton           | Hartebeeskaroo, Perdekaroo (A)                                                                                                       | Asteraceae     | Shrub     | ns         | For relieving labour pains                                                                                                                                                                        | Hulley and Van Wyk (2019)                                               | 1  |
| <i>Rothmannia capensis</i> Thunb.<br>Synonyms: <i>Gardenia capensis</i> (Thunb.) Druce, <i>Gardenia rothmannia</i> L.f.        | Wild gardenia, common Rothmannia (E), iBolo (X), wildekatjiepiering (A), modulatschwene (NS), mukubudu (V), umPhazane-mkhlu (Z)      | Rubiaceae      | Tree      | Roots      | Powdered roots rubbed for scarification of rheumatism                                                                                                                                             | Pooley (1993); Watt and Breyer-Brandwijk (1962)                         | 2  |
| <i>Rubus ludwigii</i> Eckl. & Zeyh.<br>Synonyms: <i>Rubus rhodacantha</i> E.Mey., <i>Rubus ludwigii</i> subsp. <i>ludwigii</i> | Silver bramble, Wild Raspberry (E), Braam, Braambos (A), Monokometsi (SS), Itshalo, Imencemence, Unomhloshane (Z)                    | Rosaceae       | Shrub     | Roots      | Powdered roots are taken in water to ease stomach ache. The Sotho administer decoctions for acute pain during illnesses                                                                           | Watt and Breyer-Brandwijk (1962); Hutchings et al. (1996)               | 2  |
| <i>Rubus pinnatus</i> Willd.<br>Synonyms: <i>Rubus kingaensis</i> Engl., <i>Rubus pinnatus</i> var. <i>defensus</i> Gust.      | South African blackberry (bramble or Raspberry), Capebramble (E), braambos braamboswortel (A), Iqunube (X), Ijingijolo, Mfongosi (Z) | Rosaceae       | Shrub     | Roots      | Root decoctions are taken for various respiratory ailments including pain in the chest. Roots are used for toothache either as warm water gargles or ground and inserted directly into the cavity | Hutchings et al. (1996); Pujol (1990); Watt and Breyer-Brandwijk (1962) | 3  |
| <i>Rubus rigidus</i> Sm. Synonyms: <i>Dyctisperma rigidus</i> (Sm.) Raf.                                                       | White bramble (E), braambossie, braambos                                                                                             | Rosaceae       | Shrub     | Roots      | Root decoctions are taken as gargles for toothache. Root                                                                                                                                          | Hutchings et al. (1996); Watt and                                       | 4  |

| <b>Botanical name</b>                                                                                                                       | <b>*Common name</b>                                                                         | <b>Family</b> | <b>Life-form</b> | <b>#Part used</b>               | <b>Application</b>                                                                                                                                                                                                             | <b>Reference</b>                                                                                                                                                                                        | <b>Nm</b> |
|---------------------------------------------------------------------------------------------------------------------------------------------|---------------------------------------------------------------------------------------------|---------------|------------------|---------------------------------|--------------------------------------------------------------------------------------------------------------------------------------------------------------------------------------------------------------------------------|---------------------------------------------------------------------------------------------------------------------------------------------------------------------------------------------------------|-----------|
| ex B.D.Jacks., <i>Rubus inedulis</i><br>Rolfe                                                                                               | (A), Umgcunube (X),<br>ijingijolo, Amajikijolo,<br>Amabhimbi (Z)                            |               |                  |                                 | decoctions for acute pain<br>during illnesses. Analgesic<br>(toothache, sharp internal<br>body pains)                                                                                                                          | Breyer-Brandwijk<br>(1962); Mhlongo<br>and Van Wyk<br>(2019); Mbanjwa<br>(2020)                                                                                                                         |           |
| <i>Rumex cordatus</i> Desf.<br>Synonym: <i>Rumex sarcorhizus</i><br>Link                                                                    | Sorrel, Dock (E),<br>Maksuring (A), Tongblaar<br>(KS)                                       | Polygonaceae  | Herb             | Leaves                          | warm leaves used as<br>compress on pains, inflamed<br>joints (e.g. a stiff neck)                                                                                                                                               | Nortje and van<br>Wyk (2015)                                                                                                                                                                            | 1         |
| <i>Rumex crispus</i> L. Synonyms:<br><i>Lapathum crispum</i> (L.) Scop.,<br><i>Rumex odontocarpus</i> Sandor ex<br>Borbás                   | Tongblaar, beestong (A)                                                                     | Polygonaceae  | Herb             | Leaves                          | Leaves used as compress on<br>sores, pain and inflammation                                                                                                                                                                     | Hulley and Van<br>Wyk (2019)                                                                                                                                                                            | 1         |
| <i>Ruta graveolens</i> L. Synonym:<br><i>Ruta hortensis</i> Mill.                                                                           | Rue, Common rue, Herb of<br>Grace, Garden Rue (E),<br>wynruit, wynruik (A),<br>Wynruit (KS) | Rutaceae      | Shrub            | Leaves,<br>stem                 | Leaf infusion used for<br>menstruation pains and<br>toothache. As compress for<br>low back pain and other<br>pains. Leaf infusion to relief<br>stomachache and treatment<br>of headache. Used for<br>inflammation and ear-ache | Nortje and van<br>Wyk (2015); Van<br>Wyk et al. (2008);<br>De Beer and Van<br>Wyk (2011);<br>Hulley and Van<br>Wyk (2019);<br>Philander (2011);<br>Thring and Weitz<br>(2006); Mintsu Mi<br>Nzue (2009) | 7         |
| <i>Salix mucronata</i> Thunb.<br>Synonyms: <i>Salix capensis</i> var.<br><i>mucronata</i> Anders, <i>Salix safsaf</i><br>Forssk. ex Trautv. | Wild willow (E), Treurwilg<br>Wildewilgerboom (A),<br>Munengeledzi (V),<br>Wilgerboom (KS)  | Salicaceae    | Tree             | Branch<br>tips, leaves,<br>bark | Indicated as remedy against<br>rheumatism. Leaf infusions<br>used for backache. Leaves<br>are used to treat pain.<br>Infusions of the bark is used<br>to treat rheumatism, pain and<br>inflammation.                           | Van Wyk and<br>Gericke (2000);<br>Nortje and van<br>Wyk (2015); De<br>Beer and Van<br>Wyk (2011);<br>Hulley and Van<br>Wyk (2019)                                                                       | 4         |
| <i>Salvia africana</i> L. = <i>Salvia<br/>africana-caerulea</i> L. Synonyms:                                                                | Blue African sage, blue<br>sage, wild sage, African<br>sage, purple sage (E),               | Lamiaceae     | Shrub            | Leaves                          | For treating menstrual<br>complaints                                                                                                                                                                                           | Philander (2011)                                                                                                                                                                                        | 1         |

| Botanical name                                                                                                                      | *Common name                                                                                                | Family                                            | Life-form | #Part used | Application                                                                                    | Reference                                             | Nm |
|-------------------------------------------------------------------------------------------------------------------------------------|-------------------------------------------------------------------------------------------------------------|---------------------------------------------------|-----------|------------|------------------------------------------------------------------------------------------------|-------------------------------------------------------|----|
| <i>Salvia colorata</i> Vahl, <i>Stiefia molucellae</i> (Benth.) Soják                                                               | blousalie, bloublomsalie, perdesalie, wildesalie (A.)                                                       |                                                   |           |            |                                                                                                |                                                       |    |
| <i>Salvia aurea</i> L. = <i>Salvia africana-lutea</i> L. Synonyms: <i>Crolocos aurea</i> (L.) Raf., <i>Salvia eckloniana</i> Benth. | Golden sage, beach sage, dune sage, sand sage (E), bruinsalie, sandsalie, strandsalie, geelblomsalie (A)    | Lamiaceae                                         | Shrub     | Leaves     | Externally used for swelling and sprains                                                       | Philander (2011)                                      | 1  |
| <i>Salvia chamelaeagnea</i> Berg. Synonyms: <i>Salvia chamelaeagnus</i> Burm.f., <i>Salvia paniculata</i> L.                        | Rough Blue Sage (E), Bloublomsalie (A)                                                                      | Lamiaceae                                         | Shrub     | ns         | Infusions are used to treat stomachache, pain and inflammation                                 | Hulley and Van Wyk (2019)                             | 1  |
| <i>Salvia dentata</i> Aiton                                                                                                         | Toothed sage (E), Bloublomsalie, bergsalie (KS)                                                             | Lamiaceae                                         | Shrub     | Leaves     | Leaves used for pains. Leaf decoctions are used for backache                                   | Nortje and van Wyk (2015); De Beer and Van Wyk (2011) | 2  |
| <i>Salvia microphylla</i> Kunth. Synonyms: <i>Salvia gasterantha</i> Briq., <i>Salvia odoratissima</i> Sessé & Moc.                 | baby sage, Graham's sage, or blackcurrant sage (E), rooisalie, rooiblomsalie (A)                            | Lamiaceae                                         | Shrub     | ns         | Infusions are used for treating backache                                                       | Hulley and Van Wyk (2019)                             | 1  |
| <i>Sansevieria hyacinthoides</i> (L.) Druce. Synonyms: <i>Acyntha guineensis</i> (L.) Medik., <i>Salmia guineensis</i> (L.) Cav.    | Mother-in-law's tongue, piles root, bowstring hemp (E), isiKholokotho, Iskhothakhotha, Isqunga sehlathi (Z) | Ruscaceae (Asparagaceae – World Flora Online)     | Herb      | Roots, ns  | Analgesic (toothache). The root is boiled in water and the water is gargled to treat toothache | Mhlongo and Van Wyk (2019); Corrigan et al. (2011)    | 2  |
| <i>Scabiosa columbaria</i> L. Synonyms: <i>Asterocephalus columbaria</i> (L.) Wallr., <i>Scabiosa anthemifolia</i> Eckl. & Zeyh.    | wild scabious (E), Upelepelane (Z)                                                                          | Dipsacaceae (Caprifoliaceae - World Flora Online) | Herb      | ns         | Musculo-skeletal (lower back problems)                                                         | Mhlongo and Van Wyk (2019)                            | 1  |
| <i>Scadoxus puniceus</i> (L.) Friis & Nordal. Synonyms: <i>Haemanthus fax-imperii</i> Cufod., <i>Haemanthus redouteanus</i> M.Roem. | Paintbrush lily, Snake lily (E), Idumbe likahloyile (Z)                                                     | Amaryllidaceae                                    | Herb      | ns         | Analgesic (fever, toothache)                                                                   | Mhlongo and Van Wyk (2019)                            | 1  |



| <b>Botanical name</b>                                                                                                                         | <b>*Common name</b>                                             | <b>Family</b> | <b>Life-form</b> | <b>#Part used</b>    | <b>Application</b>                                                                                                                                                                                                                                                                                                                              | <b>Reference</b>                                                                                                 | <b>Nm</b> |
|-----------------------------------------------------------------------------------------------------------------------------------------------|-----------------------------------------------------------------|---------------|------------------|----------------------|-------------------------------------------------------------------------------------------------------------------------------------------------------------------------------------------------------------------------------------------------------------------------------------------------------------------------------------------------|------------------------------------------------------------------------------------------------------------------|-----------|
| <i>Sceletium emarcidum</i> L. Bolus.<br>Synonyms: <i>Mesembryanthemum anatomicum</i> Haw.,<br><i>Mesembryanthemum emarcidum</i> Thunb.        | kanna(wortel), Kougoed (A)                                      | Aizoaceae     | Herb             | Leaves, whole plants | Inflammation. Whole plant is used for washing aching legs and treatment of toothache                                                                                                                                                                                                                                                            | Van Wyk et al. (2008); De Beer and Van Wyk (2011)                                                                | 2         |
| <i>Sceletium tortuosum</i> (L.) N.E.Br. Synonym: <i>Mesembryanthemum tortuosum</i> L.                                                         | kanna, tortuose fig marigold (E), Kougoed, springbok-slaai (KS) | Aizoaceae     | Creeper          | Leaves               | Leaves are chewed and used for stomach ache, headache and toothache                                                                                                                                                                                                                                                                             | Nortje and van Wyk (2015); Hulley and Van Wyk (2019)                                                             | 2         |
| <i>Schinus molle</i> L. Synonyms: <i>Schinus angustifolia</i> Sessé & Moc., <i>Schinus occidentalis</i> Sessé & Moc.                          | Peruvian pepper, pepper tree (E), peperboom (KS), peperboom (A) | Anacardiaceae | Tree             | Leaves               | Leaves as compress on painful legs, backache, headache and knee. Warm compress of leaves is placed on cheek for toothache. Vapour of leaf decoction is inhaled for inflammation and rheumatism. Leaf decoction is used to gargle to cure toothache. Compress for headache, pain and inflammation. Infusions for headache, pain and inflammation | Nortje and van Wyk (2015); Van Wyk et al. (2008); Bhat and Jacobs (1995); Bhat (2014); Hulley and Van Wyk (2019) | 5         |
| <i>Schizocarphus nervosus</i> (Burch.) van der Merwe. Synonyms: <i>Scilla nervosa</i> (Burch.) J.P.Jessop, <i>Drimia dregeana</i> Kunth       | White Scilla (E), Sandlelie (A), Magaqana (X), ngcino (Z)       | Asparagaceae  | Herb             | Bulbs                | Diluted bulb decoctions are used in small doses for pain in rheumatic fever, taken for one day only                                                                                                                                                                                                                                             | Bryant (1966); Watt and Breyer-Brandwijk (1962)                                                                  | 2         |
| <i>Schkuhria pinnata</i> (Lam.) Kuntze ex Thell. Synonyms: <i>Amblyopappus mendocinus</i> Phil., <i>Schkuhria pinnata</i> var. <i>pinnata</i> | Dwarf marigold (E), Luswielo (V)                                | Asteraceae    | Herb             | Leaves, roots        | Roots or leaves are chewed and swallowed for dysmenorrhoea                                                                                                                                                                                                                                                                                      | Mahwasane et al. (2013)                                                                                          | 1         |

| <b>Botanical name</b>                                                                                                                                                                   | <b>*Common name</b>                                                                                                                                                                                 | <b>Family</b> | <b>Life-form</b> | <b>#Part used</b>          | <b>Application</b>                                                                                                            | <b>Reference</b>                                                                                     | <b>Nm</b> |
|-----------------------------------------------------------------------------------------------------------------------------------------------------------------------------------------|-----------------------------------------------------------------------------------------------------------------------------------------------------------------------------------------------------|---------------|------------------|----------------------------|-------------------------------------------------------------------------------------------------------------------------------|------------------------------------------------------------------------------------------------------|-----------|
| <i>Schotia afra</i> (L.) Thunb.<br>Synonym: <i>Guaiacum afrum</i> L.                                                                                                                    | Karoo boer-bean (E),<br>Karoohuilboerboon (A)                                                                                                                                                       | Fabaceae      | Tree             | Leaves                     | Leaf infusion used to treat stomach ailment                                                                                   | Hulley and Van Wyk (2019)                                                                            | 1         |
| <i>Schotia brachypetala</i> Sond.<br>Synonym: <i>Schotia semireducta</i> Merxm.                                                                                                         | Weeping boer-bean, tree fuchsia, African walnut (E), huilboerboon (A), umfofofo, ishimnumyane (X), molope (NS), mulibi, mununzwa, mununzwu, mutanswa (V), umutwa (TW), ihluze, umgxamu, uvovovo (Z) | Fabaceae      | Tree             | Bark, leaves, roots, seeds | For treating backache. Root decoction is used for shoulder pains. Seed decoction is used for sternum pains                    | Mintsa Mi Nzue (2009); Tshikalange et al. (2016)                                                     | 2         |
| <i>Sclerocarya birrea</i> (A.Rich.) Hochst. subsp. <i>caffra</i> (Sond.) Kokwaro. Synonyms: <i>Sclerocarya birrea</i> ; <i>Sclerocarya caffra</i> , <i>Sclerocarya schweinfurthiana</i> | Cider tree, marula, maroola (E), maeroola, maroelaboom (A), Mufula (V), umganu (Z)                                                                                                                  | Anacardiaceae | Tree             | Bark                       | Bark decoctions are used for abdominal pain. The bark for is used for headaches, toothache (rinsing oral cavity) and backache | Hutchings et al. (1996); Mabogo (1990); Watt and Breyer-Brandwijk (1962); Arnold and Gulumian (1984) | 4         |
| <i>Searsia lancea</i> (L.f.) F.A.Barkley. Synonyms: <i>Rhus lancea</i> L.f., <i>Toxicodendron lanceum</i> (L.f.) Kuntze                                                                 | karee (E), karee, rooikaree (A), mokalabata, monhlohlo, motshakhutshakhu (NS), mosinabele, mosilabele (SS), mosabele, mosilabele (TW), mushakaladza (V), umhlakotshane (X)                          | Anacardiaceae | Tree             | Bark                       | Bark infusion used to treat stomachache                                                                                       | Hulley and Van Wyk (2019)                                                                            | 1         |
| <i>Searsia leptodictya</i> (Diels) T.S.Yi, A.J.Mill. & J.Wen. Synonyms: <i>Rhus leptodictya</i> Diels, <i>Rhus rhombocarpa</i> A. Fern. & R. Fern                                       | Mountain karee, rock karee (E), bergkaree, klipkaree (A), Mohlwehlwe (NS), Mushakaladza (V)                                                                                                         | Anacardiaceae | Tree             | Bark, root                 | Smoke, inhaled under blanket to relieve headache                                                                              | Arnold and Gulumian (1984)                                                                           | 1         |
| <i>Searsia undulata</i> (Jacq.) T.S.Yi, A.J.Mill. & J.Wen. Synonyms: <i>Rhus undulata</i> Jacq.,                                                                                        | Kuni-bush (E), taaibos, koeniebos, slapbos (A)                                                                                                                                                      | Anacardiaceae | Tree             | ns                         | Infusions are used for backache                                                                                               | Hulley and Van Wyk (2019)                                                                            | 1         |

| Botanical name                                                                                                                                                        | *Common name                                                                          | Family       | Life-form | #Part used               | Application                                                                                                                                                                 | Reference                                                                                                              | Nm |
|-----------------------------------------------------------------------------------------------------------------------------------------------------------------------|---------------------------------------------------------------------------------------|--------------|-----------|--------------------------|-----------------------------------------------------------------------------------------------------------------------------------------------------------------------------|------------------------------------------------------------------------------------------------------------------------|----|
| <i>Toxicodendron undulatum</i> (Jacq.) Kuntze                                                                                                                         |                                                                                       |              |           |                          |                                                                                                                                                                             |                                                                                                                        |    |
| <i>Secamone gerrardii</i> Harv. ex Benth.                                                                                                                             | Ubuka (X), Inhlule-lemamba, Iphophoma, Ugobandlovu, Umhloniyise (Z)                   | Apocynaceae  | Herb      | Roots, bark              | Roots and bark are used to relieve sharp chest pains                                                                                                                        | Hutchings et al. (1996)                                                                                                | 1  |
| <i>Securidaca longepedunculata</i> Fresen. Synonyms: <i>Elsota longipedunculata</i> (Fresen.) Kuntze, <i>Securidaca longipedunculata</i> var. <i>longipedunculata</i> | Violet tree (E), Langboslaagboom (A), Mpesu (V)                                       | Polygalaceae | Tree      | Bark, roots, root-kernel | Bark and roots are taken orally as infusions and decoctions for rheumatism. Root-kernel is used to treat headache. Root decoction is drunk thrice daily to relieve backache | Van Wyk and Gericke (2000); Watt and Breyer-Brandwijk (1962); Mongalo and Makhafola (2018); Arnold and Gulumian (1984) | 4  |
| <i>Senecio cinerascens</i> Aiton. Synonyms: <i>Cineraria seminuda</i> Klatt ex Schinz, <i>Senecio tomentosus</i> Salisb.                                              | Handjebos (A), Vieroulap, oulap (KS)                                                  | Asteraceae   | Herb      | Leaves                   | Used as compress for headache. Leaf infusion (or compress) used topically for pains                                                                                         | Nortje and van Wyk (2015)                                                                                              | 1  |
| <i>Senecio serratuloides</i> DC. Synonyms: <i>Senecio serratuloides</i> var. <i>glabratus</i> (DC.) DC., <i>Senecio serratuloides</i> var. <i>serratuloides</i>       | Two-day Cure (E), Unsukumbili, Unsukumbili wehlathi (Z)                               | Asteraceae   | Herb      | ns                       | Analgesic (general pains), Musculo-skeletal (inflammation)                                                                                                                  | Mhlongo and Van Wyk (2019)                                                                                             | 1  |
| <i>Senecio speciosus</i> Willd. Synonyms: <i>Senecio concolor</i> DC., <i>Senecio concolor</i> var. <i>concolor</i>                                                   | Idambiso (X), Sebea-mollose-senye-nyane (SS) Inzwabuhlungu, Ibohlololo, Idambiso (Z), | Asteraceae   | Herb      | Leaves                   | Inflammations                                                                                                                                                               | Maroyi (2017)                                                                                                          | 1  |
| <i>Senegalia burkei</i> (Benth.) Kyal. & Boatwr. Synonym: <i>Acacia burkei</i> Benth.                                                                                 | Black monkey thorn (E), swartapiesdoring (A), umkhaya, whelalahlatini (Z)             | Fabaceae     | Tree      | Bark, roots              | Bark and roots are used for eye and back complaints                                                                                                                         | Pooley (1993)                                                                                                          | 1  |
| <i>Senegalia caffra</i> (Thunb.) P.J.H. Hurter & Mabb.                                                                                                                | Hook-thorn, <i>Acacia caffra</i> (E), Gewone haakdoring                               | Fabaceae     | Tree      | ns                       | Used for toothache                                                                                                                                                          | Mbanjwa (2020)                                                                                                         | 1  |

| Botanical name                                                                                                                                                           | *Common name                                                                                                                                                                                               | Family     | Life-form | #Part used          | Application                                                                                                                                                                                                                                                                                                                                                            | Reference                                                                                                                                                                                                      | Nm |
|--------------------------------------------------------------------------------------------------------------------------------------------------------------------------|------------------------------------------------------------------------------------------------------------------------------------------------------------------------------------------------------------|------------|-----------|---------------------|------------------------------------------------------------------------------------------------------------------------------------------------------------------------------------------------------------------------------------------------------------------------------------------------------------------------------------------------------------------------|----------------------------------------------------------------------------------------------------------------------------------------------------------------------------------------------------------------|----|
|                                                                                                                                                                          | (A), Mositsana (NS)<br>Isakhamuzi, Umthole,<br>Umtholo (Z)                                                                                                                                                 |            |           |                     |                                                                                                                                                                                                                                                                                                                                                                        |                                                                                                                                                                                                                |    |
| <i>Senna didymobotrya</i> (Fresen.)<br>H.S.Irwin & Barneby.<br>Synonyms: <i>Cassia nairobiensis</i><br>Hort. ex L. H. Bailey, <i>Cassia</i><br><i>verdickii</i> De Wild. | African senna, popcorn<br>senna, candelabra tree,<br>peanut butter cassia (E),<br>motokomane (SP)                                                                                                          | Fabaceae   | Shrub     | Roots               | The roots are boiled and the<br>extract drank as treatment for<br>a painful body                                                                                                                                                                                                                                                                                       | Mogale et al.<br>(2019)                                                                                                                                                                                        | 1  |
| <i>Senna obtusifolia</i> (L.) H.S.Irwin<br>& Barneby. Synonyms: <i>Cassia</i><br><i>contorta</i> Vogel, <i>Diallobus</i><br><i>falcatus</i> Raf.                         | Chinese senna, sicklepod<br>(E), Mutsheketsheke (V)                                                                                                                                                        | Fabaceae   | Herb      | Roots               | Roots are boiled and the<br>mixture drank for treating<br>dysmenorrhoea                                                                                                                                                                                                                                                                                                | Mahwasane et al.<br>(2013)                                                                                                                                                                                     | 1  |
| <i>Senna petersiana</i> (Bolle) Lock.<br>Synonym: <i>Cassia petersiana</i><br>Bolle                                                                                      | Dwarf Cassia, eared Cassia,<br>Eared Senna, Monkey Pod,<br>Monkey Senna (E),<br>Apiespeul (A), Bohlôko<br>(NS), Munembenembe (V),<br>Umnembenembe (Z)                                                      | Fabaceae   | Shrub     | Roots               | Roots are boiled and the<br>mixture drank for treating<br>dysmenorrhoea. Root<br>decoction is used to rinse the<br>oral cavity to relieve<br>toothache                                                                                                                                                                                                                 | Mahwasane et al.<br>(2013); Arnold<br>and Gulumian<br>(1984)                                                                                                                                                   | 2  |
| <i>Seriphium plumosum</i> L.<br>Synonyms: <i>Stoebe plumosa</i> (L.)<br>Thunb., <i>Artemisia vermiculata</i><br>L.                                                       | Silver stoebe (E), slangbos,<br>vaalbossie, Khoi-kooigoed<br>(A), Hotnotswortel (KS)                                                                                                                       | Asteraceae | Shrub     | Leaves              | Leaf infusion used for<br>treatment of backache                                                                                                                                                                                                                                                                                                                        | Nortje and van<br>Wyk (2015)                                                                                                                                                                                   | 1  |
| <i>Solanum aculeastrum</i> Dunal.<br>Synonym: <i>Solanum aculeastrum</i><br>var. <i>aculeastrum</i>                                                                      | Apple of Sodom, bitter<br>apple, devil's apple (E),<br>Bitterappeltjie, Bokappel<br>(A), Morola (NS),<br>Murulwa, Shulwa (V),<br>Intuma, Intuma, Intuma<br>enkulu, Intumayezibaya,<br>Uthuma, Untumane (Z) | Solanaceae | Shrub     | Fruit, roots,<br>ns | Ash from burnt fruit is<br>rubbed into scarifications<br>over painful parts for the<br>relief of rheumatism pains.<br>Fruits applied topically for<br>toothache and are also placed<br>in the wound after tooth<br>extraction. Fruit decoctions<br>are used as enemas for pain<br>in the lower back and legs<br>while ash is used for pains<br>from walking. Analgesic | Watt and Breyer-<br>Brandwijk<br>(1962); Hutchings<br>et al. (1996);<br>Mhlongo and Van<br>Wyk (2019);<br>Mongalo and<br>Makhafola<br>(2018); Philander<br>(2011); Mintsu Mi<br>Nzue (2009);<br>Mbanjwa (2020) | 7  |

| Botanical name                                                                                                                    | *Common name                                                                               | Family     | Life-form | #Part used            | Application                                                                                                                            | Reference                                                 | Nm |
|-----------------------------------------------------------------------------------------------------------------------------------|--------------------------------------------------------------------------------------------|------------|-----------|-----------------------|----------------------------------------------------------------------------------------------------------------------------------------|-----------------------------------------------------------|----|
|                                                                                                                                   |                                                                                            |            |           |                       | (toothache, general pains, back aches), musculo-skeletal (inflammation). Roots are used to treat stomachache                           |                                                           |    |
| <i>Solanum aculeatissimum</i> Jacq.<br>Synonyms: <i>Solanum cavaleriei</i> H. Lév. & Vaniot, <i>Solanum khasianum</i> C.B. Clarke | Apple of Sodom (E), ituma elikhulu, umthuma (Z)                                            | Solanaceae | Shrub     | Root, whole plant     | Root decoctions are taken for backache and steam from burning plants is used for toothache                                             | Hutchings et al. (1996)                                   | 1  |
| <i>Solanum americanum</i> Mill.<br>Synonyms: <i>Solanum nigrum</i> L., <i>Solanum adventitium</i> Polgar                          | Black berry, woody night shade (E), isihlalakuhle, udoye, ugqumgqumu, ugwabha, umaguqa (Z) | Solanaceae | Herb      | Fruit, leaves, roots  | Roots are used for the rheumatic pain. Fruit and leaves are used for abdominal pain and inflammation of the bladder                    | Hutchings et al. (1996)                                   | 1  |
| <i>Solanum capense</i> L.                                                                                                         | Nightshade (E), Monyaku (SS), Umthumana (X), Isithumana (Z)                                | Solanaceae | Shrub     | Fruits                | Powdered fruit is inserted into cavities for toothache and also into wounds after tooth extraction                                     | Gerstner (1941)                                           | 1  |
| <i>Solanum elaeagnifolium</i> Cav.<br>Synonyms: <i>Solanum dealbatum</i> Lindl., <i>Solanum obtusifolium</i> Dunal                | Silver-leaf nightshade (E), satansbos (A)                                                  | Solanaceae | Shrub     | Fruits                | The fruit is burned on the fire and the smoke is taken into the mouth to take away pain in the teeth                                   | Corrigan et al. (2011)                                    | 1  |
| <i>Solanum hermannii</i> Dunal.<br>Synonyms: <i>Solanum sodomeum</i> var. <i>hermannii</i> Dunal, <i>Solanum sodomeum</i>         | Bitter apple (E), Umthuma (Z)                                                              | Solanaceae | Shrub     | Roots, leaves, fruits | Root infusions and decoctions are used for abdominal pain. Leaf decoctions are taken for backache. Crushed fruit is used for toothache | Hutchings et al. (1996); Watt and Breyer-Brandwijk (1962) | 2  |
| <i>Solanum incanum</i> L. Synonyms: <i>Solanum bojeri</i> Dunal, <i>Solanum sanctum</i> L.                                        | Bitter Apple, Sodom Apple (E), Intuma, Intuma encane, Umagangeni (Z)                       | Solanaceae | Herb      | Fruits, roots, ns     | Analgesic (lower back aches, toothache). Fruits and roots are used for treating toothache and sprain                                   | Mhlongo and Van Wyk (2019); Mbanjwa (2020)                | 2  |

| <b>Botanical name</b>                                                                                                                                 | <b>*Common name</b>                                                                                           | <b>Family</b> | <b>Life-form</b> | <b>#Part used</b> | <b>Application</b>                                                                                                                                                                               | <b>Reference</b>                                                                     | <b>Nm</b> |
|-------------------------------------------------------------------------------------------------------------------------------------------------------|---------------------------------------------------------------------------------------------------------------|---------------|------------------|-------------------|--------------------------------------------------------------------------------------------------------------------------------------------------------------------------------------------------|--------------------------------------------------------------------------------------|-----------|
| <i>Solanum marginatum</i> L.f.                                                                                                                        | Purple African nightshade (E), Intuma (Z)                                                                     | Solanaceae    | Shrub            | ns                | Analgesic (toothache), musculo-skeletal (inflammation)                                                                                                                                           | Mhlongo and Van Wyk (2019)                                                           | 1         |
| <i>Solanum mauritianum</i> Scop.<br>Synonyms: <i>Solanum tabacifolium</i> Vell., <i>Solanum verbascifolium</i> var. <i>auriculatum</i> (Aiton) Kuntze | Bugweed (E), Mothollo (NS), Umbhangabhanga, Ugwayana (Z)                                                      | Solanaceae    | Shrub            | Roots, ns         | Used to mitigate ear-ache. Roots are used to treat stomachache                                                                                                                                   | Mhlongo and Van Wyk (2019); Mongalo and Makhafola (2018)                             | 2         |
| <i>Solanum panduriforme</i> E. Mey.                                                                                                                   | Morolana (NS), Mututulwa (V), Intuma encane (Z)                                                               | Solanaceae    | Herb             | Roots, fruits, ns | Analgesic (toothache), musculo-skeletal (inflammation). Roots are used to treat stomachache, Fruits are burned and powder is applied externally on incision made on forehead to relieve headache | Mhlongo and Van Wyk (2019); Mongalo and Makhafola (2018); Arnold and Gulumian (1984) | 3         |
| <i>Solanum retrofractum</i> L = <i>Lycianthes stellata</i> Bitter                                                                                     | Nastergal, nasgal (A)                                                                                         | Solanaceae    | Herb             | ns                | Infusions used for treatment of inflammation                                                                                                                                                     | Hulley and Van Wyk (2019)                                                            | 1         |
| <i>Solanum supinum</i> Dunal.<br>Synonyms: <i>Solanum aranoideum</i> Dammer, <i>Solanum lyratifolium</i> Dammer                                       | Morola (NS)                                                                                                   | Solanaceae    | Herb             | Roots             | Roots are used to treat stomachache                                                                                                                                                              | Mongalo and Makhafola (2018)                                                         | 1         |
| <i>Solanum tomentosum</i> L.                                                                                                                          | Slangappelbos (E), gifappel, Vuilsiekbossie, Doringappeltjie, !nuheis, bitterboelabos (A), Tandpynbossie (KS) | Solanaceae    | Shrub            | Fruits, leaves    | Fruit is used for toothache. Ground leaves is a treatment for backache and stomachache                                                                                                           | Nortje and van Wyk (2015); De Beer and Van Wyk (2011); Hulley and Van Wyk (2019)     | 3         |
| <i>Solanum retroflexum</i> Dunal                                                                                                                      | Nightshade (E), Muxe (V)                                                                                      | Solanaceae    | Herb             | Leaves            | Squeezed liquid from leaves is used to treat earache in children.                                                                                                                                | Mokganya and Tshisikhawe (2019)                                                      | 1         |
| <i>Sonchus asper</i> (L.) Hill.<br>Synonyms: <i>Sonchus aemulus</i>                                                                                   | Prickly Sowthistle, spiney Sowthistle, corky-bark (E), irhwabe (X)                                            | Asteraceae    | Herb             | Leaves            | Leaf decoction prepared from approximately two glasses of water allowed to                                                                                                                       | Bhat (2014)                                                                          | 1         |

| Botanical name                                                                                                                                         | *Common name                                                                                       | Family        | Life-form | #Part used    | Application                                                                                                                                                           | Reference                                                                                                           | Nm |
|--------------------------------------------------------------------------------------------------------------------------------------------------------|----------------------------------------------------------------------------------------------------|---------------|-----------|---------------|-----------------------------------------------------------------------------------------------------------------------------------------------------------------------|---------------------------------------------------------------------------------------------------------------------|----|
| Merino, <i>Sonchus carolinianus</i> Walter                                                                                                             |                                                                                                    |               |           |               | stand for 1 hour and taken orally to treat chronic stomachache                                                                                                        |                                                                                                                     |    |
| <i>Spermacoce natalensis</i> Hochst. Synonyms: <i>Borreria natalensis</i> (Hochst.) K.Schum. ex S.Moore, <i>Diodia natalensis</i> (Hochst.) J.G.García | Isimuyisane, Isindiyandiya, Insulansula (Z)                                                        | Rubiaceae     | Herb      | ns            | Used to treat painful neck                                                                                                                                            | Mbanjwa (2020)                                                                                                      | 1  |
| <i>Spilanthes mauritiana</i> (A.Rich. ex Pers.) DC.                                                                                                    | Tshishengelaphofu (V), Isishoshokazane, Isisinini (Z)                                              | Asteraceae    | Creepers  | ns            | Analgesic (toothache)                                                                                                                                                 | Mhlongo and Van Wyk (2019); Mbanjwa (2020)                                                                          | 2  |
| <i>Spirostachys africana</i> Sond. Synonyms: <i>Excoecaria africana</i> (Sond.) Müll.Arg., <i>Spirostachys synandra</i> (Pax) Pax                      | tamboti (E), tambotie (A), umThombothi (Zulu); Modiba (NS), Morukuru (TW), Muonze (V)              | Euphorbiaceae | Tree      | Bark/wood     | Smoke of the burning wood is inhaled to relieve headache                                                                                                              | Arnold and Gulumian (1984)                                                                                          | 1  |
| <i>Stachys cuneata</i> Banks ex Benth. Synonym: <i>Stachys denticulata</i> Burch. ex Benth.                                                            | Bergtee, vaaltee (A)                                                                               | Lamiaceae     | Herb      | ns            | For painful body                                                                                                                                                      | Van Wyk et al. (2008)                                                                                               | 1  |
| <i>Stangeria eriopus</i> (Kunze) Baill. Synonyms: <i>Stangeria katzeri</i> Regel, <i>Stangeria paradoxa</i> T.Moore                                    | Natal Grass Cycad, Cycad (E), obbejaankos (A), Umfingwani, Umncuma (X), Imfingo, Umafinga (Z)      | Zamiaceae     | Shrub     | Tubers, roots | Burnt powdered underground tubers are used for headaches. Tubers are used for pains in the bones. Analgesic (sharp internal body pains). Roots used to treat headache | Hutchings et al. (1996); Watt and Breyer-Brandwijk (1962); Mhlongo and Van Wyk (2019); Coopoosamy and Naidoo (2012) | 4  |
| <i>Stapelia gigantea</i> N.E.Br. Synonyms: <i>Gonostemon giganteus</i> (N.E.Br.) P.V.Heath, <i>Stapelia meintjesii</i> Verd.                           | Giant carrion flower, Giant Stapelia (E), Reeuseasblom (A), ililo elikhulu, isihlehle, uzililo (Z) | Apocynaceae   | Herb      | Whole plant   | Ash from burnt plants is rubbed into scarifications made on the body or limbs to relieve pain                                                                         | Watt and Breyer-Brandwijk (1962)                                                                                    | 1  |
| <i>Stapelia nobilis</i> N.E.Br. ex Hook.f. Synonym: <i>Gonostemon</i>                                                                                  | Madadza shango (V)                                                                                 | Apocynaceae   | Herb      | Roots         | Root decoction is prepared and the body is exposed to                                                                                                                 | Arnold and Gulumian (1984)                                                                                          | 1  |

| Botanical name                                                                                                                          | *Common name                                                                                                                                      | Family      | Life-form | #Part used  | Application                                                                                                                                                                                                                            | Reference                                                                                               | Nm |
|-----------------------------------------------------------------------------------------------------------------------------------------|---------------------------------------------------------------------------------------------------------------------------------------------------|-------------|-----------|-------------|----------------------------------------------------------------------------------------------------------------------------------------------------------------------------------------------------------------------------------------|---------------------------------------------------------------------------------------------------------|----|
| <i>giganteus</i> var. <i>nobilis</i> (Hook.f.)<br>P.V.Heath                                                                             |                                                                                                                                                   |             |           |             | the steam to relieve general body ache                                                                                                                                                                                                 |                                                                                                         |    |
| <i>Stoebe capitata</i> P.J.Bergius.<br>Synonyms: <i>Gymnachaena bruniades</i> Rchb. ex DC., <i>Stoebe bruniades</i> (Rchb.) Levyns      | Groen slangbos (A)                                                                                                                                | Asteraceae  | Shrub     | Leaves      | Leaves are used for treating stomach and menstrual complaints                                                                                                                                                                          | Philander (2011)                                                                                        | 1  |
| <i>Stoebe incana</i> Thunb. = <i>Seriphium incanum</i> (Thunb.) Pers. Synonym: <i>Stoebe leiocarpa</i> Sch.Bip.                         | Vit moerbos (A)                                                                                                                                   | Asteraceae  | Shrub     | Leaves      | Leaves are used for treating menstrual complaints                                                                                                                                                                                      | Philander (2011)                                                                                        | 1  |
| <i>Stoebe plumosa</i> (L.) Thunb. = <i>Seriphium plumosum</i> L.                                                                        | silver stoebe (E), slangbos, vaalbossie, Khoi-kooigoed, Grys slangbos (A)                                                                         | Asteraceae  | Shrub     | Leaves      | Leaves are used for treating stomach and menstrual complaints                                                                                                                                                                          | Philander (2011)                                                                                        | 1  |
| <i>Strychnos cocculoides</i> Baker.<br>Synonyms: <i>Strychnos paralleloneura</i> Gilg & Busse, <i>Strychnos suberosa</i> De Wild.       | Corky-bark monkey-orange (E), kurkbasklapper (A), morapa (NS), umnonono (X)                                                                       | Loganiaceae | Tree      | Bark        | Approximately two spoons grated bark is mixed with about 2 glasses of water which is allowed to stand for 1 hour and taken orally to treat stomachache                                                                                 | Bhat (2014)                                                                                             | 1  |
| <i>Strychnos henningsii</i> Gilg.<br>Synonyms: <i>Strychnos albersii</i> Gilg & Busse.; <i>Strychnos holstii</i> Gilg                   | Coffee bean Strychnos, Natal teak, coffee hard pear (E), haclepeer(hout), rooibitterbessie (A), umanana, umdunye, umnono, umqalothi, umqaloti (Z) | Loganiaceae | Shrub     | Roots, bark | Boiled roots are used for stomach complaints. Bark decoctions boiled with roots of <i>Turraea floribunda</i> Hochst are taken for the pains of rheumatic fever. Bark is used in the treatment of dysmenorrhoea. Analgesic (body pains) | Hutchings et al. (1996); Watt and Breyer-Brandwijk (1962); Mhlongo and Van Wyk (2019); Philander (2011) | 4  |
| <i>Strychnos madagascariensis</i> Poir. Synonyms: <i>Strychnos burtonii</i> Baker, <i>Strychnos unguacha</i> var. <i>micrantha</i> Gilg | Black monkey orange (E); swartklapper, botterklapper (A), Morapa (NS), Mogorwagorwana (TW), Mukwakwa (V),                                         | Loganiaceae | Tree      | Roots       | Roots are used to treat footache. Roots are roasted and sap is dropped on tooth to relieve toothache                                                                                                                                   | Mongalo and Makhafola (2018); Arnold and Gulumian (1984)                                                | 2  |



| Botanical name                                                                                                                                                        | *Common name                                                                                                      | Family        | Life-form | #Part used                                        | Application                                                                                                                                                                                                                          | Reference                                                                                                                                                          | Nm |
|-----------------------------------------------------------------------------------------------------------------------------------------------------------------------|-------------------------------------------------------------------------------------------------------------------|---------------|-----------|---------------------------------------------------|--------------------------------------------------------------------------------------------------------------------------------------------------------------------------------------------------------------------------------------|--------------------------------------------------------------------------------------------------------------------------------------------------------------------|----|
|                                                                                                                                                                       | umGluguza, umKwakwa (Z)                                                                                           |               |           |                                                   |                                                                                                                                                                                                                                      |                                                                                                                                                                    |    |
| <i>Sutherlandia frutescens</i> (L.) R.Br. = <i>Lessertia frutescens</i> (L.) Goldblatt & J.C.Manning subsp. <i>frutescens</i> . Synonym: <i>Colutea frutescens</i> L. | Turkey flower, balloon pea, cancer bush (E), Wildekeur (A), Kankerbossie (KS), Umnwele (X), Umnwele, Unwele (Z)   | Fabaceae      | Herb      | leaves, fruits, seeds, stem, flowers, whole plant | Different parts of the plant are used for treating backache and rheumatism. Leaf wash used for painful feet. Chewed in the mouth and placed on tooth to help with toothache. Infusion is used to treat backache and stomach ailments | Watt and Breyer-Brandwijk (1962); Nortje and van Wyk (2015); De Beer and Van Wyk (2011); Hulley and Van Wyk (2019); Thring and Weitz (2006); Mintsá Mi Nzue (2009) | 6  |
| <i>Sutherlandia microphylla</i> Burch.                                                                                                                                | Wildekeur, kalkoenbel, kankerbos (A)                                                                              | Fabaceae      | Herb      | Leaves                                            | Leaves are used for back pain, stomach pain and kidney pain                                                                                                                                                                          | Van Wyk et al. (2008)                                                                                                                                              | 1  |
| <i>Symphytum officinale</i> L. Synonyms: <i>Consolida major</i> Garsault, <i>Symphytum peregrinum</i> Ledeb.                                                          | Comfrey (E)                                                                                                       | Boraginaceae  | Herb      | Leaves                                            | Young leaves are eaten and wrapped around sprains to relieve pains                                                                                                                                                                   | Philander (2011)                                                                                                                                                   | 1  |
| <i>Synadenium cupulare</i> L.C. Wheeler = <i>Euphorbia cupularis</i> Boiss. Synonym: <i>Synadenium arborescens</i> Boiss.                                             | Crying Tree, Dead-man's Tree (E), Dooiemansboom, Gifboom (A), Mulambanoni, muswoswo (V), Umdlebe, Umdletshane (Z) | Euphorbiaceae | Tree      | Roots                                             | Burned roots are mixed with petroleum jelly and rubbed on swollen ankle                                                                                                                                                              | Arnold and Gulumian (1984)                                                                                                                                         | 1  |
| <i>Syzygium cordatum</i> Hochst.ex C.Krauss. Synonyms: <i>Syzygium cymiferum</i> (E.Mey.) C.Presl, <i>Jambosa cymifera</i> E.Mey.                                     | Water Wood, water berry (E), waterbessie (A), Mutu (V), umswi, umjomi (X), Umdoni (Z)                             | Myrtaceae     | Tree      | Bark, leaves, roots                               | The Bemba use cold leaf infusions for various stomach ailments. Vhavenda use leaves for fever while bark and roots are used for headache. For treating inflammation. Roots are burned and the ash is applied                         | Hutchings et al. (1996); Watt and Breyer-Brandwijk (1962); Mabogo (1990); Maroyi (2017); Arnold and Gulumian                                                       | 6  |

| Botanical name                                                                                                                            | *Common name                                                                                                            | Family       | Life-form | #Part used | Application                                                                                                                                                                                                                                                                                                                                                                      | Reference                                              | Nm |
|-------------------------------------------------------------------------------------------------------------------------------------------|-------------------------------------------------------------------------------------------------------------------------|--------------|-----------|------------|----------------------------------------------------------------------------------------------------------------------------------------------------------------------------------------------------------------------------------------------------------------------------------------------------------------------------------------------------------------------------------|--------------------------------------------------------|----|
|                                                                                                                                           |                                                                                                                         |              |           |            | on incisions on forehead to relieve headache. Used for relieving menstrual pain                                                                                                                                                                                                                                                                                                  | (1984); Mbanjwa (2020)                                 |    |
| <i>Tabernaemontana elegans</i> Stapf. Synonyms: <i>Conopharyngia elegans</i> (Stapf) Stapf, <i>Leptopharyngia elegans</i> (Stapf) Boiteau | toad tree (E), laeveldse paddaboom (A), mahatu (V), umKhahlwana, umKhadlu (Z)                                           | Apocynaceae  | Tree      | Roots      | Root decoction is used to prepare soft porridge to relieve stomachache. Root maceration is taken to relieve stomachache. Root maceration is used to prepare porridge for 1 month to relieve stomachache in women. Maceration of root powder is drunk or used to prepare sot porridge to relieve stomachache in women. Exposure to burnt root under a blanket to relieve headache | Arnold and Gulumian (1984)                             | 1  |
| <i>Tagetes minuta</i> L. Synonyms: <i>Tagetes bonariensis</i> Pers., <i>Tagetes glandulosa</i> Schrank ex Link                            | Khaki weed, African marigold (E), Mushushathuri, mukakambanzhe (V), Ikhambi lempaka, Insangu katikoloshe, Usangwana (Z) | Asteraceae   | Herb      | Leaves, ns | Leaves are buned and the smoke inhaled for headache. Analgesic (toothache)                                                                                                                                                                                                                                                                                                       | Mhlongo and Van Wyk (2019); Arnold and Gulumian (1984) | 2  |
| <i>Tanacetum parthenium</i> (L.) Sch.Bip. Synonyms: <i>Chrysanthemum parthenium</i> (L.) Pers., <i>Parthenium matricaria</i> Gueldenst.   | Fever few (E), ubushwa (X)                                                                                              | Asteraceae   | Herb      | Leaves     | Drop of the leaf decoction is placed in infected ear 2-3 times daily to treat inflammation of the ear                                                                                                                                                                                                                                                                            | Bhat (2013)                                            | 1  |
| <i>Tecoma capensis</i> (Thunb.) Lindl. Synonyms: <i>Tecomaria capensis</i> (Thunb.) Spach, <i>Bignonia capensis</i> Thunb.                | Cape honeysuckle (E), Kaapse kamperfoelie, trompetters (A), Icakatha, Umsilingi (X), uchahacha,                         | Bignoniaceae | Shrub     | Bark       | Dried powdered bark infusions are taken for fevers, pain and stomach pains. Relieve pain and                                                                                                                                                                                                                                                                                     | Watt and Breyer-Brandwijk (1962); Mhlongo              | 2  |

| Botanical name                                                                                                                             | *Common name                                                                               | Family           | Life-form | #Part used | Application                                                          | Reference                                  | Nm |
|--------------------------------------------------------------------------------------------------------------------------------------------|--------------------------------------------------------------------------------------------|------------------|-----------|------------|----------------------------------------------------------------------|--------------------------------------------|----|
|                                                                                                                                            | Incwincwi, Uthswala benyoni (Z)                                                            |                  |           |            | induce sleep and is rubbed on bleeding gums. Analgesic (backaches)   | and Van Wyk (2019)                         |    |
| <i>Teedia lucida</i> (ex Sol.) Rudolphi                                                                                                    | Stinkbos, Glossy Lilac Berry (E), Klipdruwe (KS), Hlwenya (Z)                              | Scrophulariaceae | Shrub     | ns         | Infusion is a remedy for inflammation                                | Nortje and van Wyk (2015)                  | 1  |
| <i>Terminalia phanerophlebia</i> Engl. & Diels                                                                                             | Lebombo cluster-leaf (E), Lebombotrosblaar (A), amaNgwe-amnyama, amaNgwe-omphofu (Z)       | Combretaceae     | Tree      | Roots      | Roots are rubbed into scarifications for rheumatic ailments          | Watt and Breyer-Brandwijk (1962)           | 1  |
| <i>Terminalia sericea</i> Burch. ex DC. Synonym: <i>Terminalia angolensis</i> O.Hoffm.                                                     | silver cluster-leaf (E), silwerboom, Vaalboom (A), arnangwe (Z)                            | Combretaceae     | Tree      | Roots      | For treating different form of pain in the chest, neck or shoulders. | Watt and Breyer-Brandwijk (1962)           | 1  |
| <i>Tetradenia riparia</i> (Hochst.) Codd. Synonyms: <i>Basilicum riparium</i> (Hochst.) Kuntze, <i>Plectranthus riparius</i> Hochst.       | misty plume bush, ginger bush (E), gemmerbos, watersalie (A), Iboza, Ibozane (E)           | Lamiaceae        | Herb      | ns         | Used for treating back pain                                          | Mbanjwa (2020)                             | 1  |
| <i>Tetragonia tetragonioides</i> (Pall.) Kuntze. Synonyms: <i>Demidovia tetragonioides</i> Pall., <i>Tetragonia borealis</i> Batt. & Trab. | New Zealand spinach (E), Ibohloholo elimhlophe (Z)                                         | Aizoaceae        | Herb      | ns         | Musculo-skeletal (inflammation). Used as poltices for swollen feed   | Mhlongo and Van Wyk (2019); Mbanjwa (2020) | 2  |
| <i>Teucrium africanum</i> Thunb. Synonym: <i>Ajuga africana</i> (Thunb.) Pers.                                                             | Aambeibossie, Bitterbos, Katjiedriedoring, Paddaklou, drievingertee, katjie-drie-blaar (A) | Lamiaceae        | Shrub     | ns         | Used for the treatment of stomach ailments                           | Hulley and Van Wyk (2019)                  | 1  |
| <i>Teucrium trifidum</i> Retz. Synonyms: <i>Ajuga capensis</i> (Thunb.) Pers., <i>Teucrium capense</i> Thunb.                              | Aambeibossie, Akkedispoot, Koorsbossie, Akkedispootjie, katjiedrieblaar (A)                | Lamiaceae        | Herb      | ns         | For treating back pain                                               | Van Wyk et al. (2008)                      | 1  |
| <i>Thesium lineatum</i> L. f. Synonyms: <i>Thesium ephedroides</i> A.W. Hill, <i>Thesium rigidum</i> Sond., <i>Thesium sparteum</i> R.Br.  | Black storm (E), sawrtstrom, Vaalstorm, Witstorm (A)                                       | Santalaceae      | Shrub     | Roots      | Roots are burnt to relieve headache                                  | Philander (2011)                           | 1  |

| <b>Botanical name</b>                                                                                                                                | <b>*Common name</b>                                                                                                                     | <b>Family</b>  | <b>Life-form</b> | <b>#Part used</b>     | <b>Application</b>                                                                                                                                                                               | <b>Reference</b>                                                                        | <b>Nm</b> |
|------------------------------------------------------------------------------------------------------------------------------------------------------|-----------------------------------------------------------------------------------------------------------------------------------------|----------------|------------------|-----------------------|--------------------------------------------------------------------------------------------------------------------------------------------------------------------------------------------------|-----------------------------------------------------------------------------------------|-----------|
| <i>Toddalia asiatica</i> (L.) Lam.<br>Synonyms: <i>Cranzia asiatica</i> (L.) Kuntze, <i>Toddalia aculeata</i> (Sm.) Pers.                            | Orange climber (E),<br>Gwambazi (V)                                                                                                     | Rutaceae       | Shrub            | Roots                 | Root decoction is drunk twice daily for heart pains and backache                                                                                                                                 | Arnold and Gulumian (1984)                                                              | 1         |
| <i>Trema orientalis</i> (L.) Blume.<br>Synonyms: <i>Celtis commersonii</i> Brongn., <i>Sponia commersonii</i> Decaisne ex Planchon                   | Trema, pigeon wood (E),<br>hophout (A), umSekeseke,<br>umBhangabhanga,<br>umBengebenge                                                  | Cannabaceae    | Tree             | ns                    | Infusion used for toothache                                                                                                                                                                      | Coopoosamy and Naidoo (2012)                                                            | 1         |
| <i>Trichilia dregeana</i> Sond.<br>Synonym: <i>Trichilia strigulosa</i> Welw. ex C.DC.                                                               | Natal forest mahogany (E),<br>Bosrooieshout (A),<br>Mutshikili, Mutuhu, Muuhu (V),<br>umathunzini,<br>umkhuhla, Igxolo,<br>umkhuhlu (Z) | Meliaceae      | Tree             | Bark                  | Bark decoctions are administered as enemas for backache associated with kidney problems. Unspecified parts are used for stomach complaints and backache. Analgesic (lower back aches, toothache) | Hutchings et al. (1996); Watt and Breyer-Brandwijk (1962); Mhlongo and Van Wyk (2019)   | 3         |
| <i>Trichilia emetica</i> Vahl.<br>Synonyms: <i>Elcaja emetica</i> Forssk., <i>Geniostephanus tomentosus</i> Fenzl                                    | Cape/Natal mahogany, reel ash, thunder tree(E),<br>basteresse(n)hout (A),<br>Mutshikili, Mutuhu (V),<br>umkhuhlwa (Z)                   | Meliaceae      | Tree             | Seeds,<br>bark, roots | Oil from seeds taken orally for rheumatism. Bark decoction is used as enema to treat pains in the waist in men. Root infusion is used for treating painful feet                                  | Watt and Breyer-Brandwijk (1962); Arnold and Gulumian (1984); Tshikalange et al. (2016) | 3         |
| <i>Tulbaghia alliacea</i> L.f.<br>Synonyms: <i>Omentaria alliacea</i> (L.f.) Kuntze, <i>Tulbaghia brachystemma</i> Kunth                             | wild garlic (E),<br>wildeknotflok (A), ishaladilezinyoka,<br>knoffel (KS),<br>isikhwa, umwelela (Z)                                     | Amaryllidaceae | Herb             | Rhizomes              | Infusions are also used by for rheumatism                                                                                                                                                        | Watt and Breyer-Brandwijk (1962); Nortje and van Wyk (2015)                             | 2         |
| <i>Tulbaghia capensis</i> L.<br>Synonyms: <i>Omentaria capensis</i> (L.) Kuntze, <i>Tulbaghia cepacea</i> L.f., <i>Tulbaghia pulchella</i> Avé-Lall. | Wild garlic (E), wilde knoffel (A)                                                                                                      | Amaryllidaceae | Herb             | Bulbs                 | Treatment for arthritis                                                                                                                                                                          | Philander (2011)                                                                        | 1         |

| <b>Botanical name</b>                                                                                                          | <b>*Common name</b>                                                                                        | <b>Family</b>  | <b>Life-form</b> | <b>#Part used</b>           | <b>Application</b>                                                                                                                                                                                                                                   | <b>Reference</b>                                                                                                                     | <b>Nm</b> |
|--------------------------------------------------------------------------------------------------------------------------------|------------------------------------------------------------------------------------------------------------|----------------|------------------|-----------------------------|------------------------------------------------------------------------------------------------------------------------------------------------------------------------------------------------------------------------------------------------------|--------------------------------------------------------------------------------------------------------------------------------------|-----------|
| <i>Tulbaghia violacea</i> Harv.<br>Synonyms: <i>Omentaria alliacea</i> (L.f.) Kuntze, <i>Tulbaghia brachystemma</i> Kunth      | Wild garlic (E), wildeknofflok, wildeknoffel, bergknoffe (A), isihaqa (Z)                                  | Amaryllidaceae | Herb             | Tubers/bulbs, roots, leaves | Pounded tuber decoctions are administered as enemas for stomach ailments. Leaves are rubbed on the head for sinus headache. Administered in enemas for rheumatism. Clove pieces are placed in castor oil to make eardrops. Used for stomach ailments | Watt and Breyer-Brandwijk (1962); Hutchings et al. (1996); Hulley and Van Wyk (2019); Thring and Weitz (2006); Mintsu Mi Nzue (2009) | 5         |
| <i>Turbina oblongata</i> A. Meeuse.<br>Synonyms: <i>Ipomoea lambtoniana</i> , <i>Ipomoea oblongata</i> E. Mey. ex Choisy       | Honeysuckle Tree (E), ubhoqo (Z)                                                                           | Convolvulaceae | Herb             | Leaves, roots               | Leaves are used as poultices for swollen joints, sores and abscesses. Taken internally for rheumatism and gout. Ground root decoctions are taken three times a day for arthritis and gout. Enemas made from roots are given for pain of the spine    | Hutchings et al. (1996); Pujol (1990); Polori et al. (2018)                                                                          | 3         |
| <i>Turraea floribunda</i> Hochst.<br>Synonym: <i>Rutaea floribunda</i> (Hochst.) M.Roem.                                       | Honeysuckle Tree (E), Kanferfoelieboom (A), Umadlozana (X), Ubhugulo, Umadlozana, Umadlozane (Z)           | Meliaceae      | Tree             | Roots                       | Root infusions are taken for rheumatism. Root decoctions are taken as emetics to treat swollen and painful joints                                                                                                                                    | Watt and Breyer-Brandwijk (1962); Pujol (1990)                                                                                       | 2         |
| <i>Urtica dioica</i> L. Synonyms: <i>Urtica dioica</i> var. <i>vulgaris</i> Wedd., <i>Urtica galeopsifolia</i> Wierzb. ex Opiz | Nettle (E)                                                                                                 | Urticaceae     | Herb             | Leaves                      | Leaves are applied topically for arthritis and rheumatism                                                                                                                                                                                            | Philander (2011)                                                                                                                     | 1         |
| <i>Urtica urens</i> L. Synonym: <i>Urtica trianae</i> Rusby                                                                    | Annual nettle, dwarf nettle, small nettle, dog nettle, burning nettle (E), perdebrandnekel, brandnekel (A) | Urticaceae     | Herb             | ns                          | Infusion used for toothache, ear-ache, pain and inflammation. Remedy for treating rheumatism                                                                                                                                                         | Hulley and Van Wyk (2019)                                                                                                            | 1         |
| <i>Vachellia karroo</i> (Hayne) Banfi & Galasso. Synonyms: <i>Acacia</i>                                                       | Sweet thorn (E), soetdoring, doringboom                                                                    | Fabaceae       | Tree             | Bark, thorns,               | Analgesic (sharp internal body pains). Bark is used to                                                                                                                                                                                               | Mhlongo and Van Wyk (2019); De                                                                                                       | 5         |

| Botanical name                                                                                                                                                                                                                   | *Common name                                                                                           | Family    | Life-form | #Part used        | Application                                                                                                                                                                                                                                                        | Reference                                                                                                        | Nm |
|----------------------------------------------------------------------------------------------------------------------------------------------------------------------------------------------------------------------------------|--------------------------------------------------------------------------------------------------------|-----------|-----------|-------------------|--------------------------------------------------------------------------------------------------------------------------------------------------------------------------------------------------------------------------------------------------------------------|------------------------------------------------------------------------------------------------------------------|----|
| <i>karroo, Acacia inconflagrabilis</i><br>Gerstner                                                                                                                                                                               | (A), mooka (TW), Muunga (V), Ingamazi, Ingamazi elincane, Umunga, Umantungane, Usidlodlo (Z)           |           |           | leaves, roots, ns | treat aching legs. Used for stomachache. Thorn decoction is drunk to relieve heart pains. Gum is eaten for stomach ailments and toothache. Bark infusion used to treat stomachache, pain and inflammation. Root infusion is used to treat swollen and burning feet | Beer and Van Wyk (2011); Watt and Breyer-Brandwijk (1962); Arnold and Gulumian (1984); Hulley and Van Wyk (2019) |    |
| <i>Vachellia natalitia</i> (E.Mey.) Kyal. & Boatwr. Synonym: <i>Acacia natalitia</i> E.Mey.                                                                                                                                      | Natal Thorn (E), Nataldoring (A), Isingqawe, Isinqawe, Umunga, Umnqawe (Z)                             | Fabaceae  | Tree      | ns                | Analgesic (sharp internal body pains)                                                                                                                                                                                                                              | Mhlongo and Van Wyk (2019)                                                                                       | 1  |
| <i>Vachellia nilotica</i> (DC.) Kyal. & Boatwr. subsp. <i>kraussiana</i> (Benth.) Kyal. & Boatwr. Synonyms: <i>Acacia arabica</i> var. <i>nilotica</i> (L.) Benth., <i>Acacia scorpioides</i> var. <i>nilotica</i> (L.) A. Chev. | Scented-pod acacia (E), lekkerruikpeul (A), Motsha (TW), Isambulela, Isingqawe, Isinqawe, Umunga (Z)   | Fabaceae  | Tree      | Roots, ns         | Analgesic (sharp internal body pains). Root decoction is used for back pains                                                                                                                                                                                       | Mhlongo and Van Wyk (2019); Tshikalange et al. (2016)                                                            | 2  |
| <i>Vachellia sieberiana</i> (DC.) = <i>Vachellia sieberiana</i> (L.) P.J.H. Hurter & Mabb. var. <i>woodii</i> (Burt Davy) Kyal. & Boatwr. Kyal. & Boatwr. Synonyms: <i>Acacia sieberiana</i> , <i>Acacia amboensis</i>           | paperbark thorn (E), Mokha, Morumosetlha (TW), mavelo (V), Isinqawe esimphlope, Umkhamba, Uselephe (Z) | Fabaceae  | Tree      | Bark, ns          | Bark infusions are administered as enemas for back pain. Analgesic (sharp internal body pains)                                                                                                                                                                     | Watt and Breyer-Brandwijk (1962); Mhlongo and Van Wyk (2019)                                                     | 2  |
| <i>Vangueria infausta</i> Burch. Synonyms: <i>Canthium infaustum</i> (Burch.) Baill., <i>Vangueria tomentosa</i> Hochst.                                                                                                         | wild medlar (E); wilde mispel (A), Mabilo (SL), Amaviyo, Umtulwa (Z)                                   | Rubiaceae | Tree      | ns, bark, roots   | Analgesic (internal side pains), chest side pains in infants. Bark and roots are medicine for alleviating toothache. Used as steam bath for treating painful body                                                                                                  | Mhlongo and Van Wyk (2019); Shai et al. (2020); Mbanjwa (2020)                                                   | 3  |

| <b>Botanical name</b>                                                                                                                                                        | <b>*Common name</b>                                                                                                                                                                | <b>Family</b>  | <b>Life-form</b> | <b>#Part used</b> | <b>Application</b>                                                                                                                                                                           | <b>Reference</b>                                                                      | <b>Nm</b> |
|------------------------------------------------------------------------------------------------------------------------------------------------------------------------------|------------------------------------------------------------------------------------------------------------------------------------------------------------------------------------|----------------|------------------|-------------------|----------------------------------------------------------------------------------------------------------------------------------------------------------------------------------------------|---------------------------------------------------------------------------------------|-----------|
| <i>Vangueria lasiantha</i> (Sond.) Sond. Synonyms: <i>Lagynias discolor</i> E.Mey. ex Robyns, <i>Pachystigma lasianthum</i> Sond.                                            | Smooth Pendent-medlar (E), Amatulwa, Umtulw                                                                                                                                        | Rubiaceae      | Tree             | Leaves            | Leaves are used for steaming to cure painful body                                                                                                                                            | Mbanjwa (2020)                                                                        | 1         |
| <i>Veltheimia capensis</i> (L.) DC. Synonyms: <i>Aletris capensis</i> L., <i>Fabricia glauca</i> (Aiton) Salisb.                                                             | quarobe, sand lily (E), kwarobe, sandlelie (A)                                                                                                                                     | Asparagaceae   | Herb             | ns                | Used for the treatment of stomach-related ailments                                                                                                                                           | Hulley and Van Wyk (2019)                                                             | 1         |
| <i>Vepris undulata</i> Verdoorn & C. A. Sm. Synonym: <i>Toddalia lanceolata</i> Lam.                                                                                         | white ironwood (E), witysterhout (A), Muhondwa, muumano, phaladzane (V), umZane (X), umOzana (Z)                                                                                   | Rutaceae       | Tree             | Leaves            | Powder leaves is used externally on incision made on forehead to relieve headache                                                                                                            | Arnold and Gulumian (1984)                                                            | 1         |
| <i>Veronica anagallis-aquatica</i> L. Synonyms: <i>Veronica anagallidiformis</i> Boreau, <i>Veronica brittonii</i> Porter ex Pennell                                         | water speedwell (E), waterboege (A)                                                                                                                                                | Plantaginaceae | Herb             | Leaves            | Infusion from the leaves is used to treat backache, wash painful legs and feet                                                                                                               | De Beer and Van Wyk (2011)                                                            | 1         |
| <i>Viscum capense</i> L. f. Synonyms: <i>Viscum rigidum</i> Engler & Krause, <i>Viscum robustum</i> Eckl. & Zeyh.                                                            | Cape Mistletoe (E), Voëlent, litjiestee (A)                                                                                                                                        | Santalaceae    | Herb             | ns                | Infusion is used to treat headache                                                                                                                                                           | Hulley and Van Wyk (2019)                                                             | 1         |
| <i>Vitex obovata</i> E.Mey. Synonyms: <i>Vitex reflexa</i> H.Pearson, <i>Vitex wilmsii</i> Gürke                                                                             | Hairy Fingerleaf (E), Vaalbos (A), umduli, umluthu (Z)                                                                                                                             | Lamiaceae      | Tree             | Leaves            | Leaf infusions are administered as enemas for stomach ache                                                                                                                                   | Watt and Breyer-Brandwijk (1962)                                                      | 1         |
| <i>Volkameria glabra</i> (E.Mey.) Mabb. & Y.W. Yuan. Synonyms: <i>Clerodendrum glabrum</i> E.Mey, <i>Siphonanthus glaber</i> (E.Mey.) Hiern, <i>Premna suaveolens</i> Chiov. | Tinderwood, verbena tree, white eat's whiskers (E), tontelhout, bitterblaar, bontelhout, harpuisblaar, huilboom (A), munukha-tshilongwe (V), umqangazane, umqaqongu, umqoqongo (Z) | Lamiaceae      | Shrub            | Leaves, roots, ns | Hot water infusions from roots, mixed with those of <i>Tetradenia riparia</i> are taken as emetics for dropsy and rheumatic conditions. Leaves are used for toothache. Analgesic (toothache) | Watt and Breyer-Brandwijk (1962); Hutchings et al. (1996); Mhlongo and Van Wyk (2019) | 3         |

| <b>Botanical name</b>                                                                                                     | <b>*Common name</b>                                                                                                                                           | <b>Family</b> | <b>Life-form</b> | <b>#Part used</b>   | <b>Application</b>                                                                                                                                                                                                                                                                                                                                             | <b>Reference</b>                                                                                                     | <b>Nm</b> |
|---------------------------------------------------------------------------------------------------------------------------|---------------------------------------------------------------------------------------------------------------------------------------------------------------|---------------|------------------|---------------------|----------------------------------------------------------------------------------------------------------------------------------------------------------------------------------------------------------------------------------------------------------------------------------------------------------------------------------------------------------------|----------------------------------------------------------------------------------------------------------------------|-----------|
| <i>Warburgia salutaris</i> (G.Bertol.) Chiov. Synonyms: <i>Chibaca salutaris</i> , <i>Warburgia breyeri</i> R.Pott        | Fever tree, pepper-bark tree (E), koorsboom, peperbasboom (A), mulanga (V), amazwecehlabayo, isibaha, isibhaha (Z)                                            | Canellaceae   | Tree             | Bark, leaves, roots | Bark is used in emetics or purgatives for febrile complaints and for rheumatism. Lotions made from pounded leaves with stalks of <i>Hibiscus surattensis</i> are applied to the penis for inflammation of the urethra, sores and other irritation. Powdered roots are applied on oral cavity to relieve toothache. Decoction of the bark is taken for backache | Hutchings et al. (1996); Corrigan et al. (2011); Arnold and Gulumian (1984)                                          | 3         |
| <i>Withania somnifera</i> (L.) Dunal. Synonyms: <i>Physalis somnifera</i> , <i>Withania microphysalis</i>                 | Wilde-appelliefie (A), Winter Cherry, Poisonous Gooseberry (E), Ubuvuma (X), Impathampatha, Ubuvimba Umaqhunsula, Ubuvumba (Z)                                | Solanaceae    | Shrub            | Leaves, roots       | Leaf poultices are applied externally to treat rheumatism. Musculo-skeletal (inflammation). For treating inflammation. Leaf infusions are used to treat stomach ailments                                                                                                                                                                                       | Hutchings et al. (1996); Mhlongo and Van Wyk (2019); Maroyi (2017); Van Wyk et al. (2008); Hulley and Van Wyk (2019) | 5         |
| <i>Ximenia americana</i> L. Synonyms: <i>Amyris arborescens</i> P. Browne, <i>Ximenia americana</i> var. <i>americana</i> | Small blue sourplum (E), kleinblousuurpruim (A), morotologana (TW), hwele, mosidi-wa-serotologane (NS); mutanzwa (V), umtunduluka-omncane, umkholotshwana (Z) | Olacaceae     | Tree             | Roots               | Roots are used in the treatment of stomachache                                                                                                                                                                                                                                                                                                                 | Mongalo and Makhafola (2018)                                                                                         | 1         |
| <i>Ximenia caffra</i> Sond.                                                                                               | Plum, large sourplum (E), Kleinsuurpruim (A), Mutanwadombo, Mutshili (V), Umthunduluka-obomvu (Z)                                                             | Olacaceae     | Tree             | Leaves, roots       | Cold leaf infusions are applied to inflamed eyes. Root decoction is use to prepare soft porridge for headache due to indigestion                                                                                                                                                                                                                               | Watt and Breyer-Brandwijk (1962); Mabogo (1990); Arnold and Gulumian (1984)                                          | 3         |



| <b>Botanical name</b>                                                                                                                                | <b>*Common name</b>                                                                                                                                       | <b>Family</b> | <b>Life-form</b> | <b>#Part used</b>               | <b>Application</b>                                                                                                                                                                                                    | <b>Reference</b>                                                                                                             | <b>Nm</b> |
|------------------------------------------------------------------------------------------------------------------------------------------------------|-----------------------------------------------------------------------------------------------------------------------------------------------------------|---------------|------------------|---------------------------------|-----------------------------------------------------------------------------------------------------------------------------------------------------------------------------------------------------------------------|------------------------------------------------------------------------------------------------------------------------------|-----------|
| <i>Xysmalobium undulatum</i> (L.) W.T. Aiton Synonyms: <i>Asclepias ciliata</i> Murray ex Decne., <i>Asclepias undulata</i> L.                       | Milk bush, milkwort, uzura, wild cotton, wave-leaved xysmalobium (E), Ishongwe, Indonya (Z)                                                               | Apocynaceae   | Herb             | Roots, stem, ns                 | Musculo-skeletal (inflammation). For relieving headache                                                                                                                                                               | Mhlongo and Van Wyk (2019); Mintsami Nzue (2009)                                                                             | 2         |
| <i>Zantedeschia aethiopica</i> (L.) Spreng. Synonyms: <i>Arodes aethiopicum</i> (L.) Kuntze, <i>Colocasia aethiopica</i> (L.) Link                   | White or common arum lily (E); wit varkooor (A), Ingquthuyengane, Intebe (Z)                                                                              | Araceae       | Herb             | Leaves, ns                      | Musculo-skeletal inflammation. Compress leaves is used for treating backache, rheumatism, headache, pain and inflammation. Treatment for arthritis                                                                    | Mhlongo and Van Wyk (2019); Hulley and Van Wyk (2019); Philander (2011)                                                      | 3         |
| <i>Zanthoxylum capense</i> (Thunb.) Harv. Synonyms: <i>Fagara magaliesmontana</i> Engl., <i>Zanthoxylum thunbergii</i> var. <i>obtusifolia</i> Harv. | Adelaide spice tree, cardamom (E), kleinperdepram (A), Umabelejongosi, isinungwane, umlungumabele (Z)                                                     | Rutaceae      | Tree             | Leaves, bark (root-bark), roots | Leaves are used to heal sores. Dried ground root-bark is directly applied for toothache. Analgesic (general body pains). An infusion of the root is taken to treat toothache. For treating swollen feet and toothache | Bryant (1966); Hutchings et al. (1996); Mhlongo and Van Wyk (2019); Corrigan et al. (2011); Philander (2011); Mbanjwa (2020) | 6         |
| <i>Zanthoxylum davyi</i> Waterm. Synonyms: <i>Zanthoxylum thunbergii</i> var. <i>grandifolia</i> Harv., <i>Fagara davyi</i> I. Verd                  | Fever Tree, Forest Knobwood (E), Knopdoringhout (A), Monokwane (NS), Munungu, Murandela (V), Umlungamabele, Umlungumabele (X), Umnungumabele, Omkhulu (Z) | Rutaceae      | Tree             | Roots, leaves                   | For tooth removal. Root decoction is drunk thrice daily for 3 days to relieve chest pains. Powdered leaves are rubbed on chest to relieve pains                                                                       | Mhlongo and Van Wyk (2019); Mabogo (1990); Mbanjwa (2020)                                                                    | 3         |
| <i>Ziziphus mucronata</i> Willd. Synonyms: <i>Ziziphus madecassus</i> H. Perrier, <i>Ziziphus mucronata</i> subsp. <i>mucronata</i>                  | Blinkblaarboom (A) Buffalo thorn, Cat-thorn (E), Umphafa (X), Mutshetshete, Mukhalu (V), isilahla,                                                        | Rhamnaceae    | Tree             | Bark, roots, leaves             | Bark decoctions are used for rheumatism. Roots are used for toothache. Leaves and roots are used for pain. Analgesic (sharp internal                                                                                  | Mabogo (1990); Mhlongo and Van Wyk (2019); Maroyi (2017);                                                                    | 4         |

| <b>Botanical name</b>                                                              | <b>*Common name</b>                          | <b>Family</b> | <b>Life-form</b> | <b>#Part used</b> | <b>Application</b>                                                                                                  | <b>Reference</b>           | <b>Nm</b> |
|------------------------------------------------------------------------------------|----------------------------------------------|---------------|------------------|-------------------|---------------------------------------------------------------------------------------------------------------------|----------------------------|-----------|
|                                                                                    | umhlahlankosi, umphafa (Z).                  |               |                  |                   | body pains). For treating chest pain. Root decoction is used to prepare soft porridge to relieve general body pains | Arnold and Gulumian (1984) |           |
| <i>Zygothymus foetidus</i> Schrad. & Wendl. Synonym: <i>Zygothymus meyeri</i> Sond | Jakkalspisbos, Jakkalspisbossie, Slymbos (A) | Zygothymaceae | Shrub            | Leaves            | Leaf juice is used for treating ear-ache                                                                            | Hulley and Van Wyk (2019)  | 1         |

## References

- Arnold, H.-J., Gulumian, M. 1984. Pharmacopoeia of traditional medicine in Venda. *Journal of Ethnopharmacology* 12:35-74.
- Bhat, R.B. 2013. Plants of Xhosa people in the Transkei region of Eastern Cape (South Africa) with major pharmacological and therapeutic properties. *Journal of Medicinal Plants Research* 7:1474-1480.
- Bhat, R.B. 2014. Medicinal plants and traditional practices of Xhosa people in the Transkei region of Eastern Cape, South Africa. *Indian Journal of Traditional Knowledge* 13:292-298.
- Bhat, R.B., Jacobs, T.V. 1995. Traditional herbal medicine in Transkei. *Journal of Ethnopharmacology* 48:7-12.
- Bruce, W. 1975. Medicinal properties in the Aloe. *Excelsa* 5: 57-68.
- Bryant, A.T. 1966. Zulu medicine and medicine-men. C. Struik, Cape Town, South Africa.
- Coopoosamy, R.M., Naidoo, K.K. 2012. An ethnobotanical study of medicinal plants used by traditional healers in Durban, South Africa." 6.11 (2012): 818 - 823. *African Journal of Pharmacy and Pharmacology* 6:818-823.
- Corrigan, B.M., Van Wyk, B.-E., Geldenhuys, C.J., Jardine, J.M. 2011. Ethnobotanical plant uses in the KwaNobela Peninsula, St Lucia, South Africa. *South African Journal of Botany* 77:346-359.
- Cumes, D., Loon, R., Bester, D. 2009. *Healing Trees & Plants of the Lowveld*. Struik Nature, Cape Town, South Africa.
- De Beer, J.J.J., Van Wyk, B.E. 2011. An ethnobotanical survey of the Agter-Hantam, Northern Cape Province, South Africa. *South African Journal of Botany* 77:741-754.
- Forbes, V.S. 1986. *Carl Peter Thunberg Travels at the Cape of Good Hope 1772–1775*. Van Riebeeck Society Cape Town, ISBN: 0620109815.

- Gebashe, F., Moyo, M., Aremu, A.O., Finnie, J.F., Van Staden, J. 2019. Ethnobotanical survey and antibacterial screening of medicinal grasses in KwaZulu-Natal Province, South Africa. *South African Journal of Botany* 122:467-474.
- Gerstner, J. 1941. A preliminary check list of Zulu names of plants, with short notes. *Bantu Studies* 13:277-301.
- Hulley, I.M., Van Wyk, B.E. 2019. Quantitative medicinal ethnobotany of Kannaland (western Little Karoo, South Africa): Non-homogeneity amongst villages. *South African Journal of Botany* 122:225-265.
- Hulme, M.M. 1954. *Wild flowers of Natal*. Shuter & Shooter, Pietermaritzburg, South Africa.
- Hutchings, A., Scott, A.H., Lewis, G., Cunningham, A. 1996. *Zulu Medicinal Plants. An Inventory*. University of Natal Press, Pietermaritzburg, South Africa.
- Mabogo, D.E.N. 1990. *The ethnobotany of the Vhavenda*. University of Pretoria.
- Mahwasane, S.T., Middleton, L., Boaduo, N. 2013. An ethnobotanical survey of indigenous knowledge on medicinal plants used by the traditional healers of the Lwamondo area, Limpopo province, South Africa. *South African Journal of Botany* 88:69-75.
- Maroyi, A. 2017. Diversity of use and local knowledge of wild and cultivated plants in the Eastern Cape province, South Africa. *Journal of Ethnobiology and Ethnomedicine* 13:10.1186/s13002-13017-10173-13008.
- Mbanjwa, S.G. 2020. *A quantitative ethnobotanical survey of the Ixopo area of KwaZulu-Natal, South Africa*. University of Johannesburg, Johannesburg, South Africa.
- Mhlongo, L.S., Van Wyk, B.E. 2019. Zulu medicinal ethnobotany: new records from the Amandawe area of KwaZulu-Natal, South Africa. *South African Journal of Botany* 122:266-290.
- Mintsa Mi Nzue, A.P. 2009. *Use and conservation status of medicinal plants in the Cape Peninsula, Western Cape Province of South Africa*. University of Stellenbosch, Stellenbosch, South Africa.

- Mogale, M.M.P., Raimondo, D.C., Van Wyk, B.-E. 2019. The ethnobotany of Central Sekhukhuneland, South Africa. *South African Journal of Botany* 122:90-119.
- Mokganya, M.G., Tshisikhawe, M.P. 2019. Medicinal uses of selected wild edible vegetables consumed by Vhavenda of the Vhembe District Municipality, South Africa. *South African Journal of Botany* 122:184-188.
- Mongalo, N.I., Makhafola, T.J. 2018. Ethnobotanical knowledge of the lay people of Blouberg area (Pedi tribe), Limpopo Province, South Africa. *Journal of Ethnobiology and Ethnomedicine* 14:46.
- Nortje, J.M., van Wyk, B.E. 2015. Medicinal plants of the Kamiesberg, Namaqualand, South Africa. *Journal of Ethnopharmacology* 171:205-222.
- Palmer, E., Pitman, N. 1961. *Trees of South Africa*, Balkema, Cape Town.
- Philander, L.A. 2011. An ethnobotany of Western Cape Rasta bush medicine. *Journal of Ethnopharmacology* 138:578-594.
- Polori, K.L., Mashele, S.S., Madamombe-Manduna, I., Semanya, S.S. 2018. Ethno-medical botany and some biological activities of ipomoea oblongata collected in the Free State Province, South Africa. *Journal of Biological Sciences* 18:441-449.
- Pooley, E. 1993. *The Complete Field Guide to Trees of Natal, Zululand and Transkei*. 1<sup>st</sup> edition. Natal Flora Publications Trust, Durban, South Africa.
- Pujol, J. 1990. *NaturAfrica: The Herbalist Handbook: African Flora, Medicinal Plants*. Natural Healers' Foundation, Durban, South Africa.
- Shai, K.N., Ncama, K., Ndhlovu, P.T., Struwig, M., Aremu, A.O. 2020. An exploratory study on the diverse uses and benefits of locally-sourced fruit species in three villages of Mpumalanga Province, South Africa. *Foods* 9:1581.
- Thring, T.S.A., Weitz, F.M. 2006. Medicinal plant use in the Bredasdorp/Elim region of the southern Overberg in the Western Cape Province of South Africa. *Journal of Ethnopharmacology* 103:261-275.

- Tshikalange, T.E., Mophuting, B.C., Mahore, J., Winterboer, S., Lall, N. 2016. An ethnobotanical study of medicinal plants used in villages under Jongilanga tribal council, Mpumalanga, South Africa. *African Journal of Traditional, Complementary and Alternative Medicines* 13:83-89.
- Van Wyk, B.-E., de Wet, H., Van Heerden, F.R. 2008. An ethnobotanical survey of medicinal plants in the southeastern Karoo, South Africa. *South African Journal of Botany* 74:696-704.
- Van Wyk, B.-E., Gericke, N. 2000. *People's Plants: A Guide to Useful Plants of Southern Africa*. Briza Publications, Pretoria, South Africa.
- Van Wyk, B.-E., Van Oudtshoorn, B., Gericke, N. 1997. *Medicinal Plants of South Africa*. First edition. Briza Publications, Pretoria, South Africa.
- Watt, J.M., Breyer-Brandwijk, M.G. 1962. *The Medicinal and Poisonous Plants of Southern and Eastern Africa*. 2<sup>nd</sup> edition. Livingstone, London, UK.
